# Supplementary material for: Intracellular osteopontin potentiates the immunosuppressive activity of mesenchymal stromal cells
Source: PubMed Central journal article supplement — Stem Cell Res Ther. 2024 Oct 15;15:366. doi: 10.1186/s13287-024-03979-8 (PMC11475537; doi:10.1186/s13287-024-03979-8), 2024-10-15

Figure 1

c

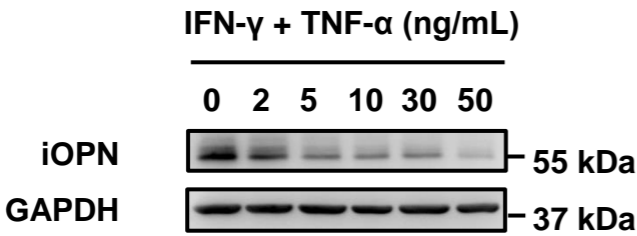

iOPN

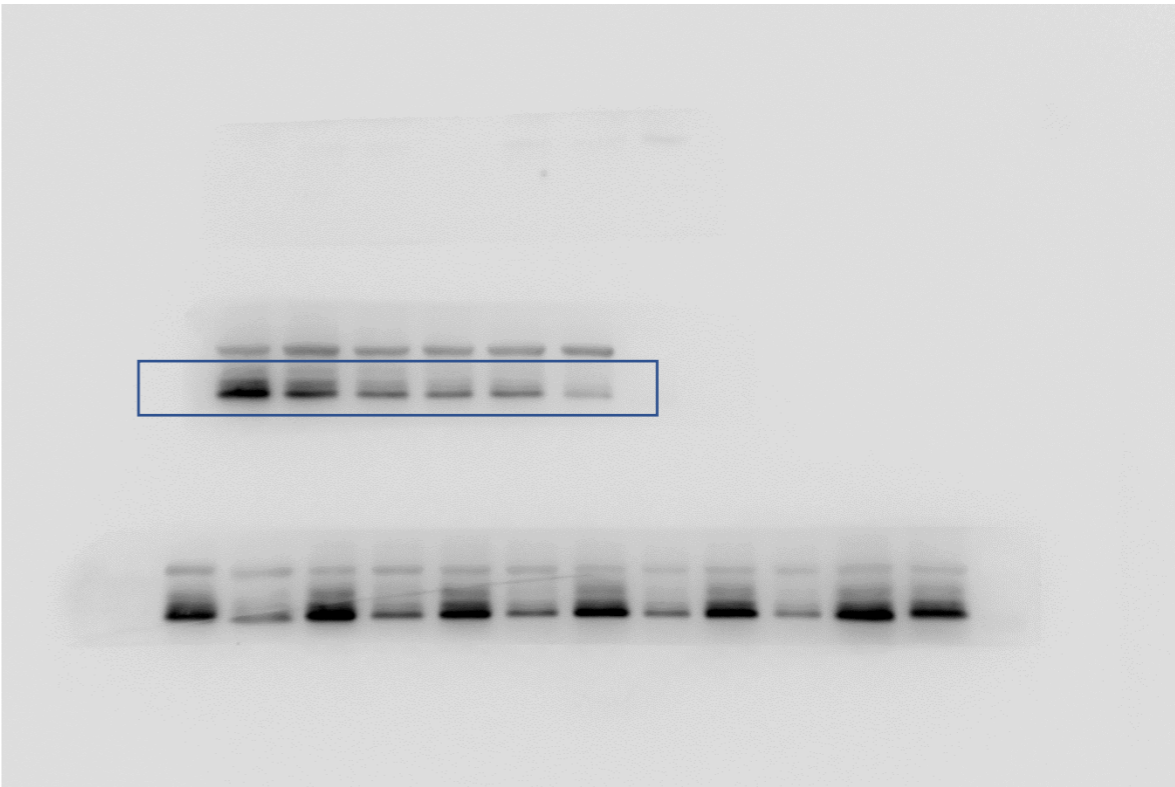

GAPDH

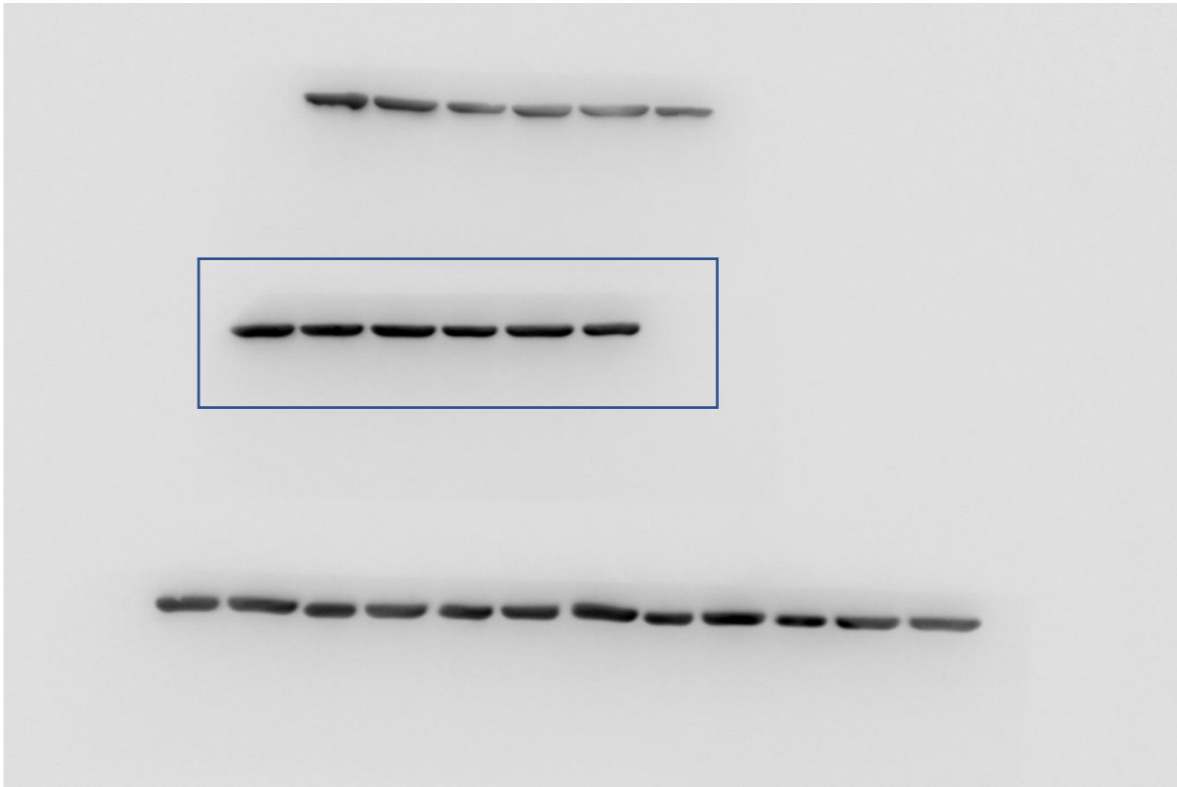

**Figure 1**

**h**

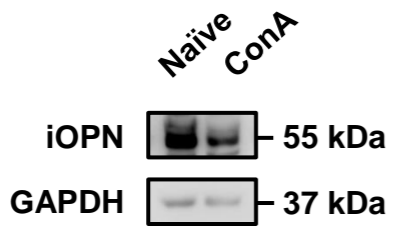

**iOPN**

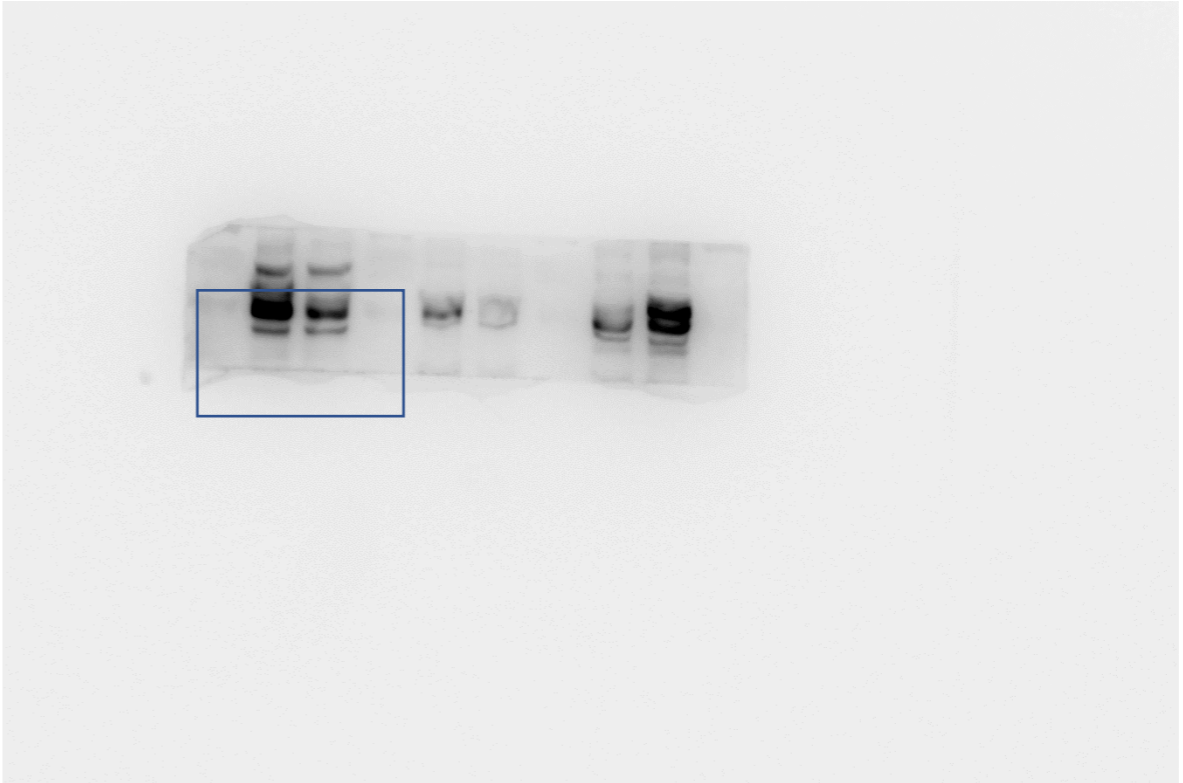

**GAPDH**

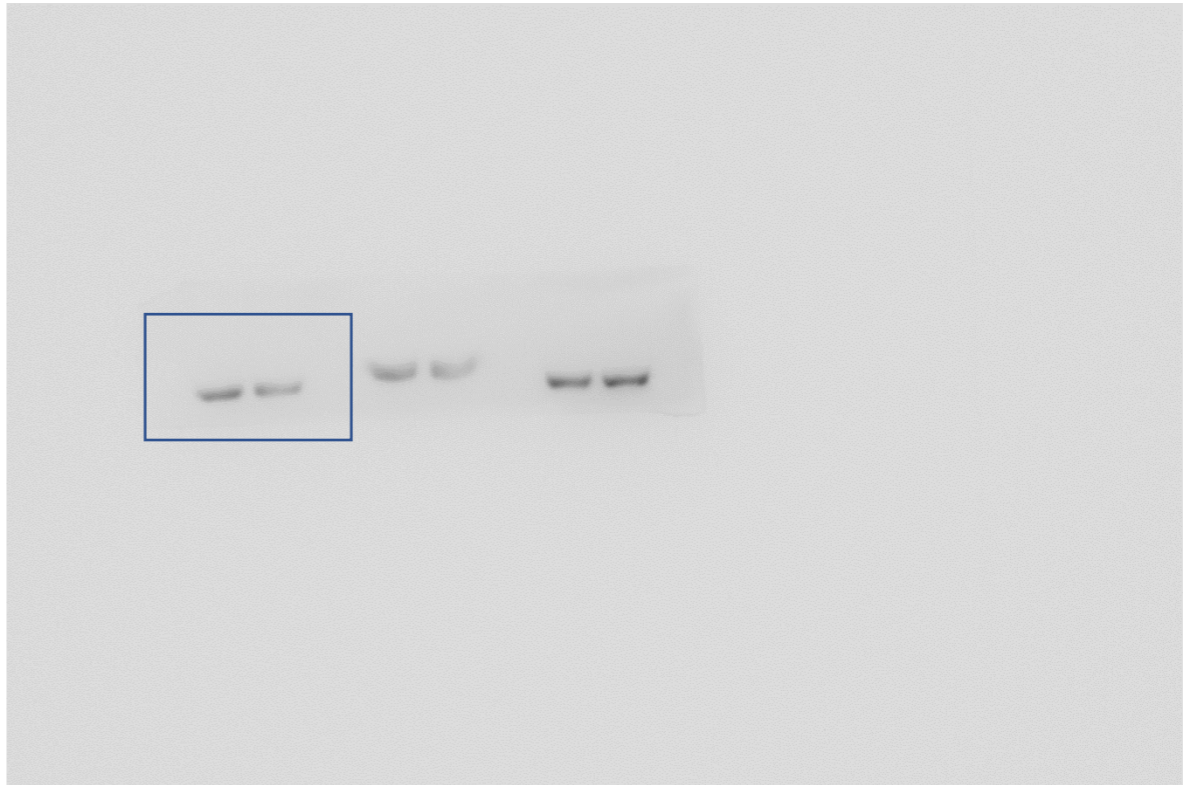

Figure 4

C

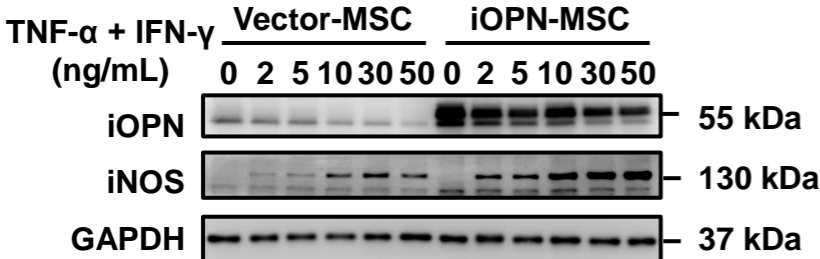

iOPN

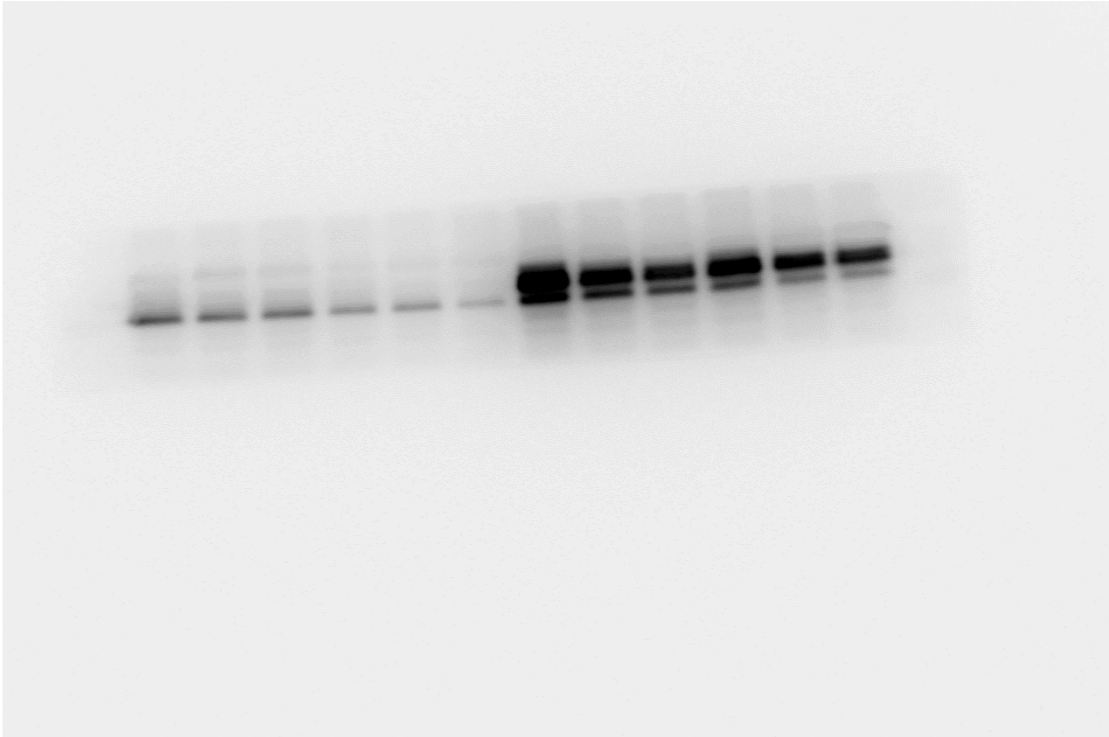

iNOS

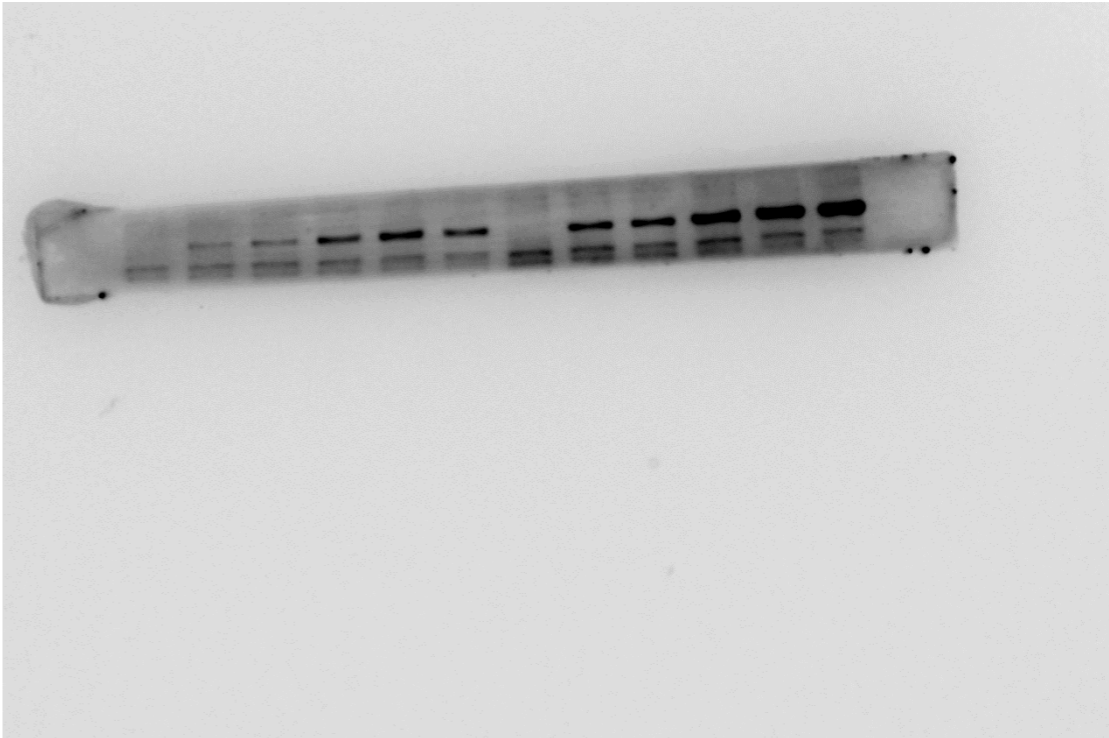

GAPDH

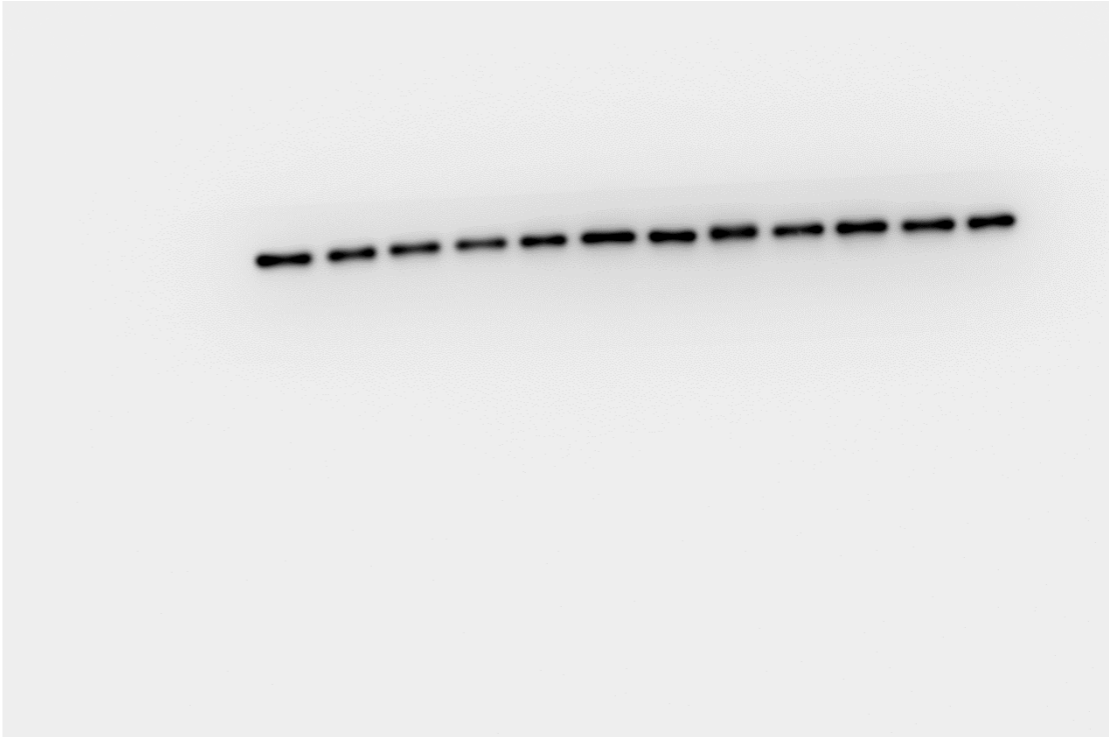

Figure 4

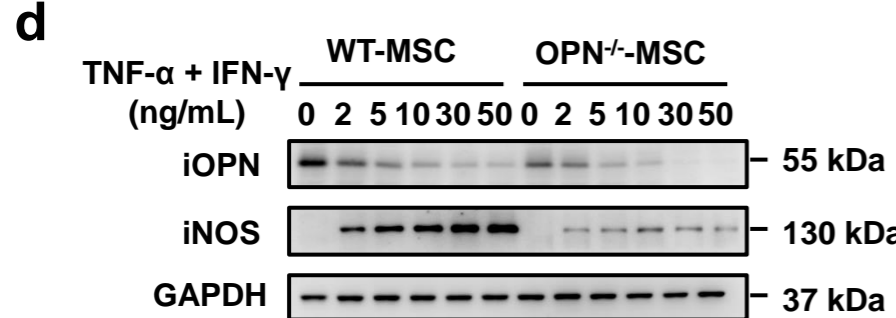

iOPN

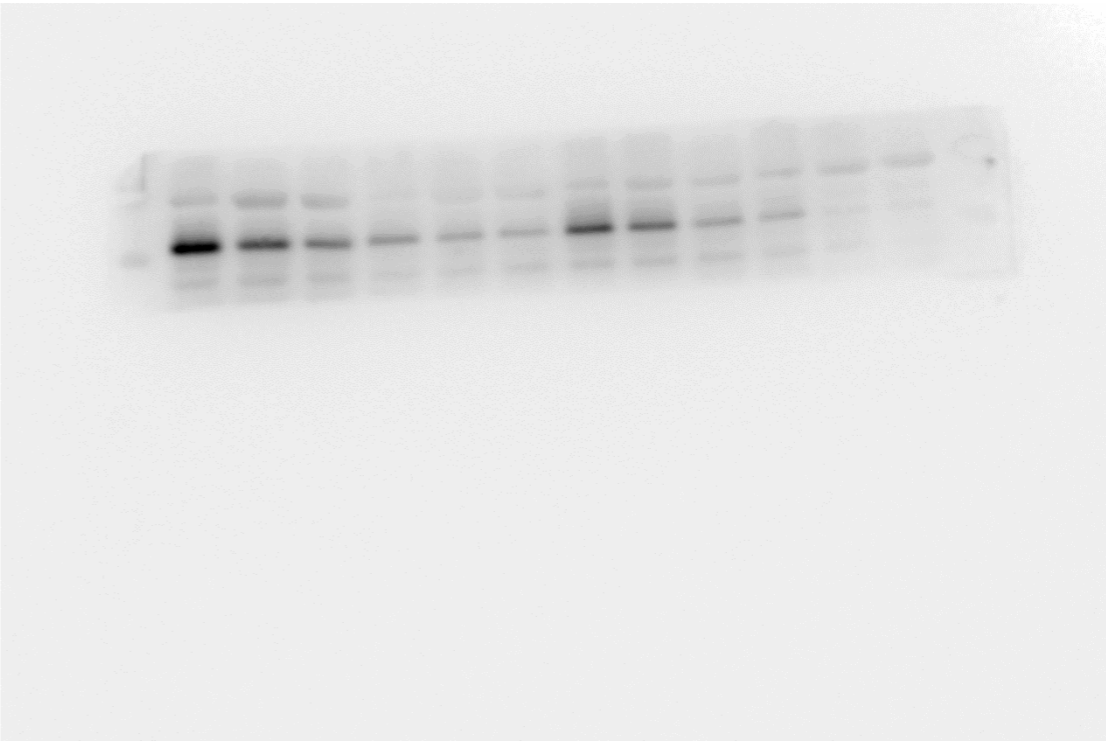

iNOS

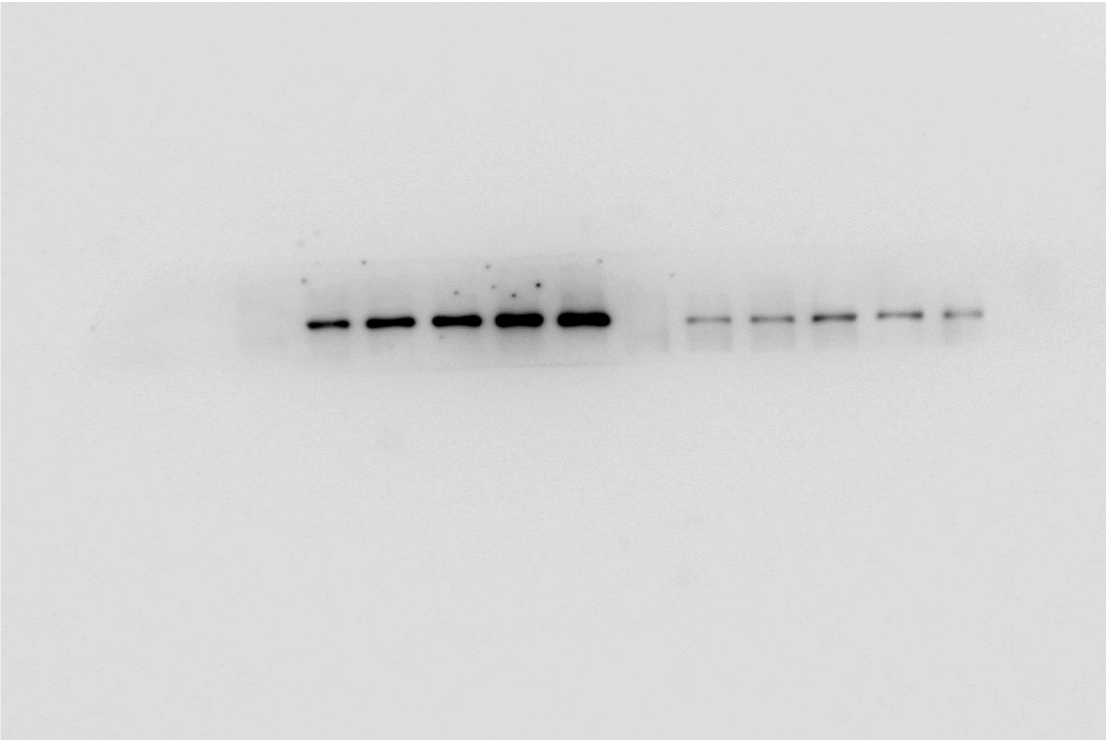

GAPDH

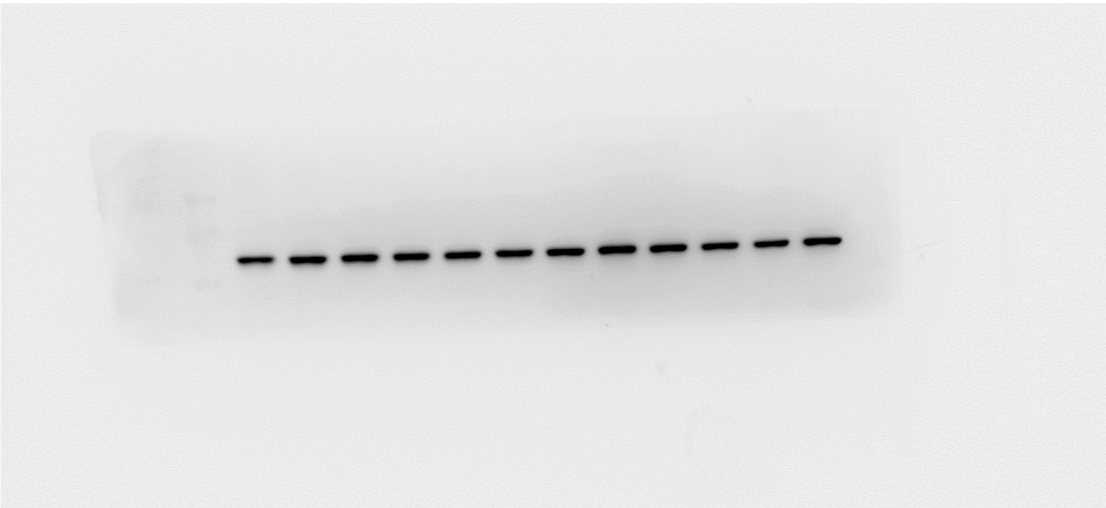



Figure 4

f

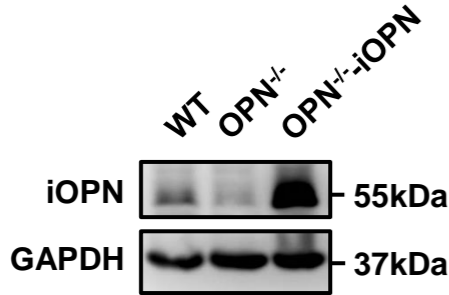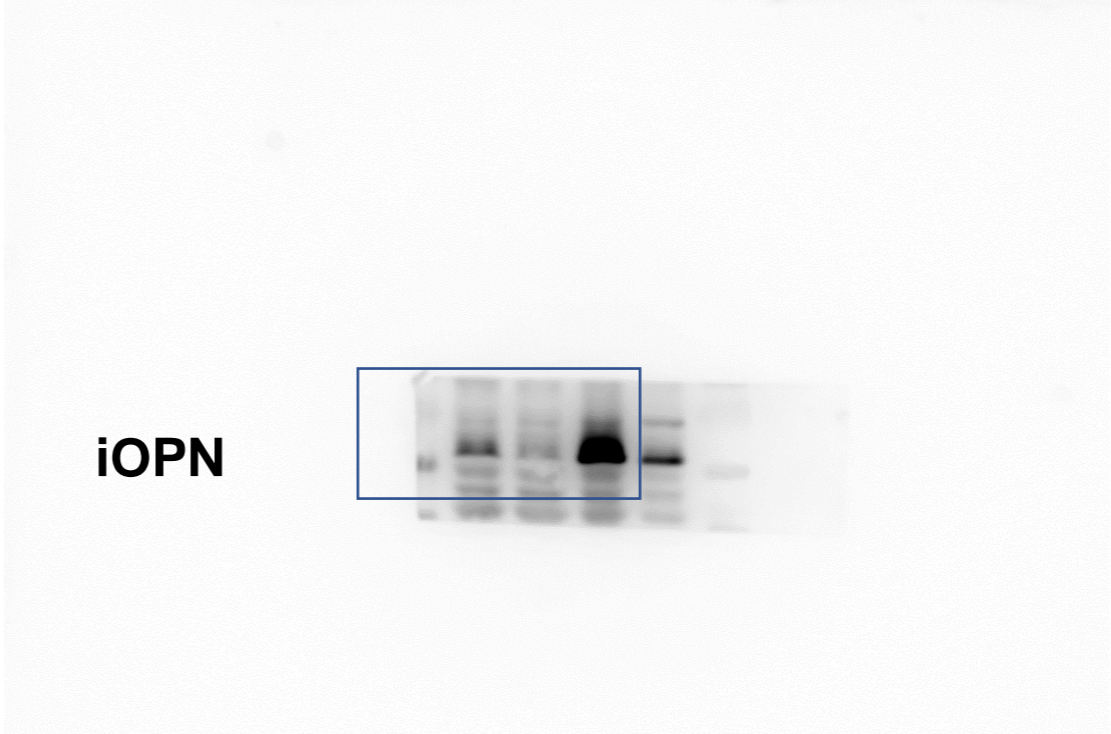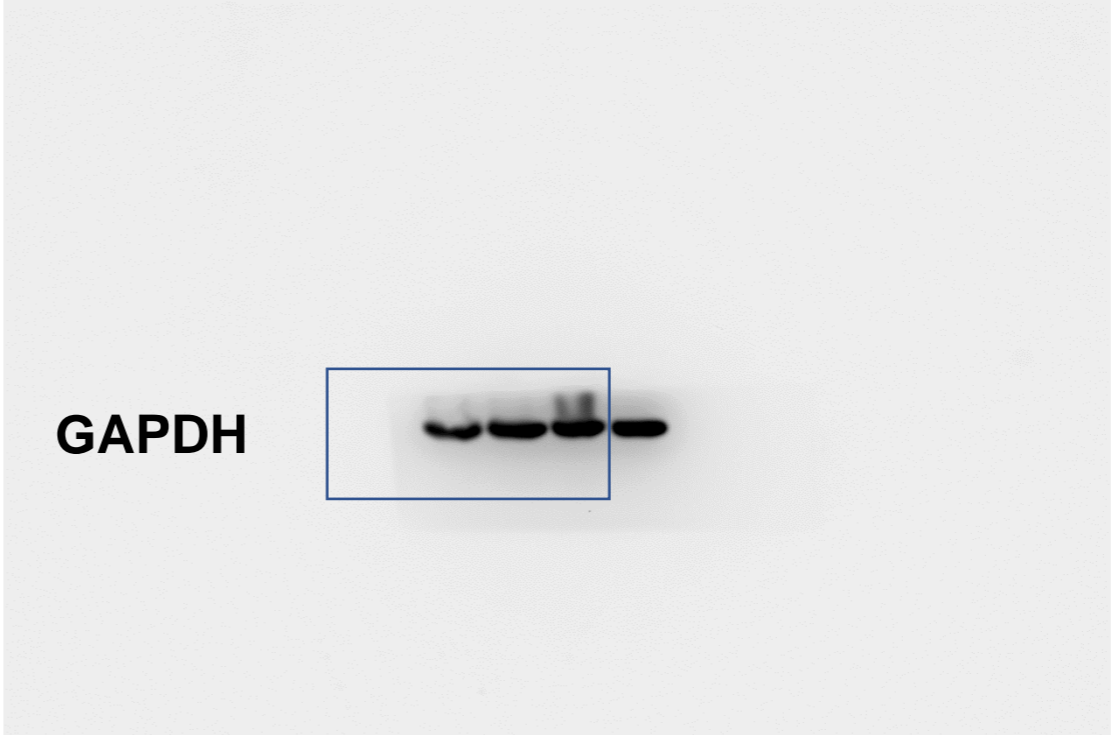

# Figure 5

**a**

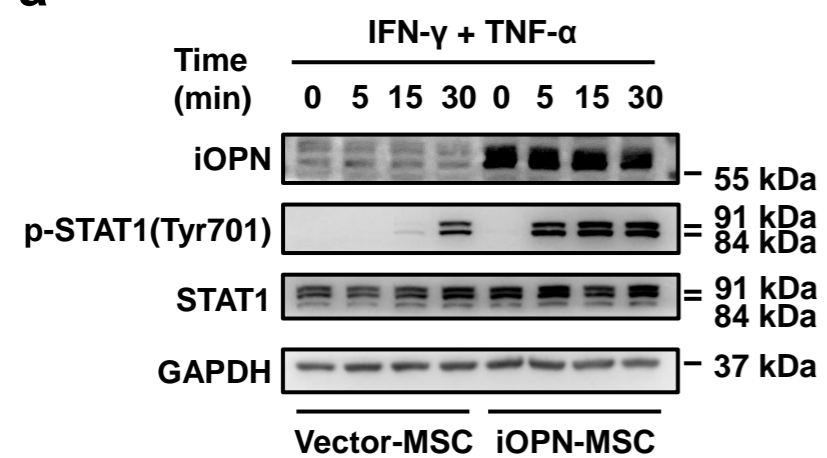

iOPN

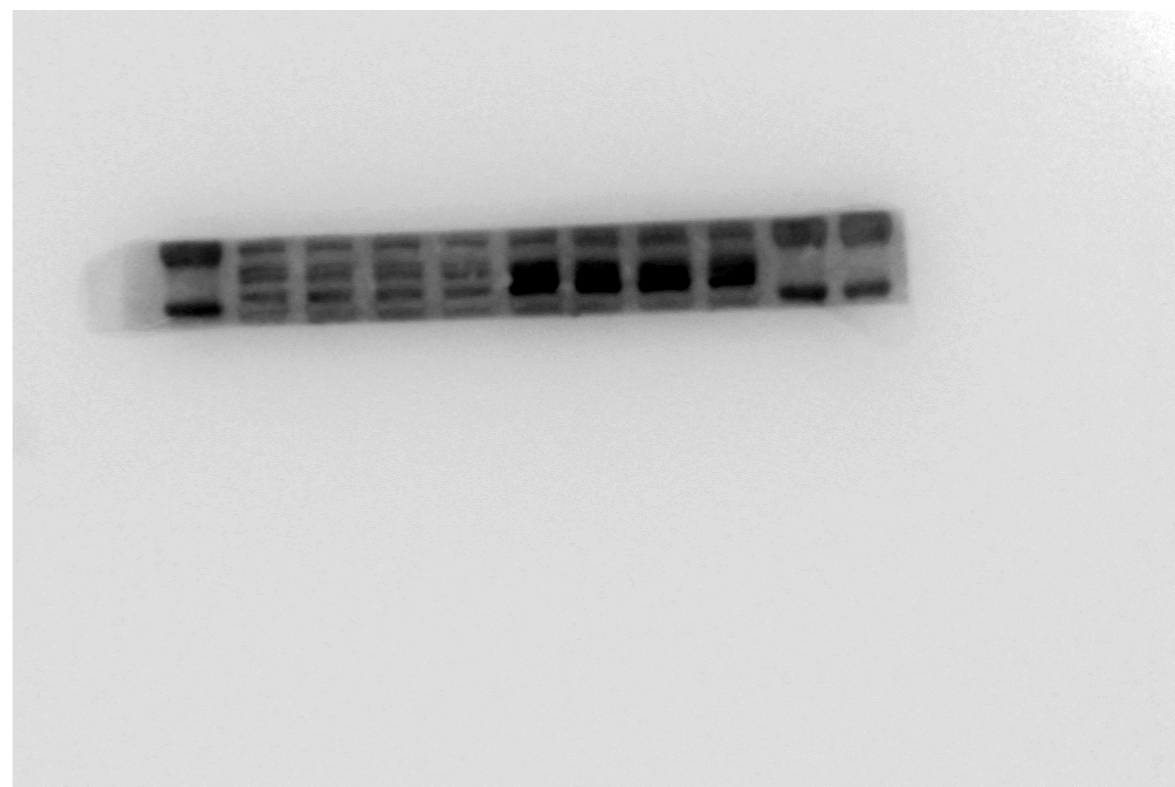

P-STAT1(Tyr701)

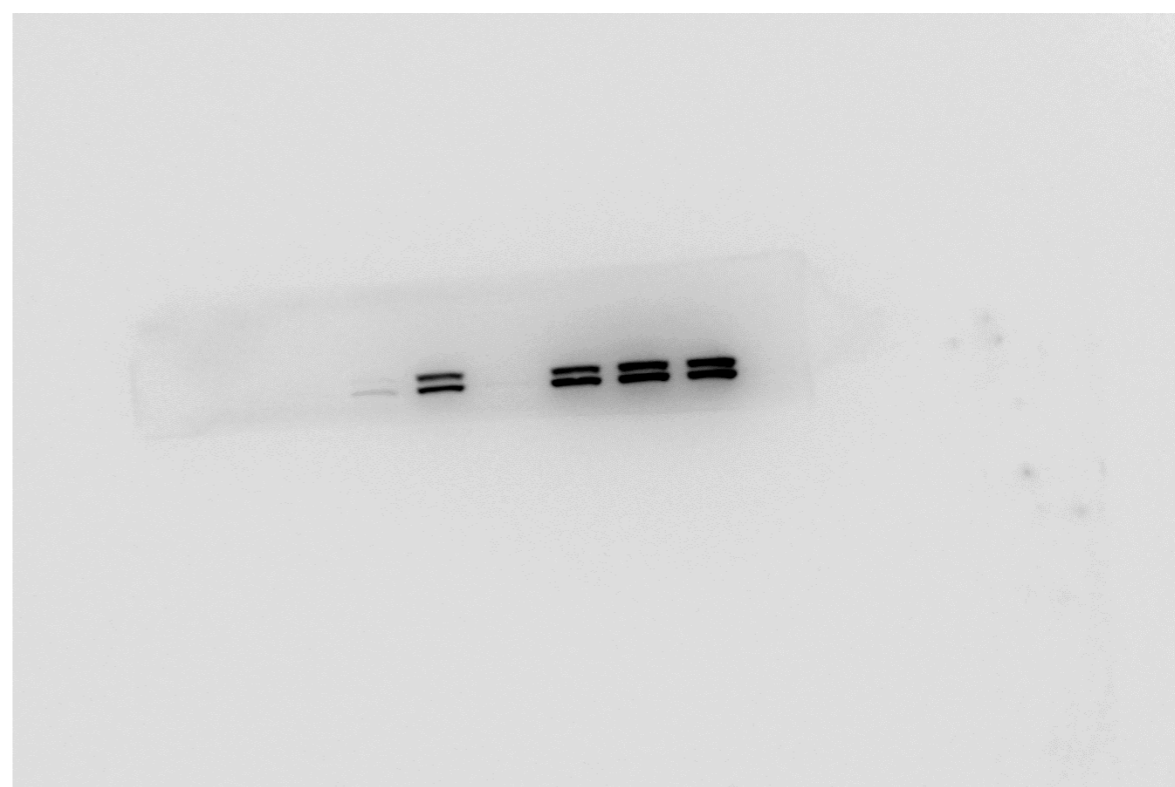

T-STAT1

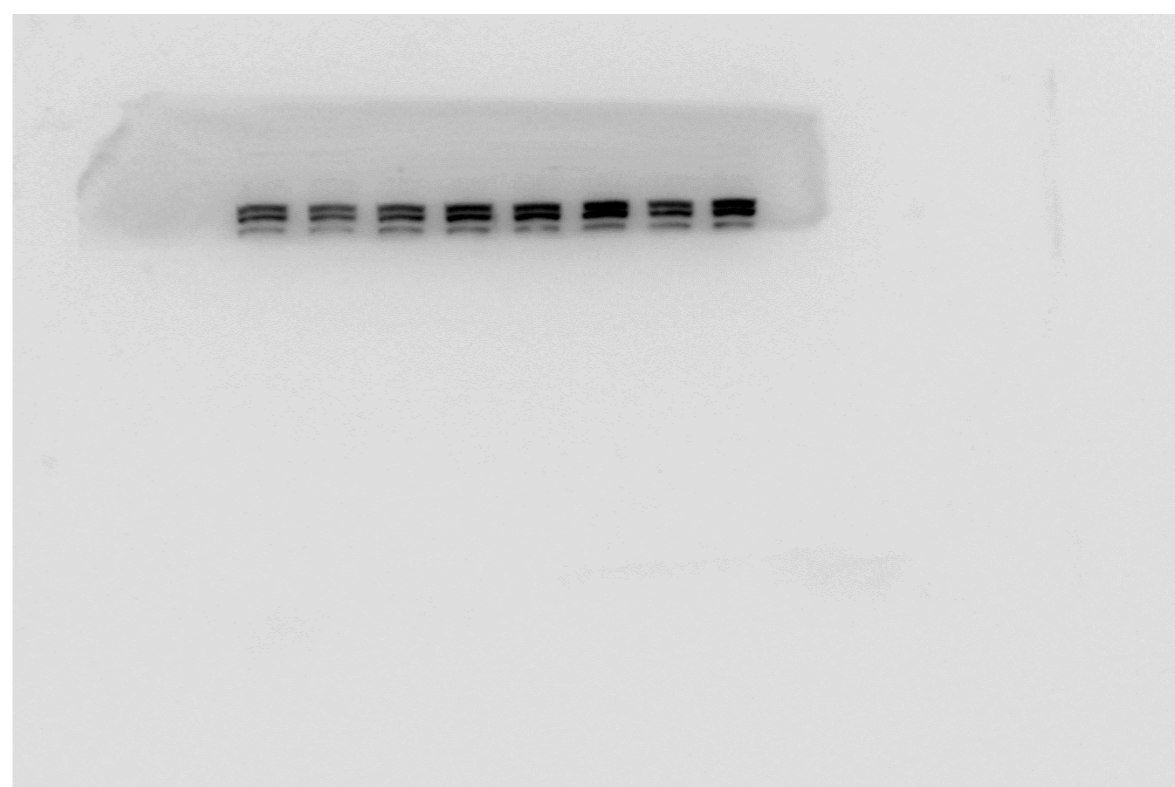

GAPDH

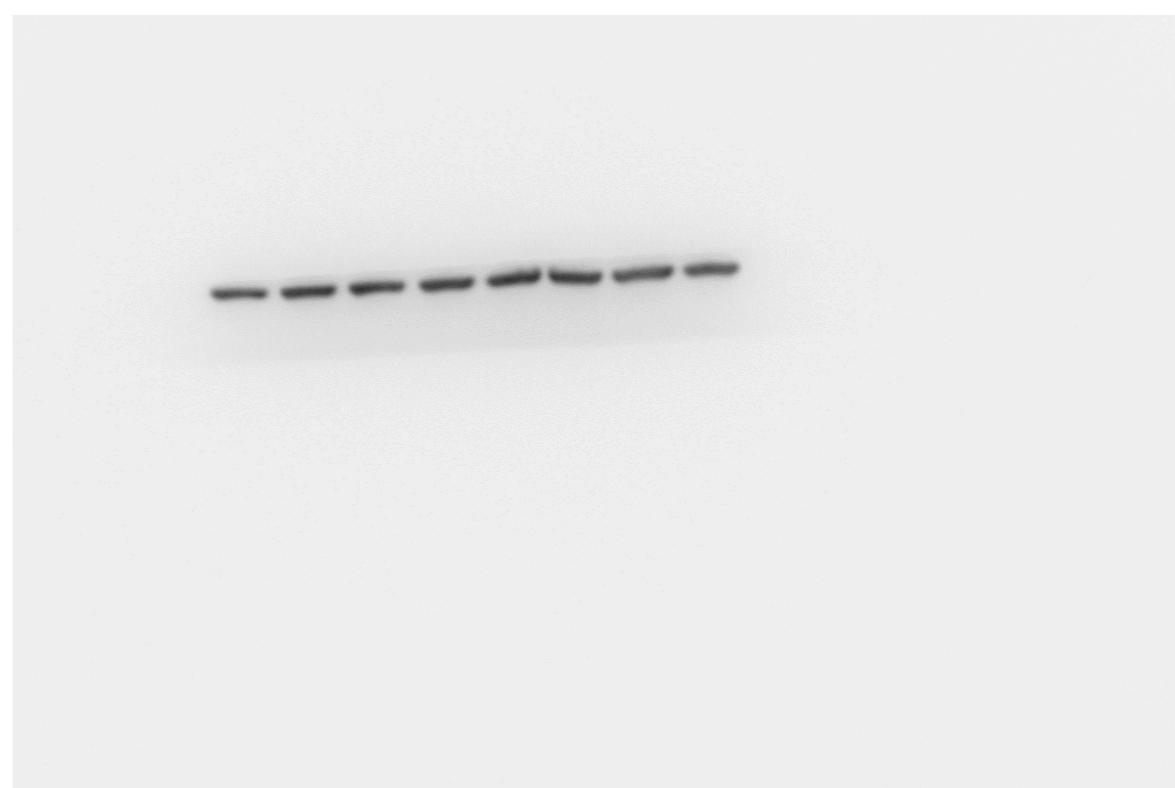

**Figure 5**

**b**

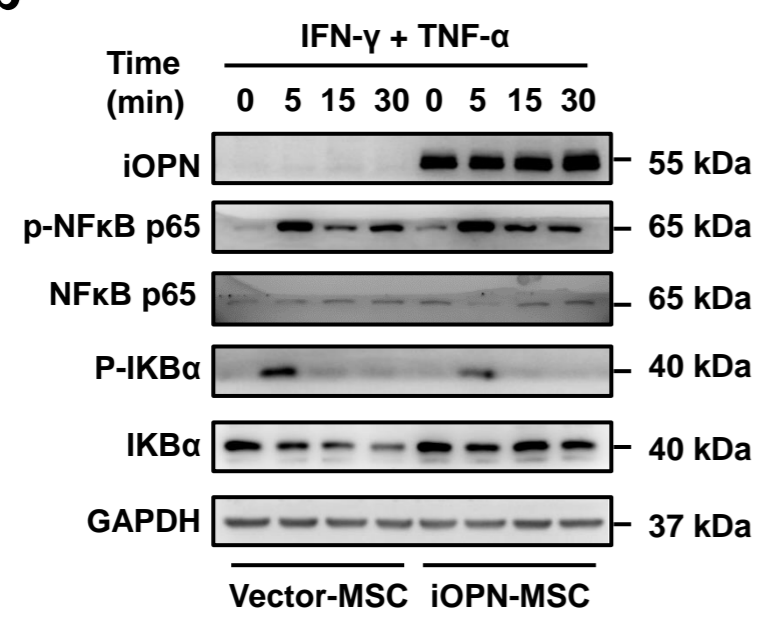

iOPN

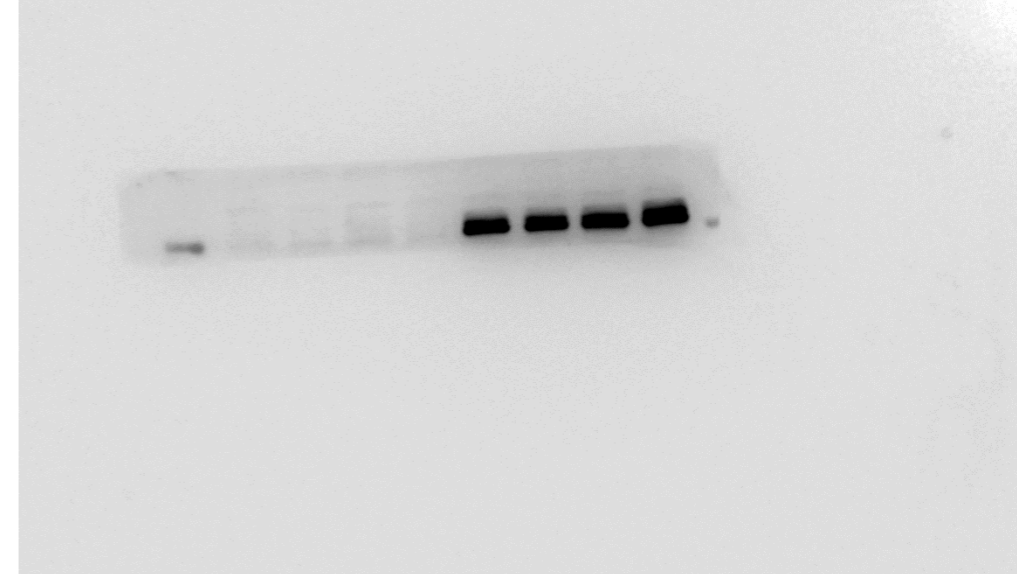

p-NF $\kappa$ B p65

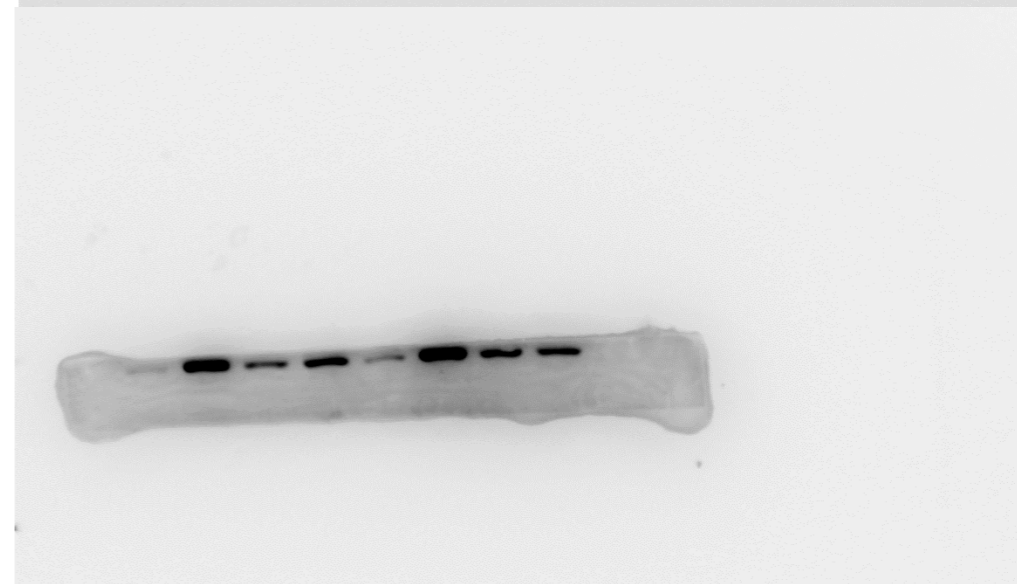

NF $\kappa$ B p65

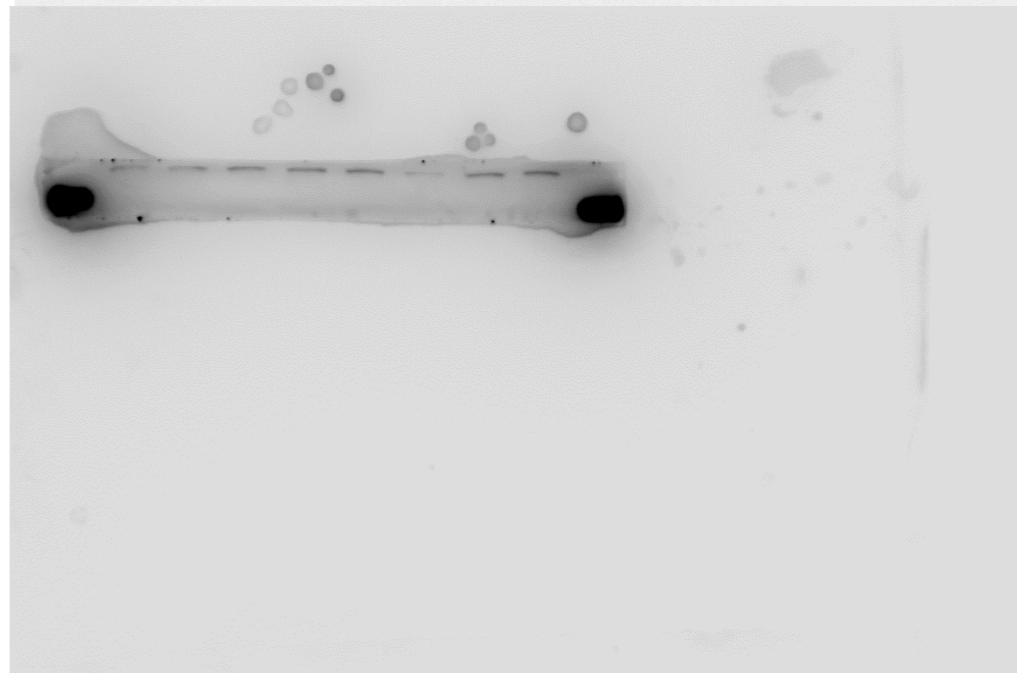

P-IK $\beta$

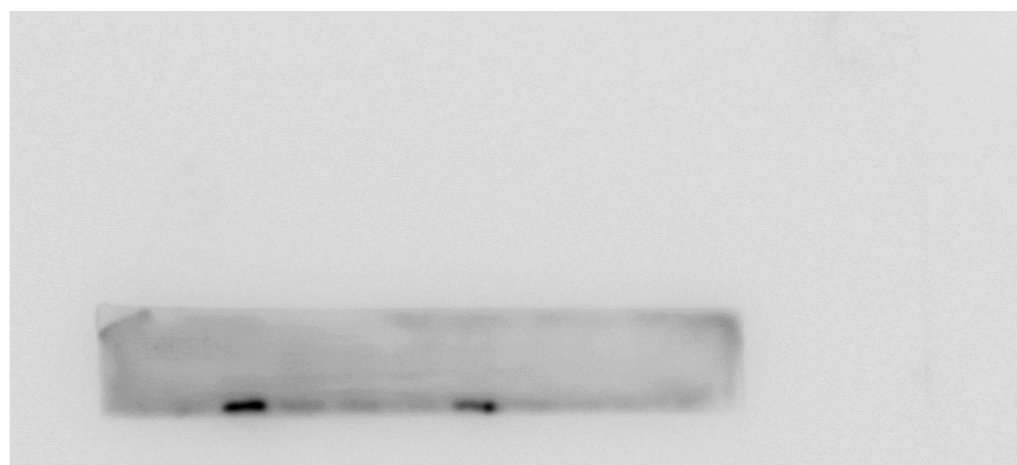

IK $\beta$

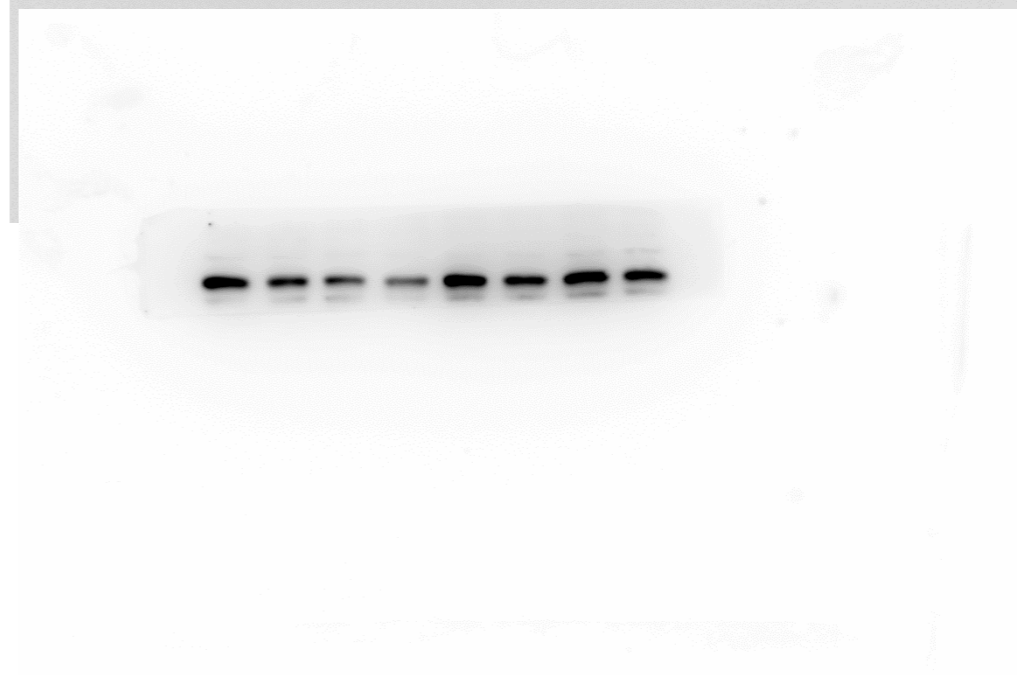

GAPDH

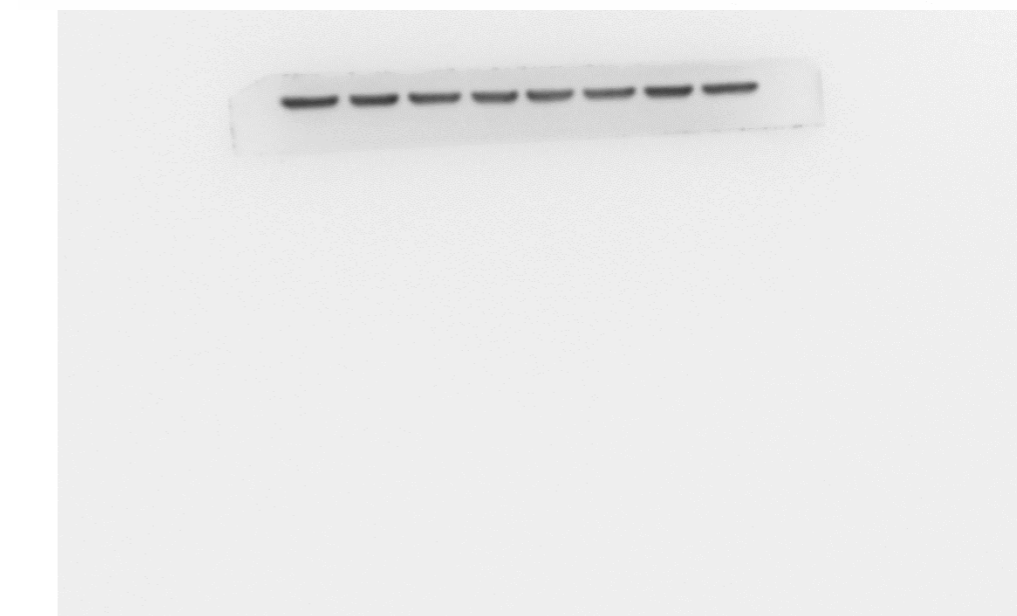



Figure 5

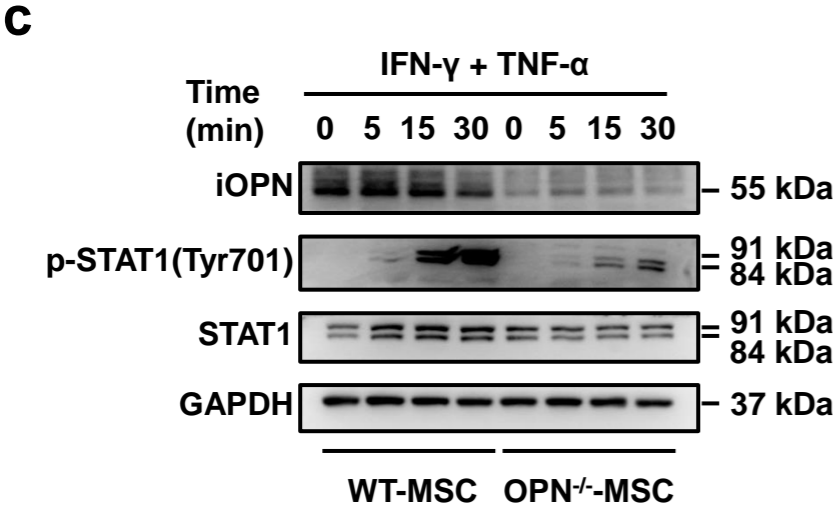

iOPN

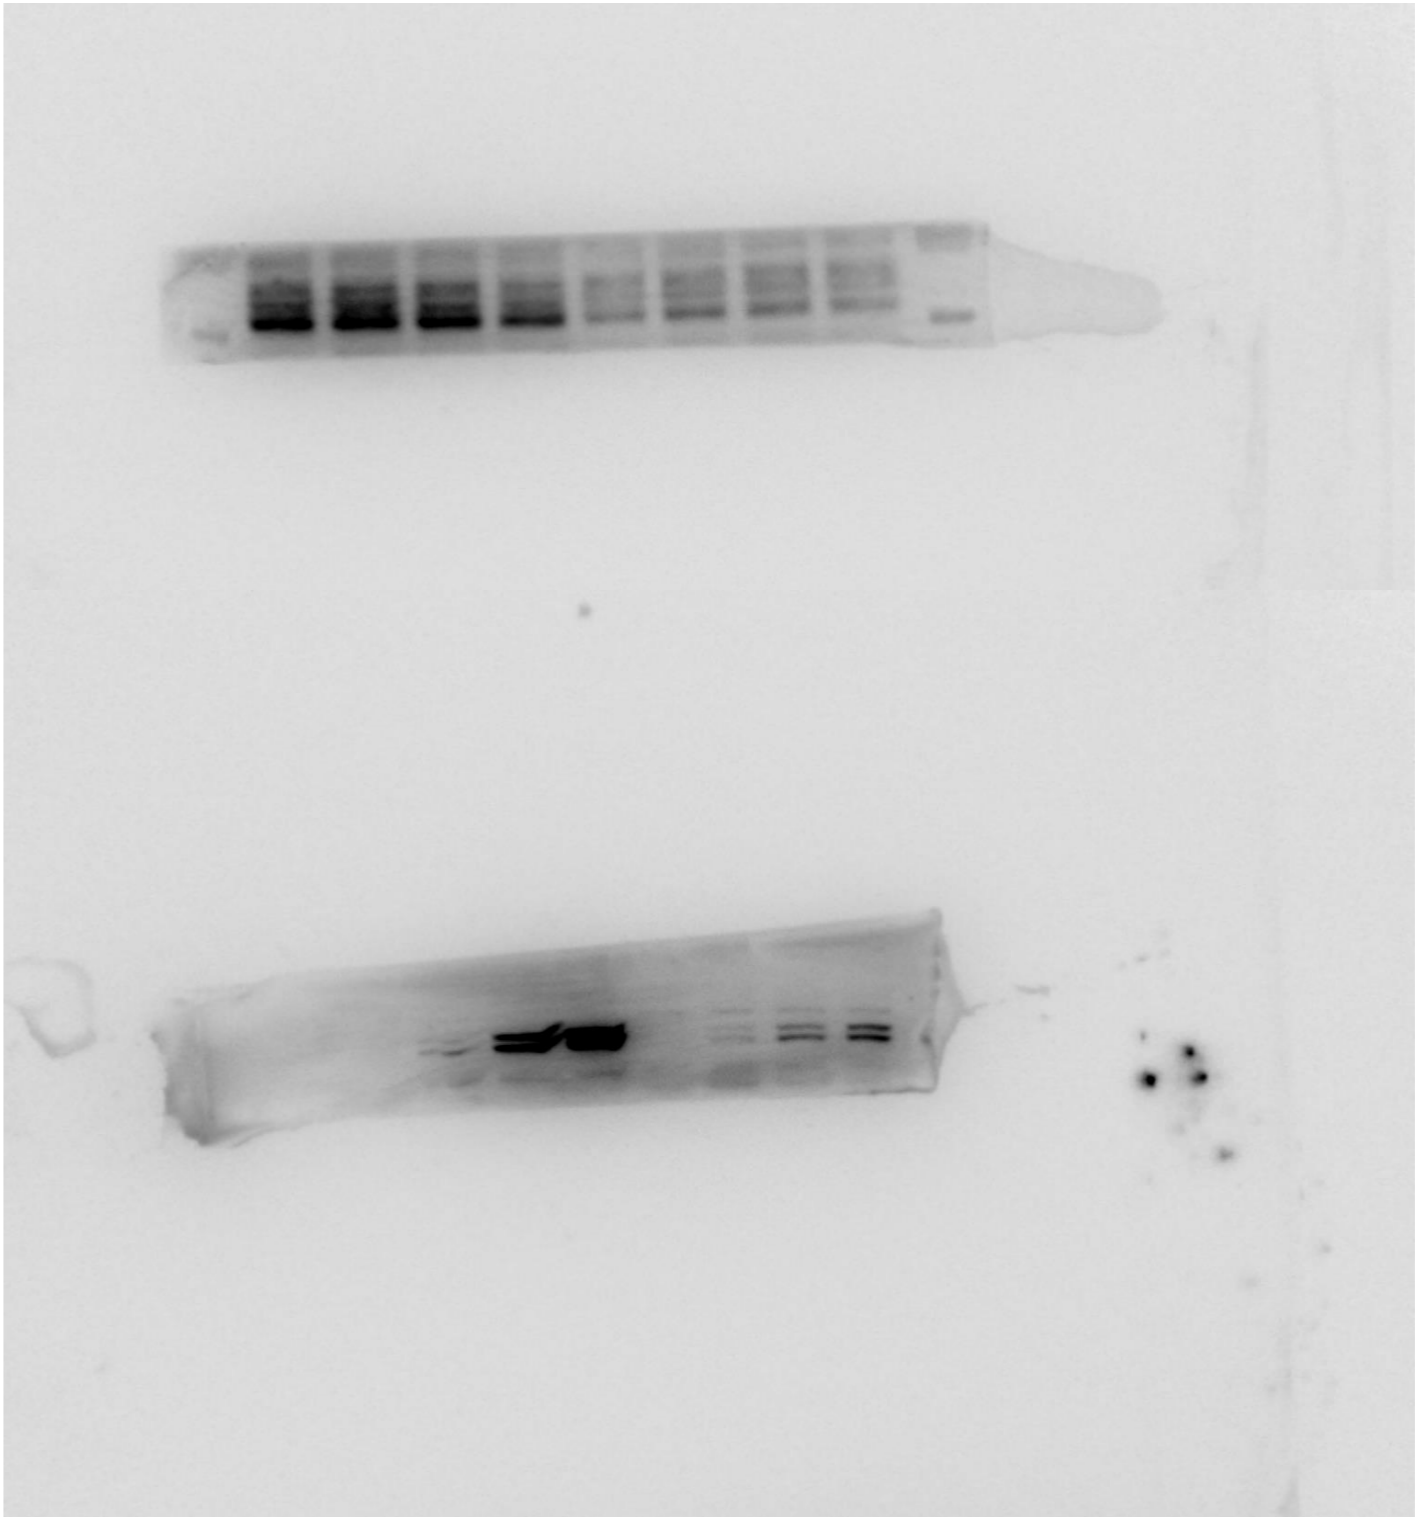

P-STAT1(Tyr701)

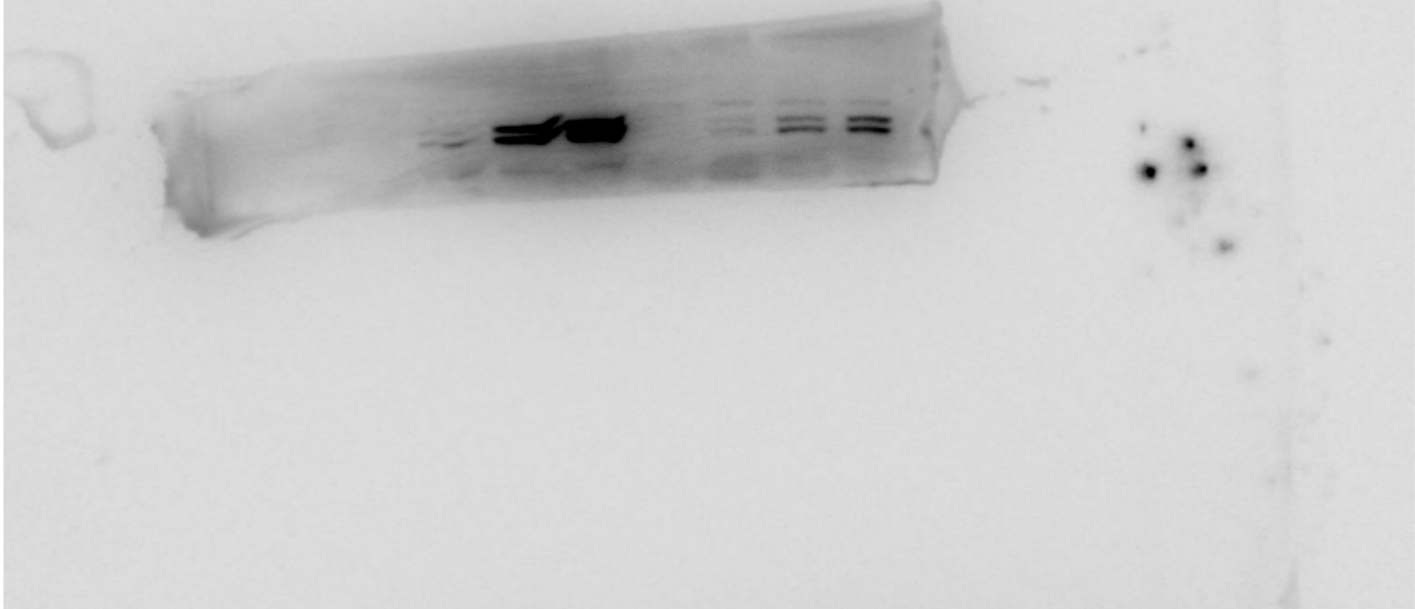

STAT1

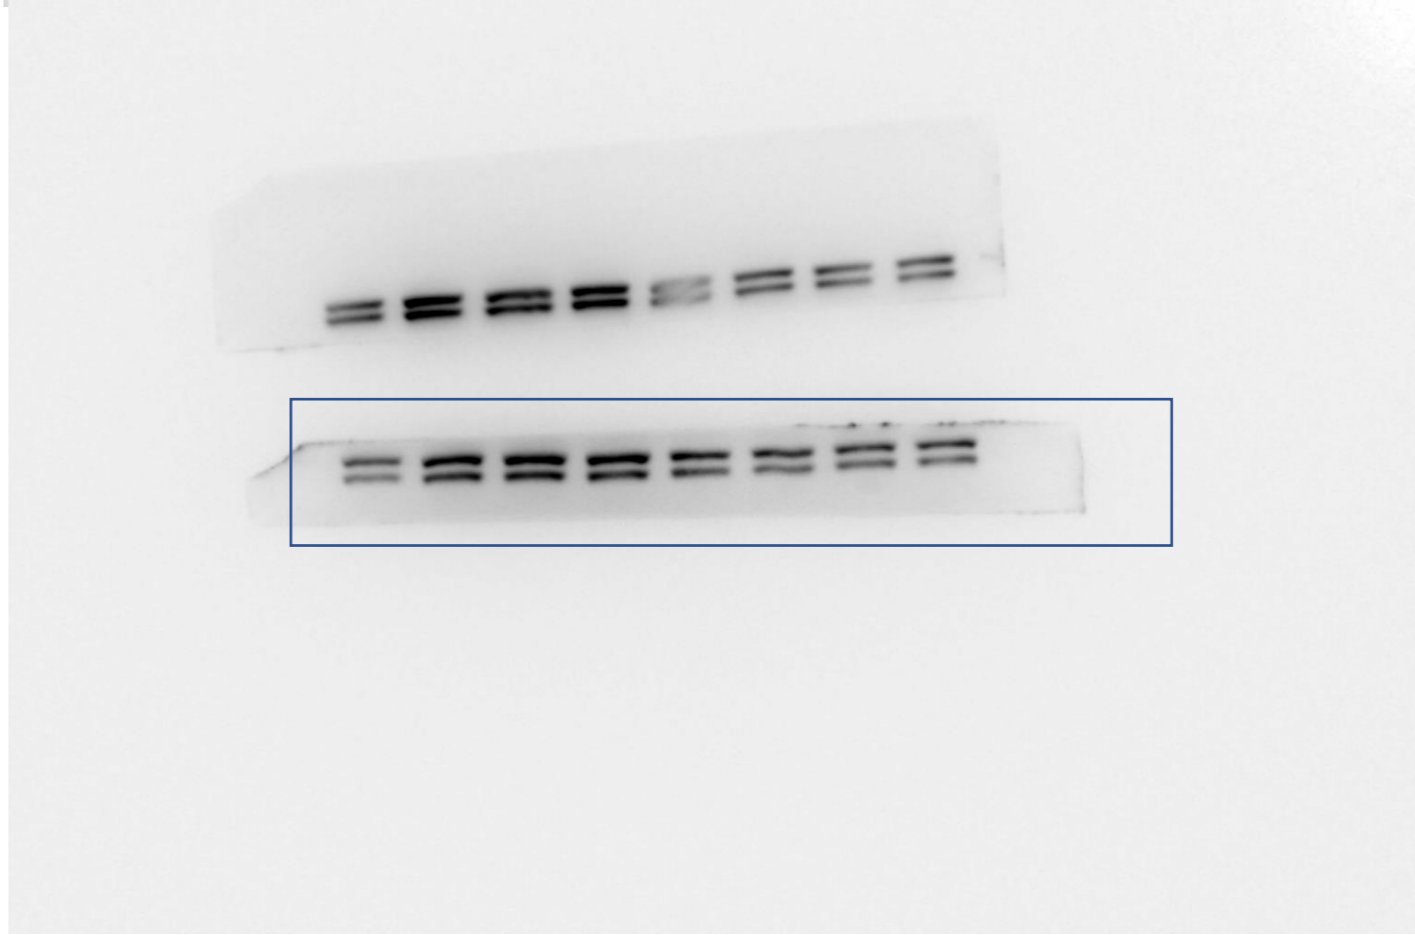

GAPDH

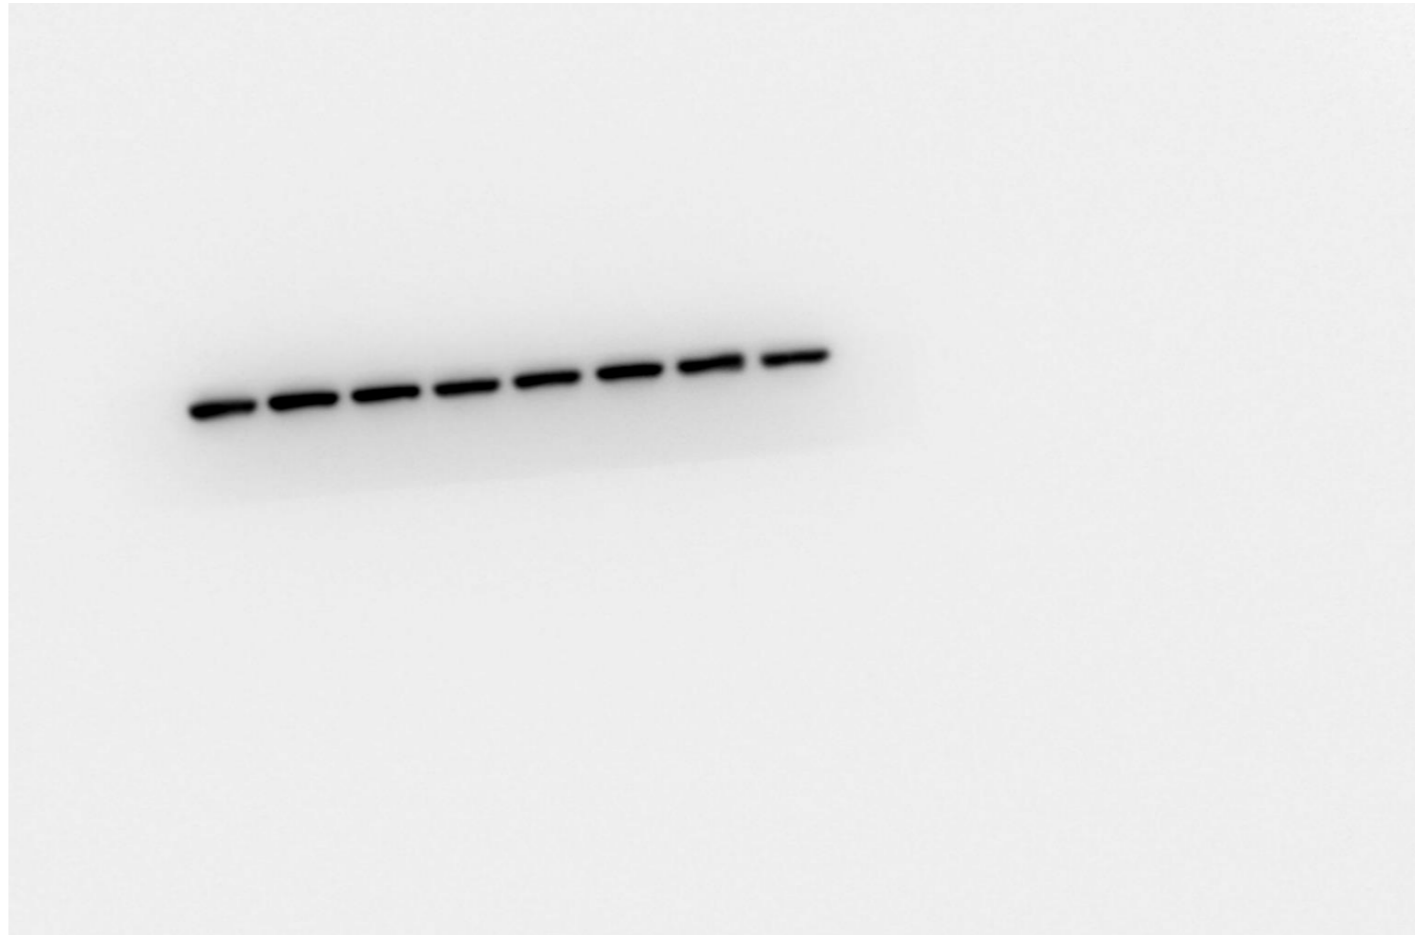



**Figure 5**

**d**

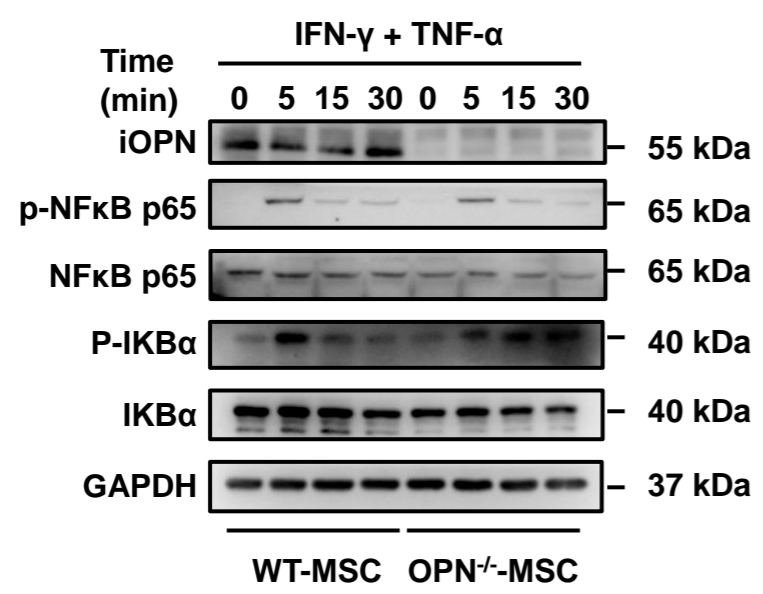

iOPN

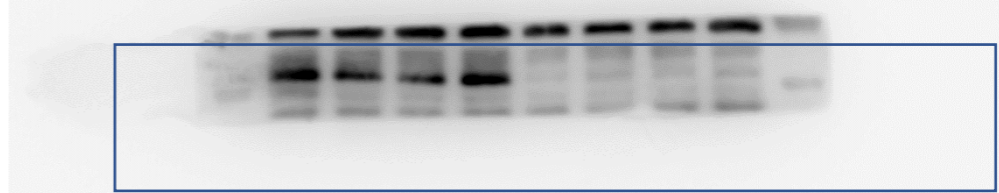

p-NF $\kappa$ B p65

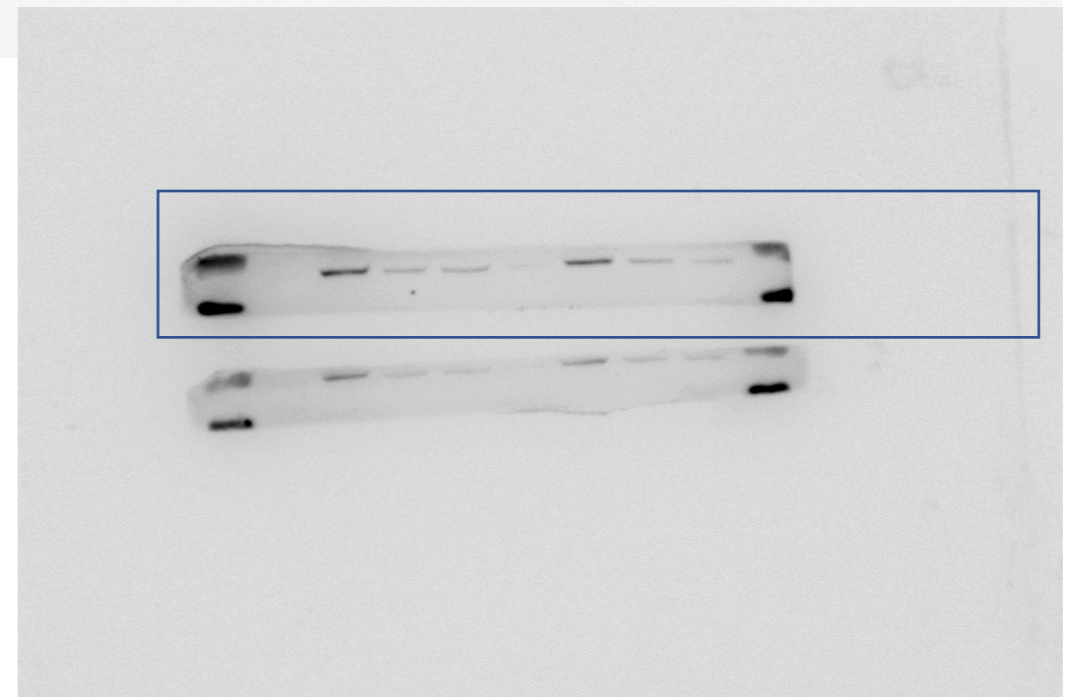

NF $\kappa$ B p65

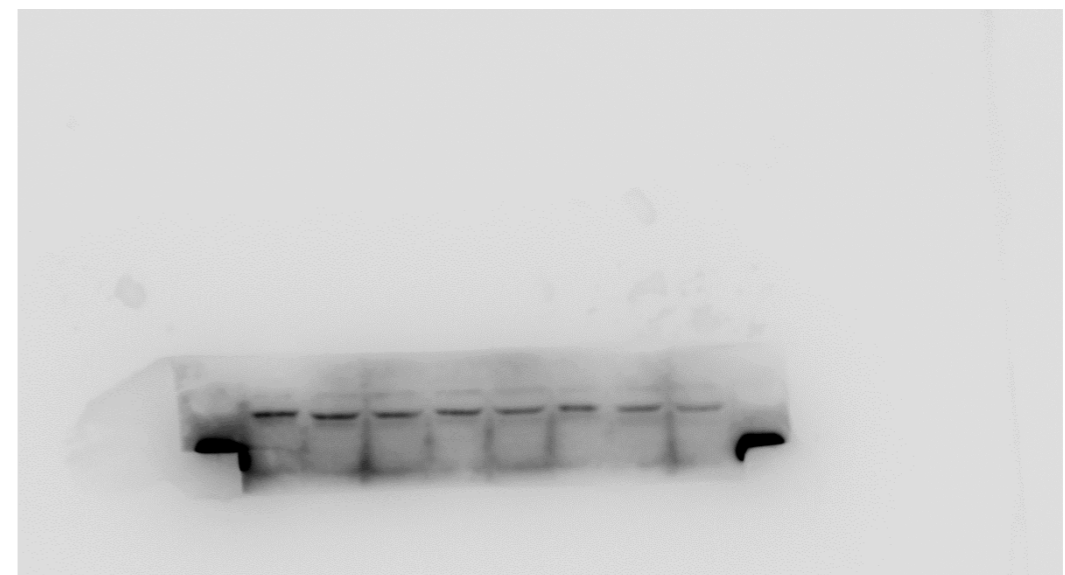

P-IK $\beta$

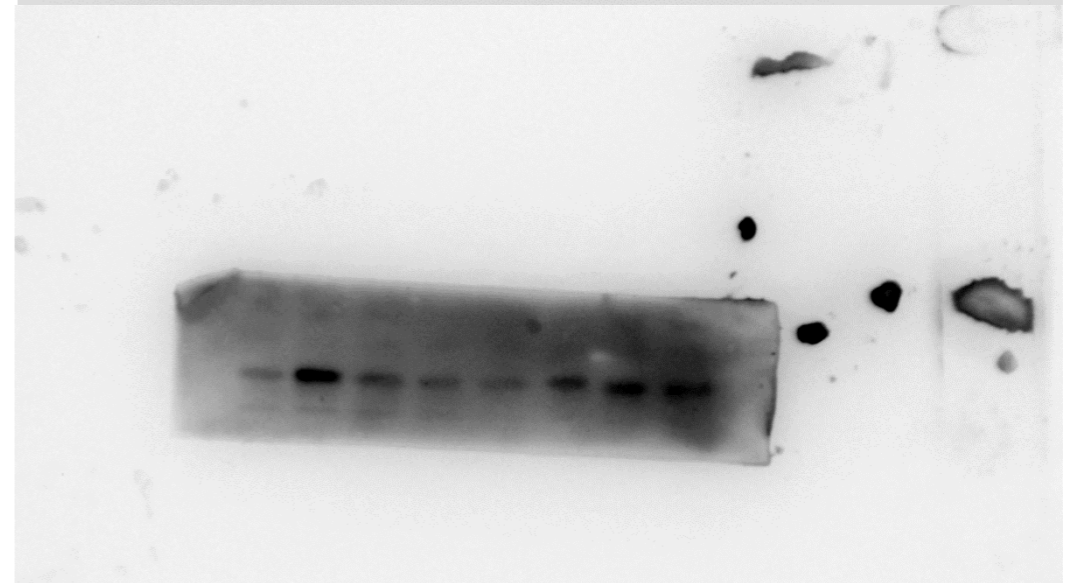

IK $\beta$

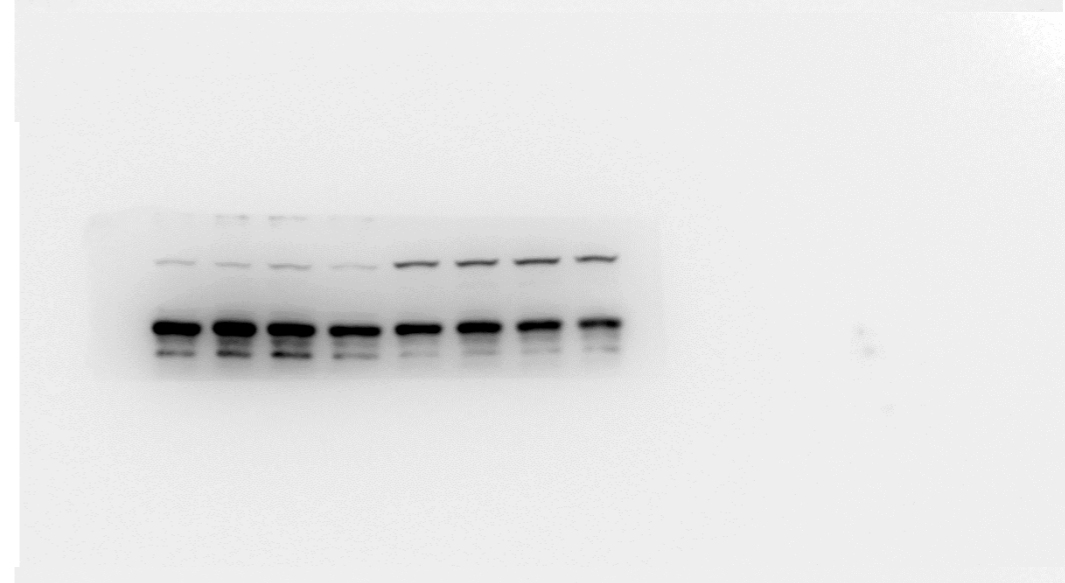

GAPDH

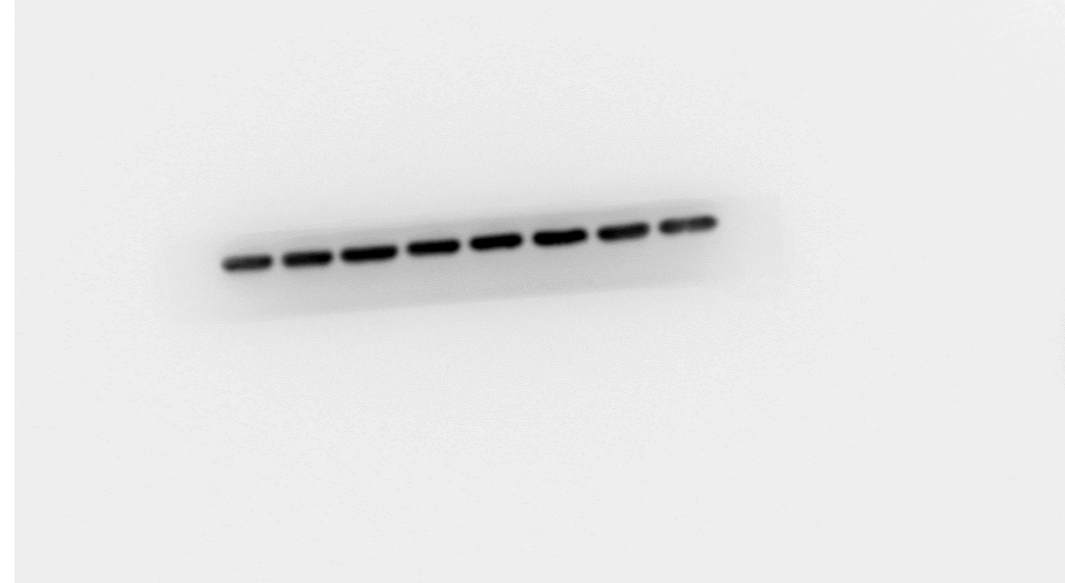

Figure 5

f

|                               | Vector-MSC |   |   | iOPN-MSC |   |   |         |
|-------------------------------|------------|---|---|----------|---|---|---------|
| TNF- $\alpha$ + IFN- $\gamma$ | -          | + | + | -        | + | + |         |
| Flu                           | -          | - | + | -        | - | + |         |
| iNOS                          |            |   |   |          |   |   | 130 kDa |
| GAPDH                         |            |   |   |          |   |   | 37 kDa  |

iNOS

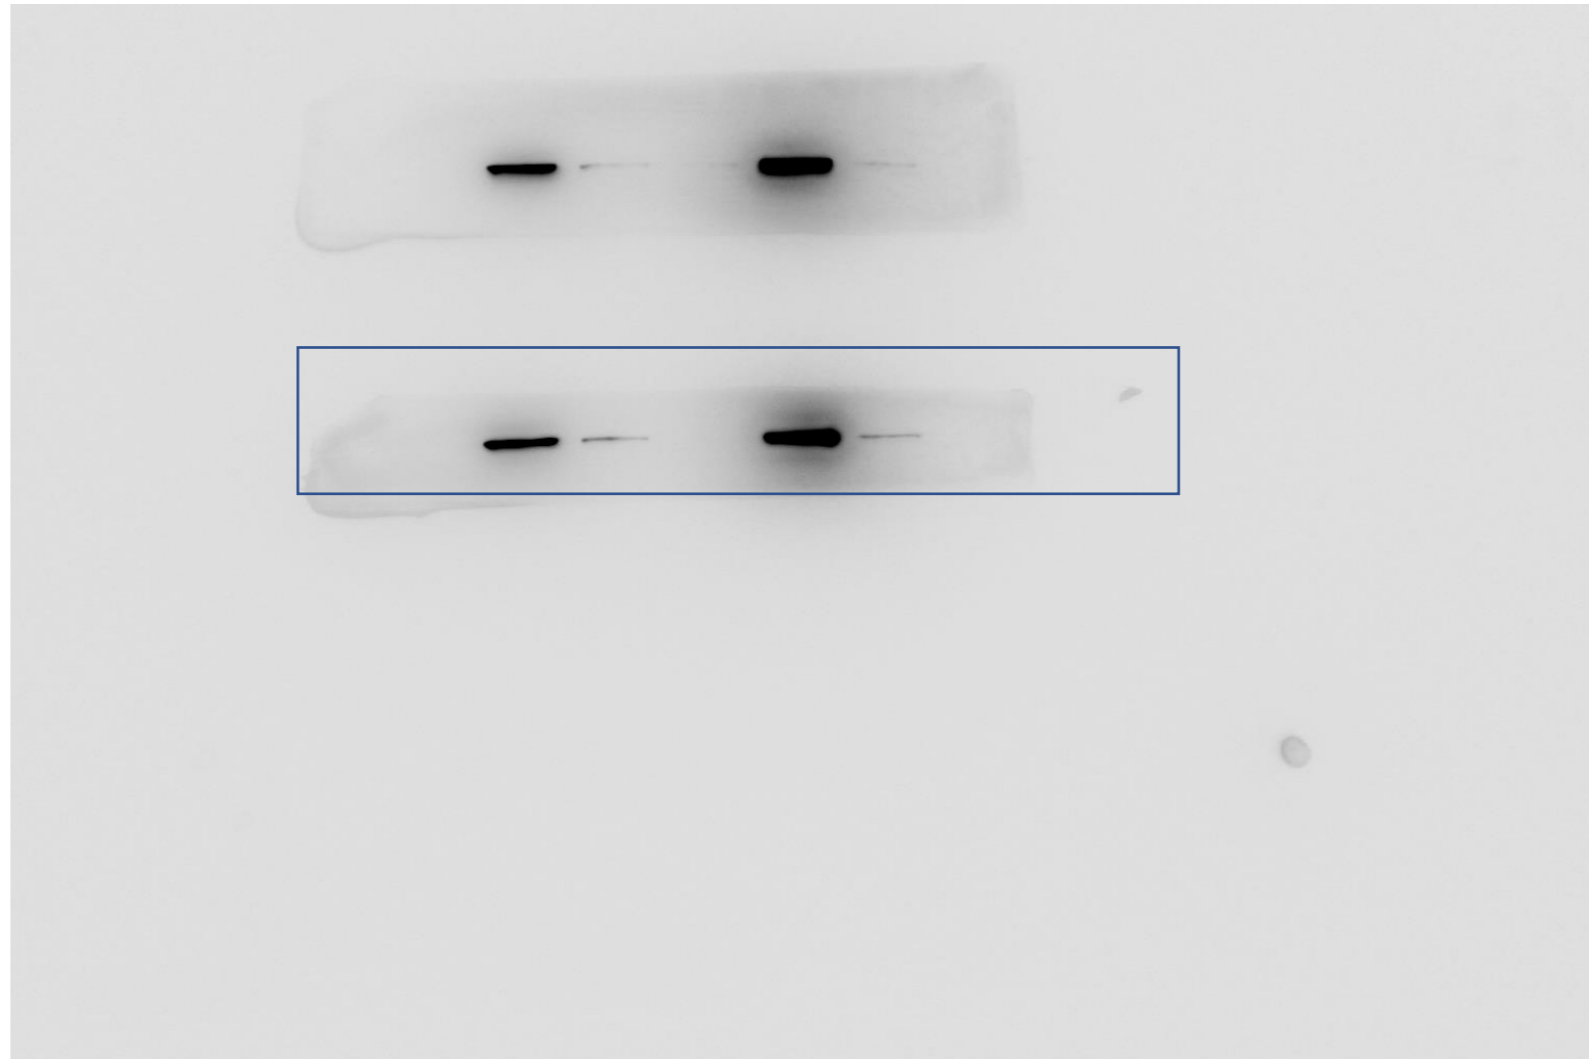

GAPDH

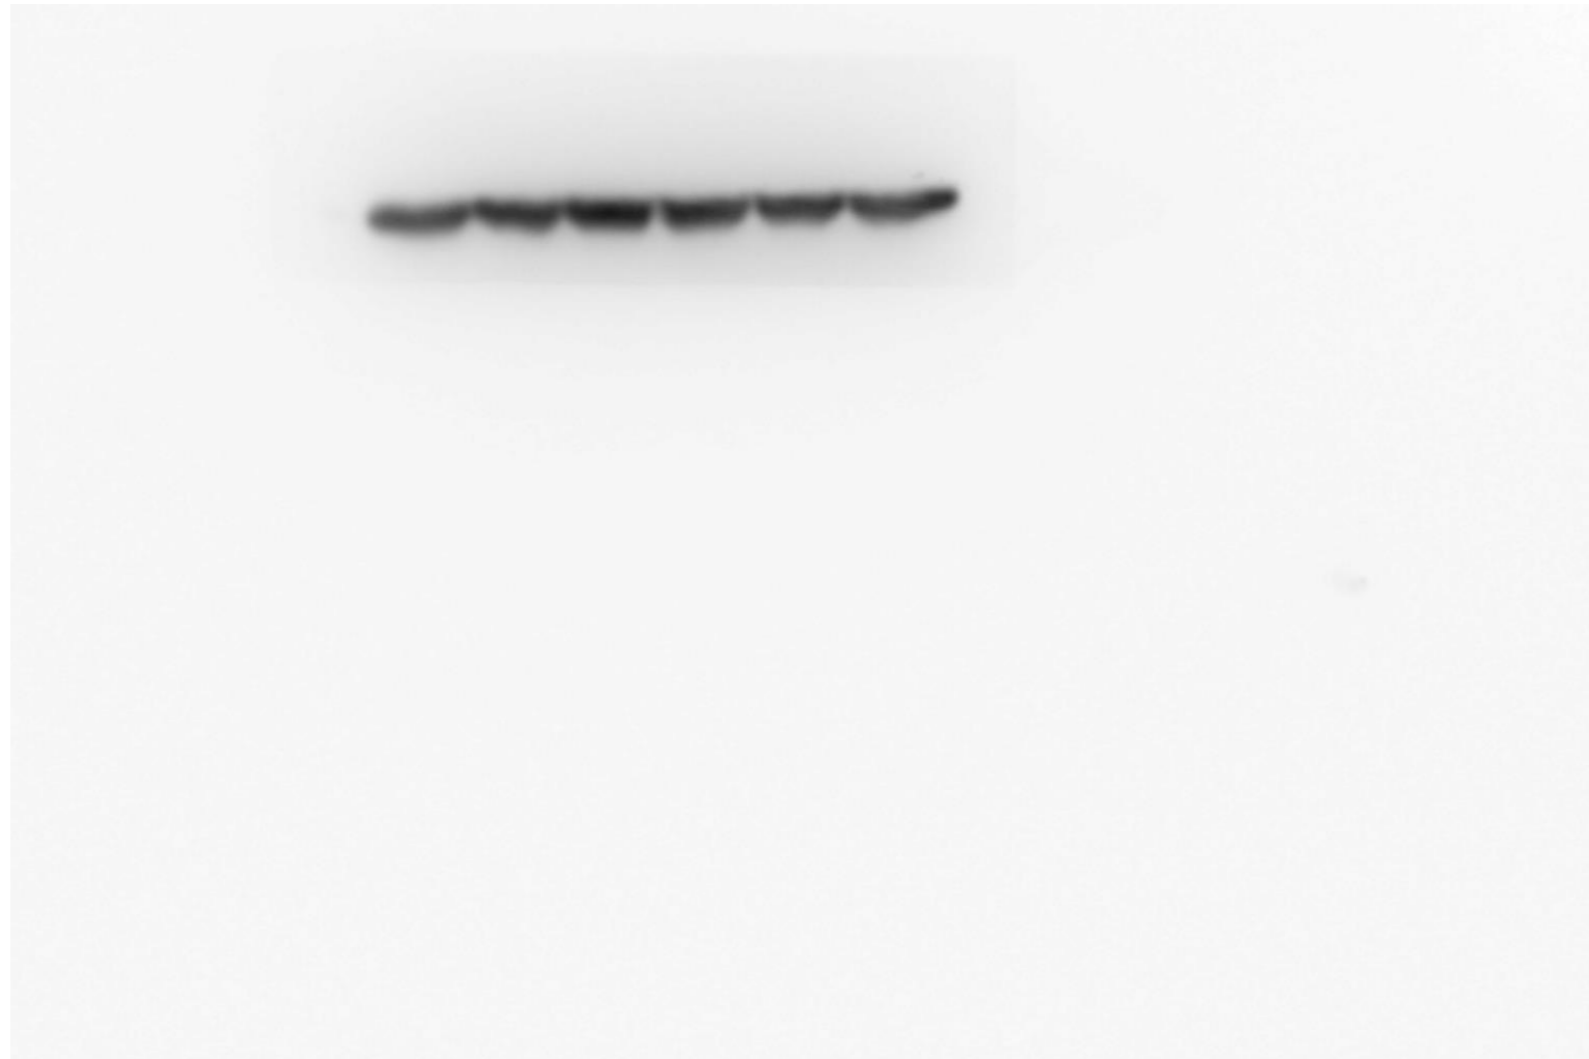



**Figure 6**

**a**

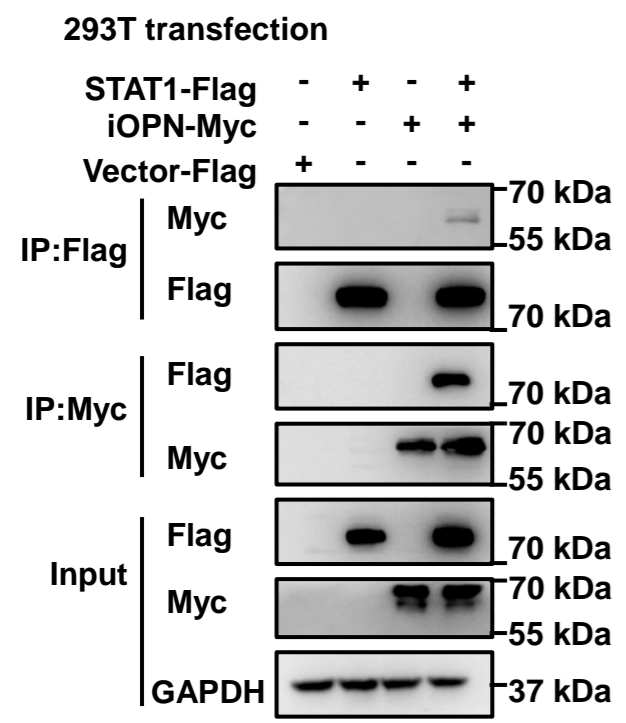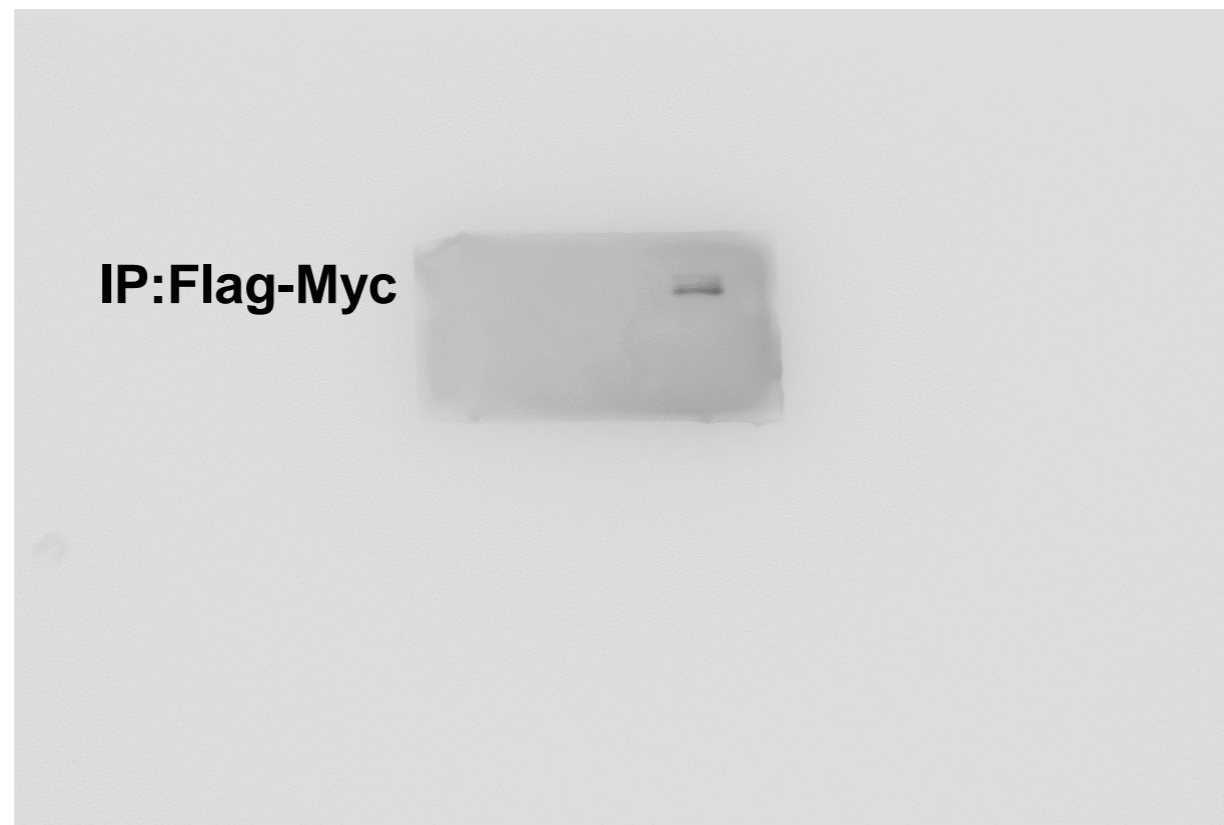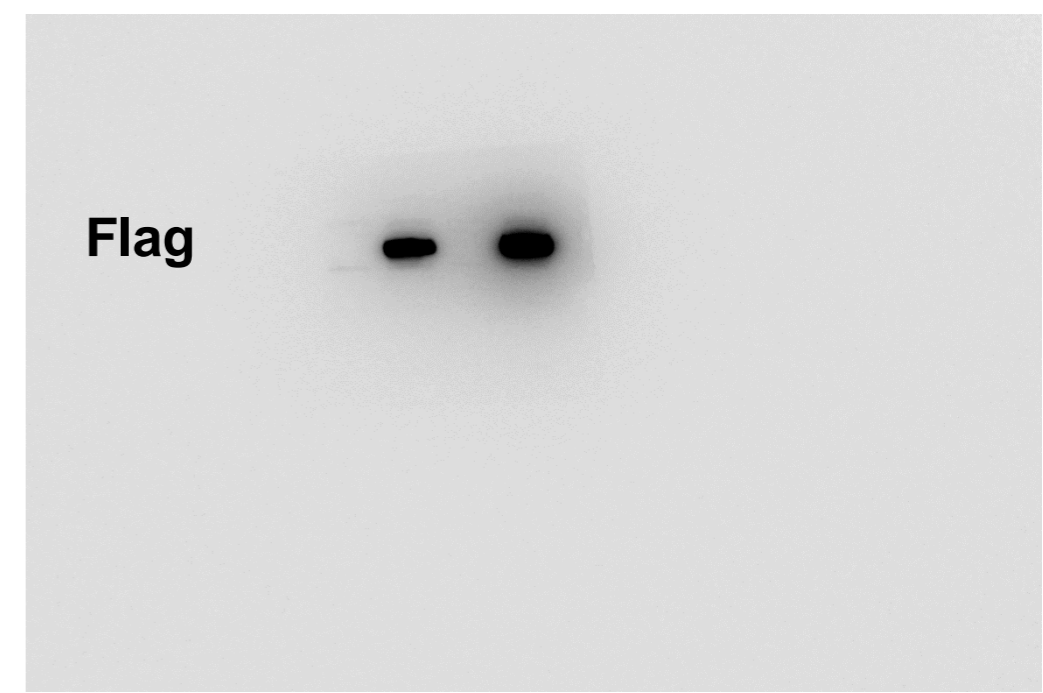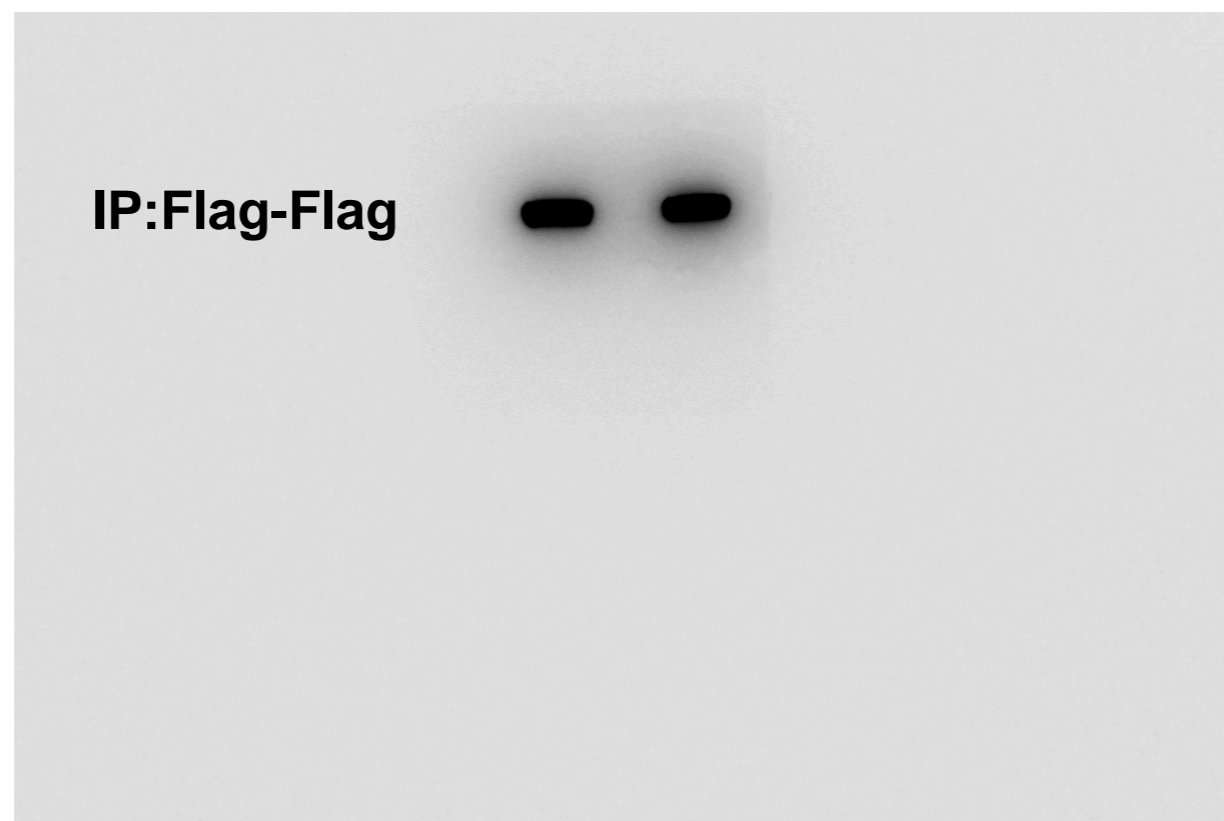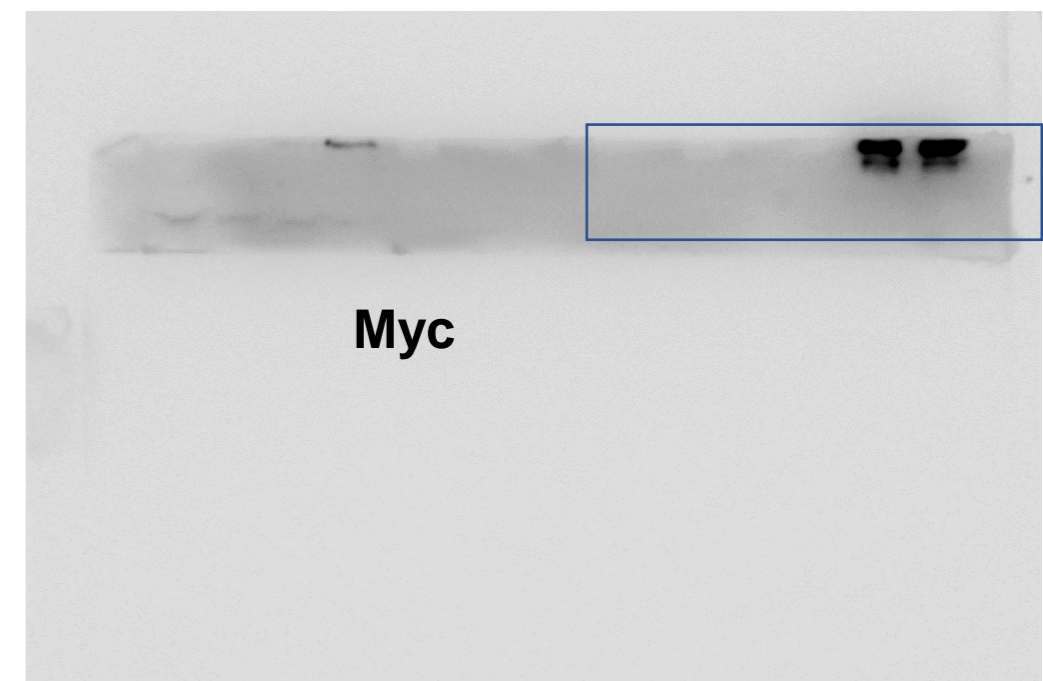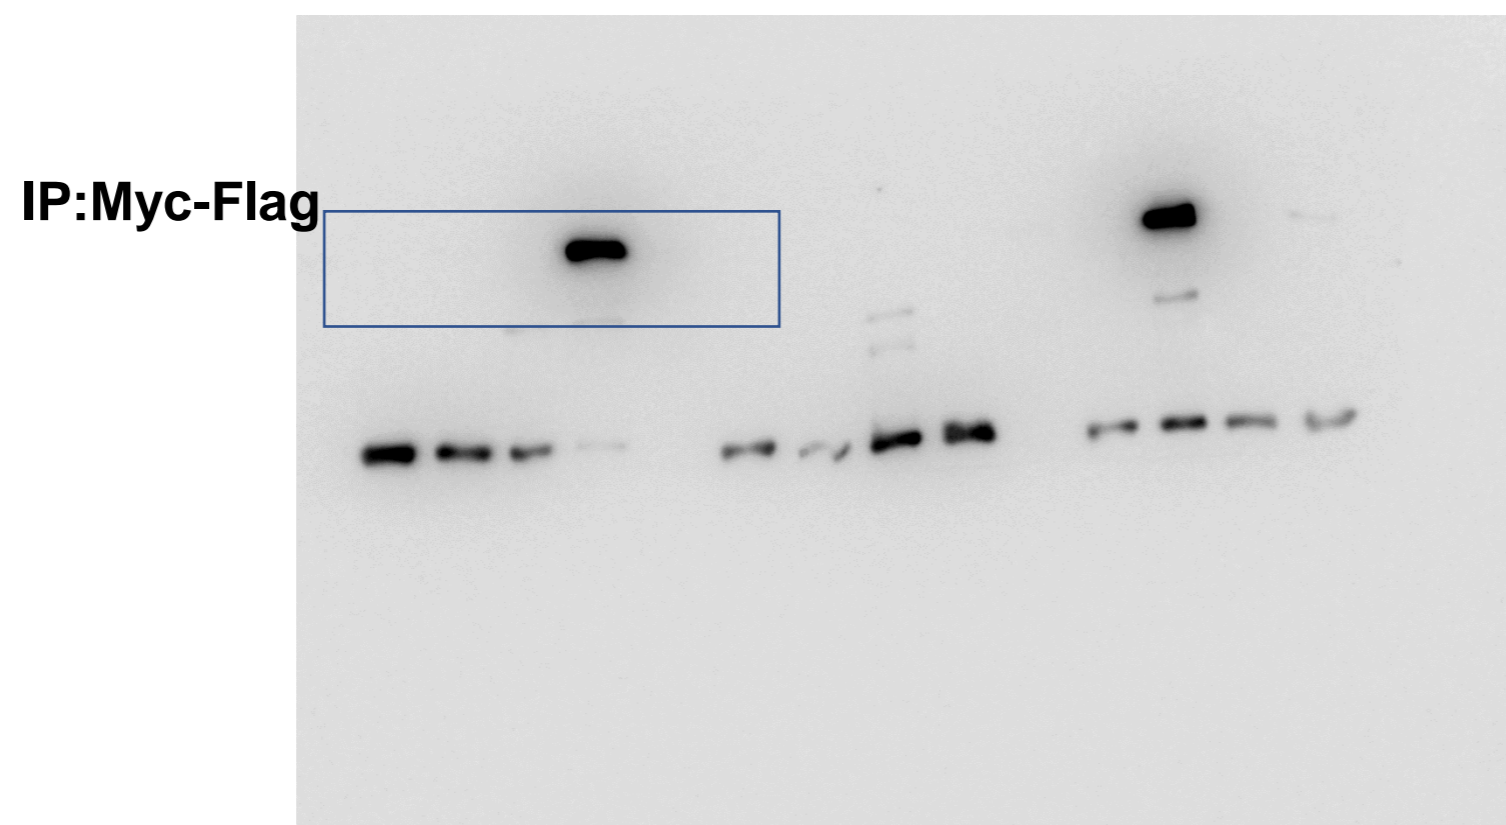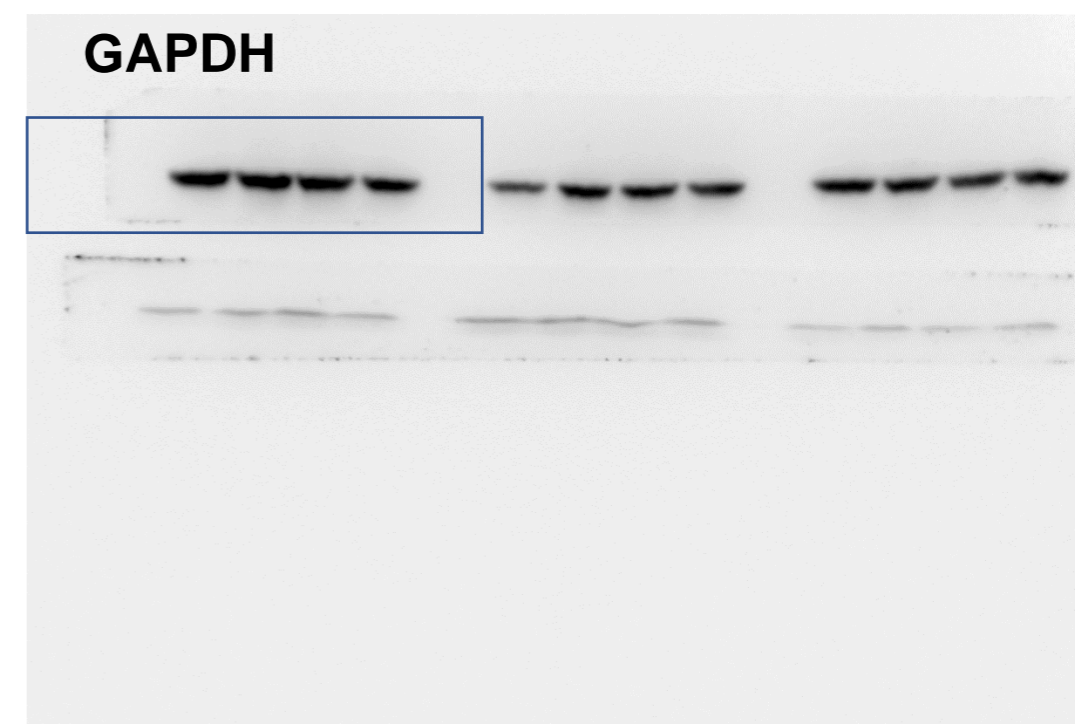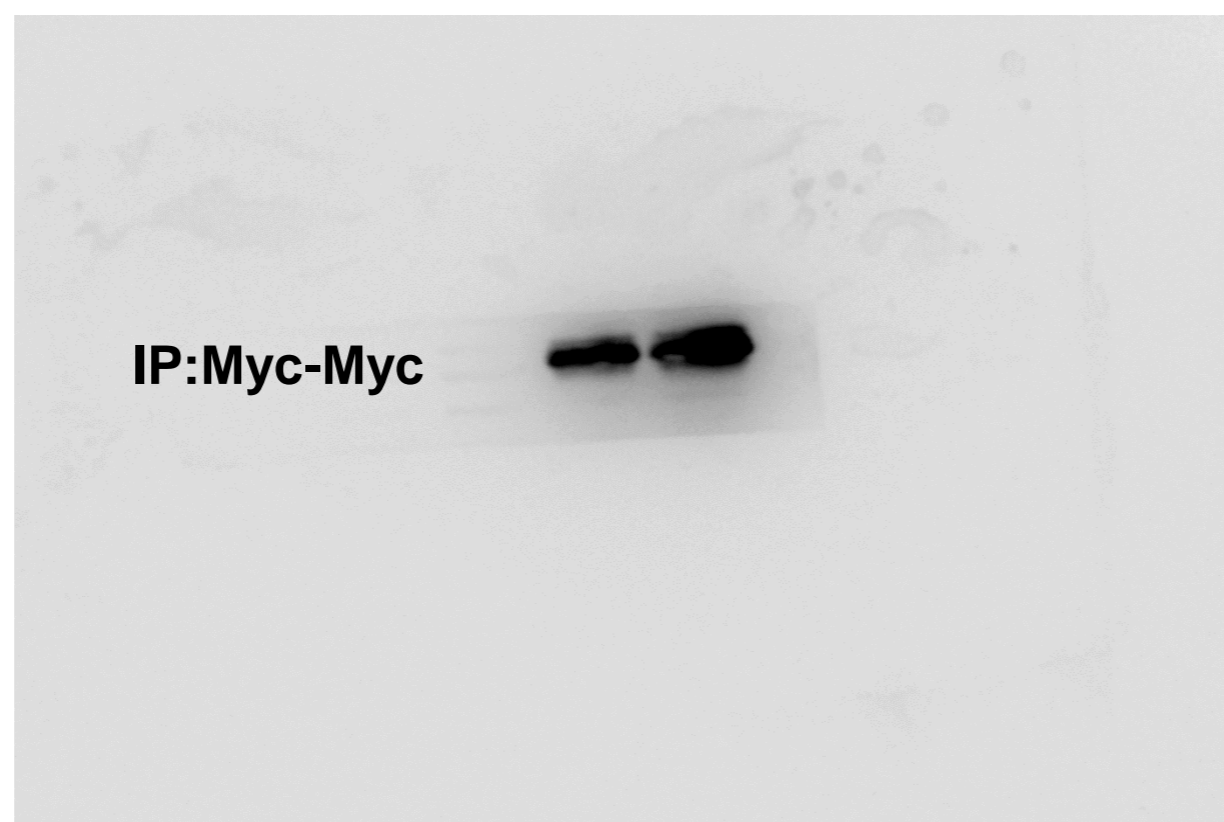



**Figure 6**

**b**

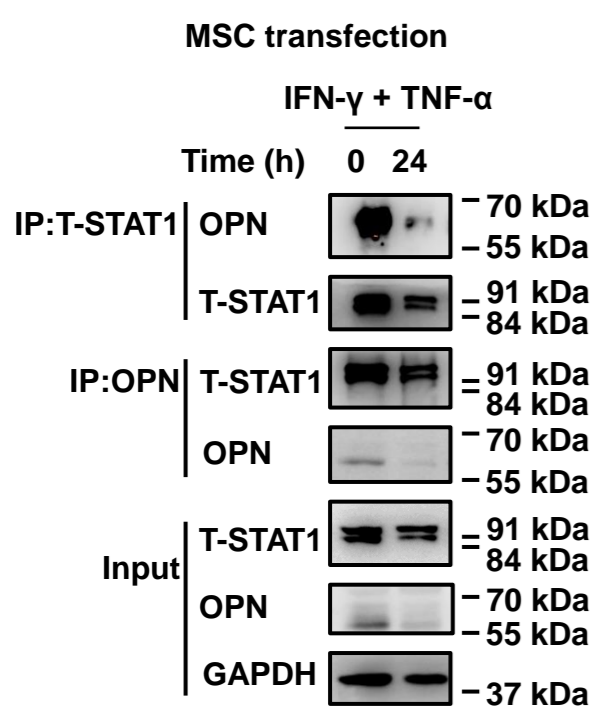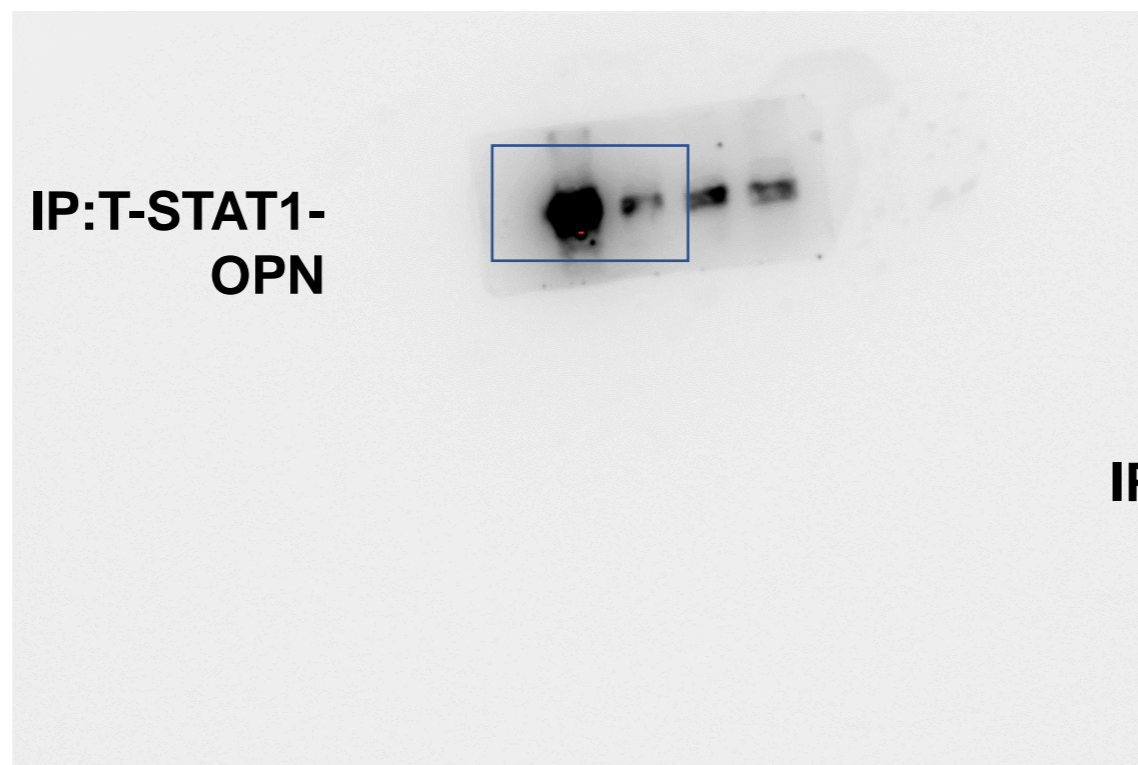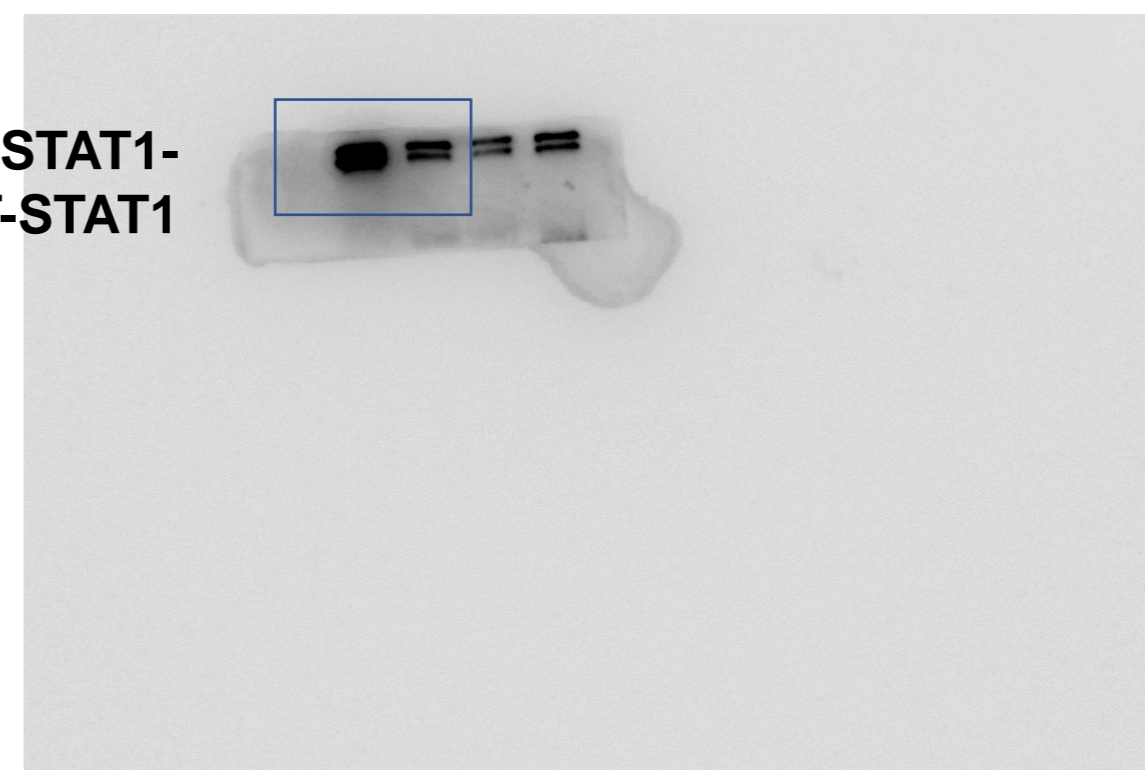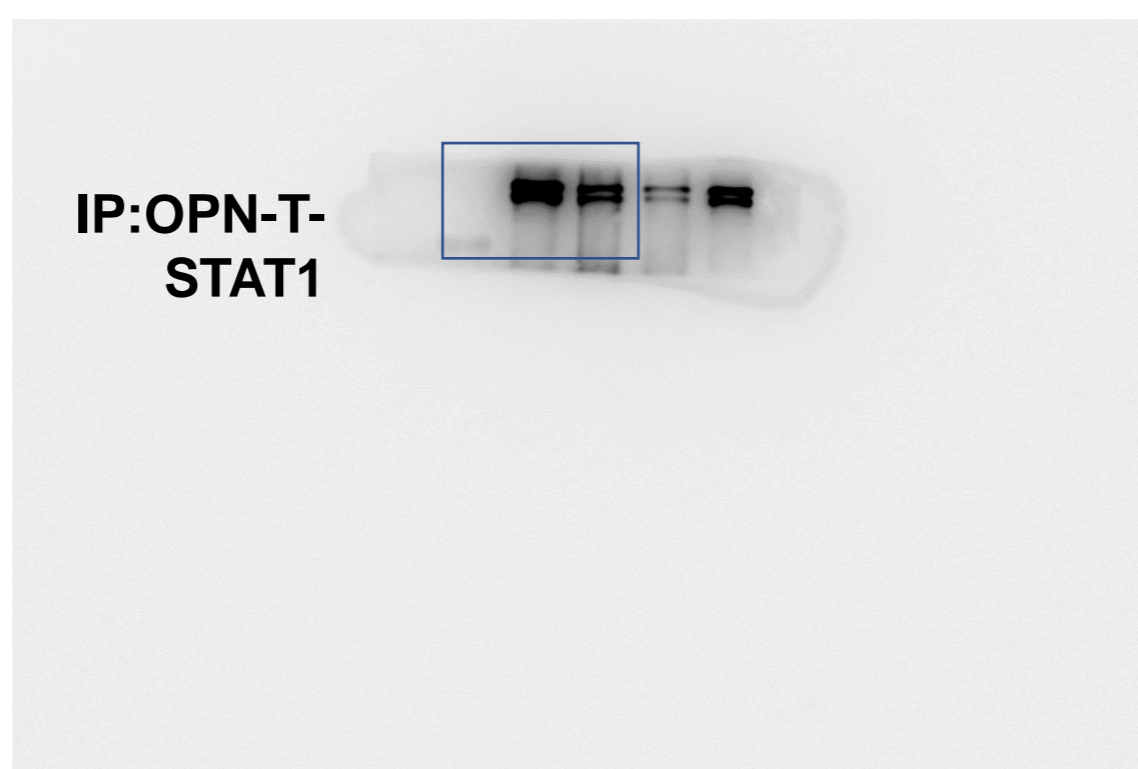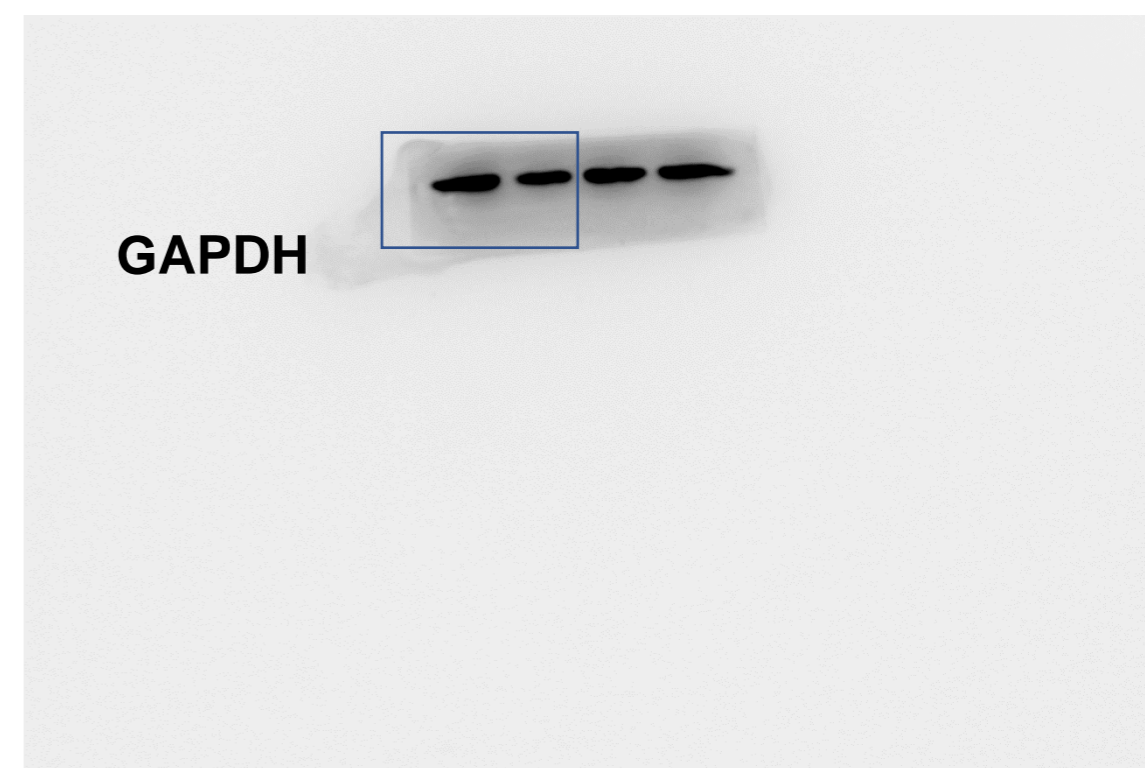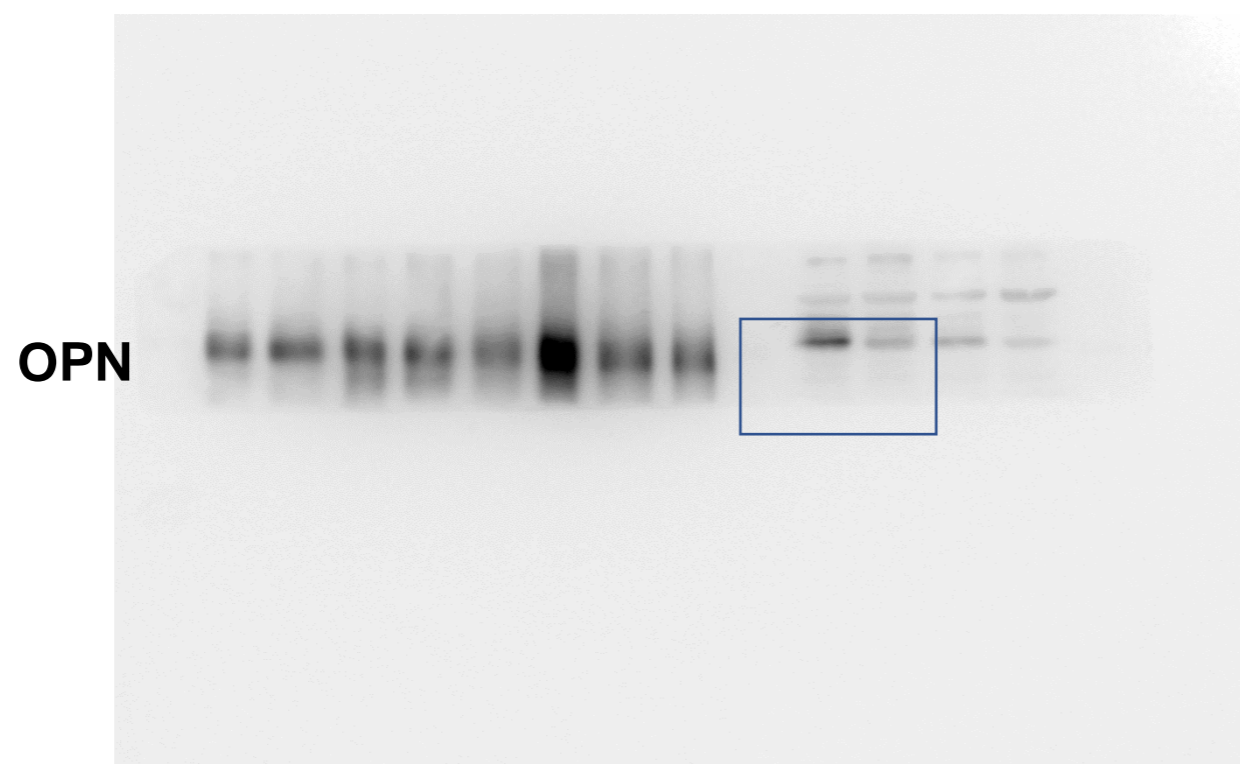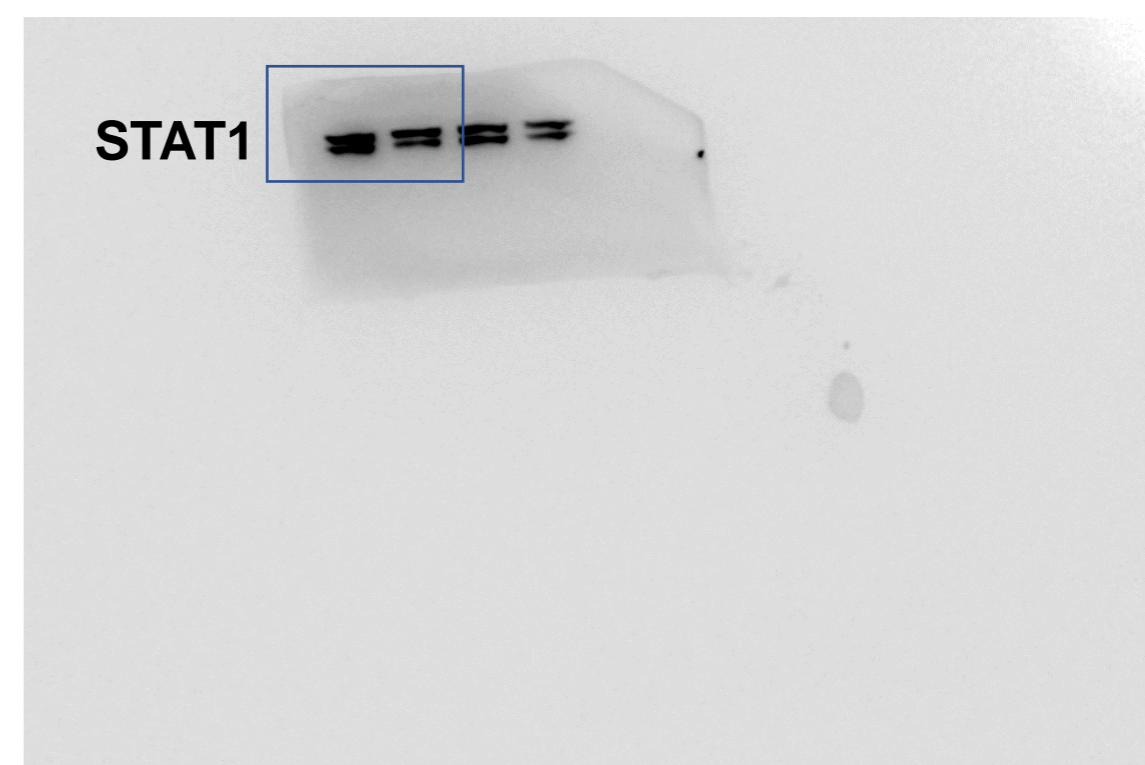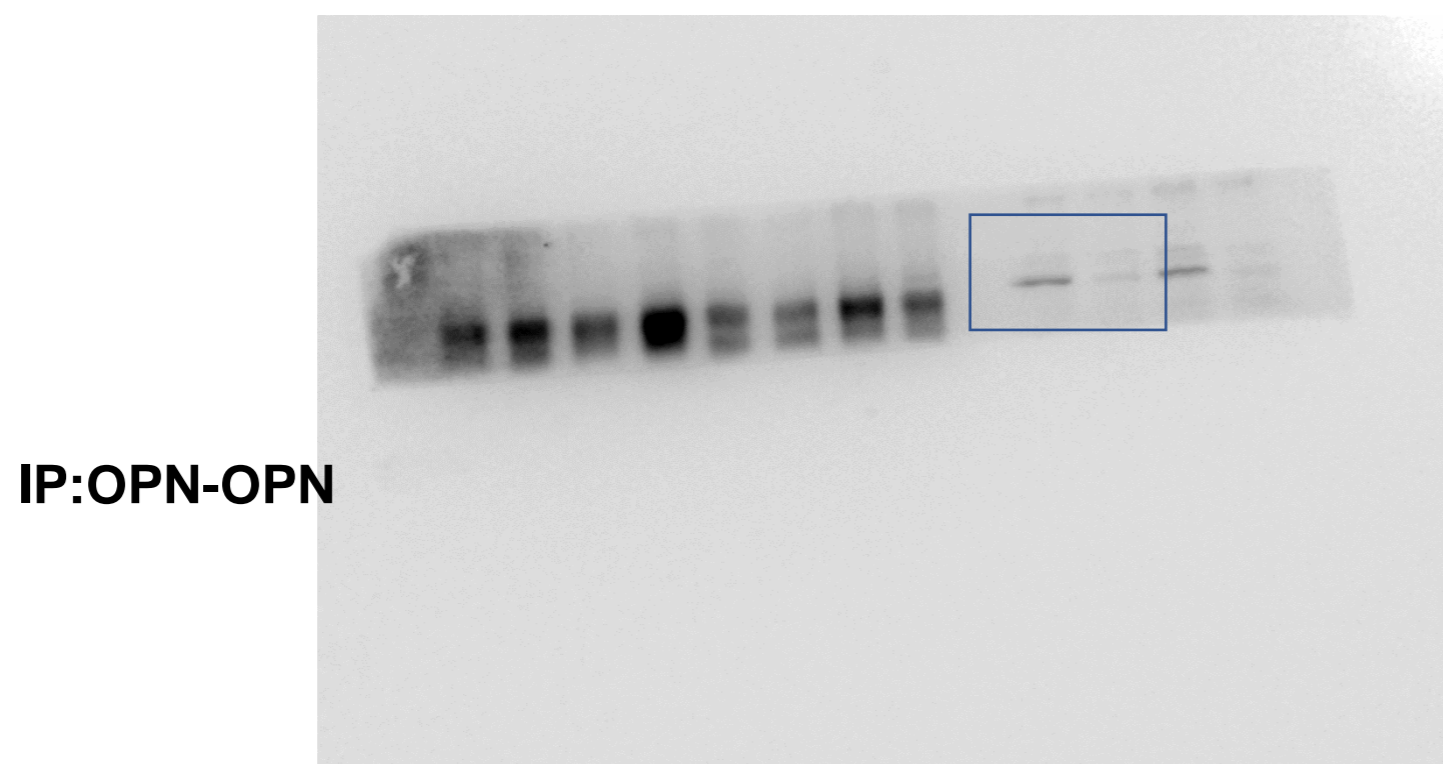



**Figure 6**

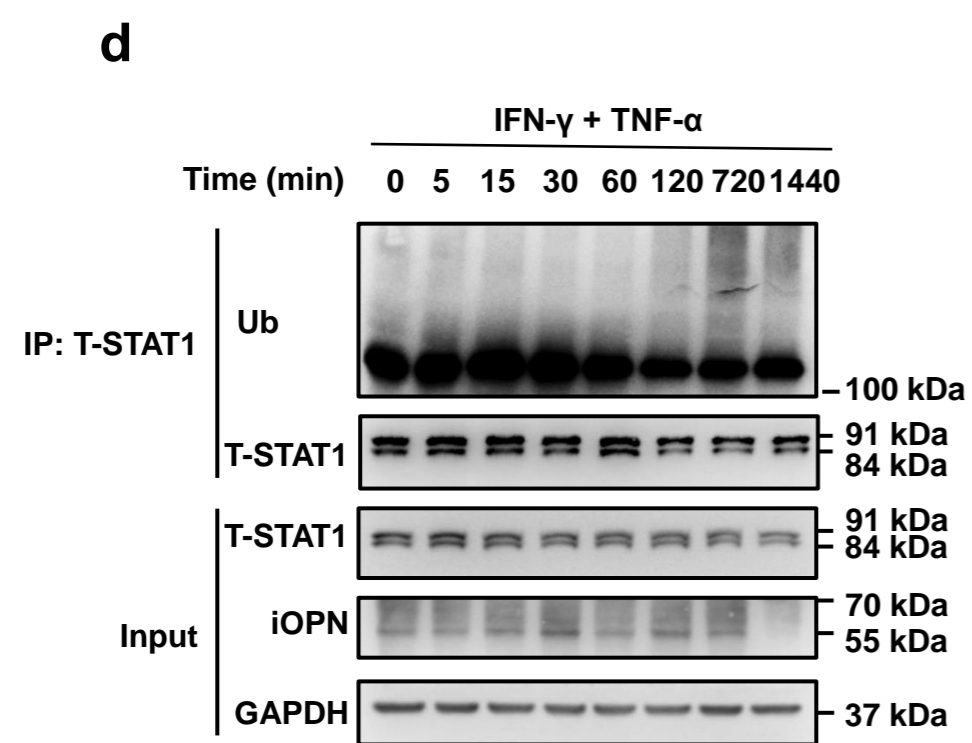

**IP:T-STAT1-  
Ub**

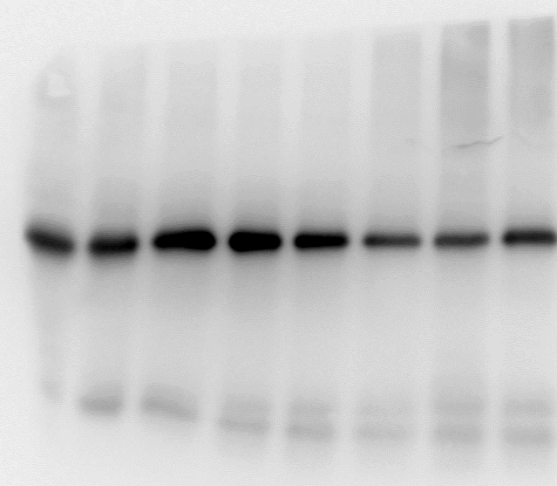

**IP:T-STAT1-  
T-STAT1**

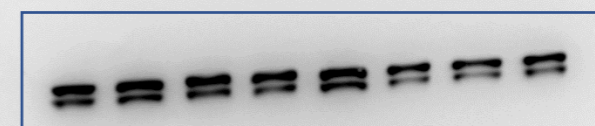

**T-STAT1**

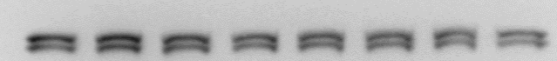

**iOPN**

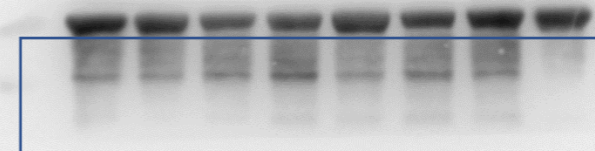

**GAPDH**

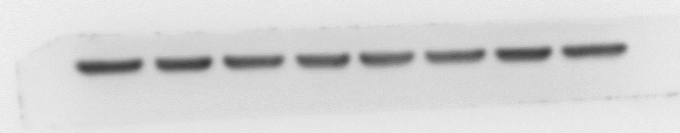



**Figure 6**

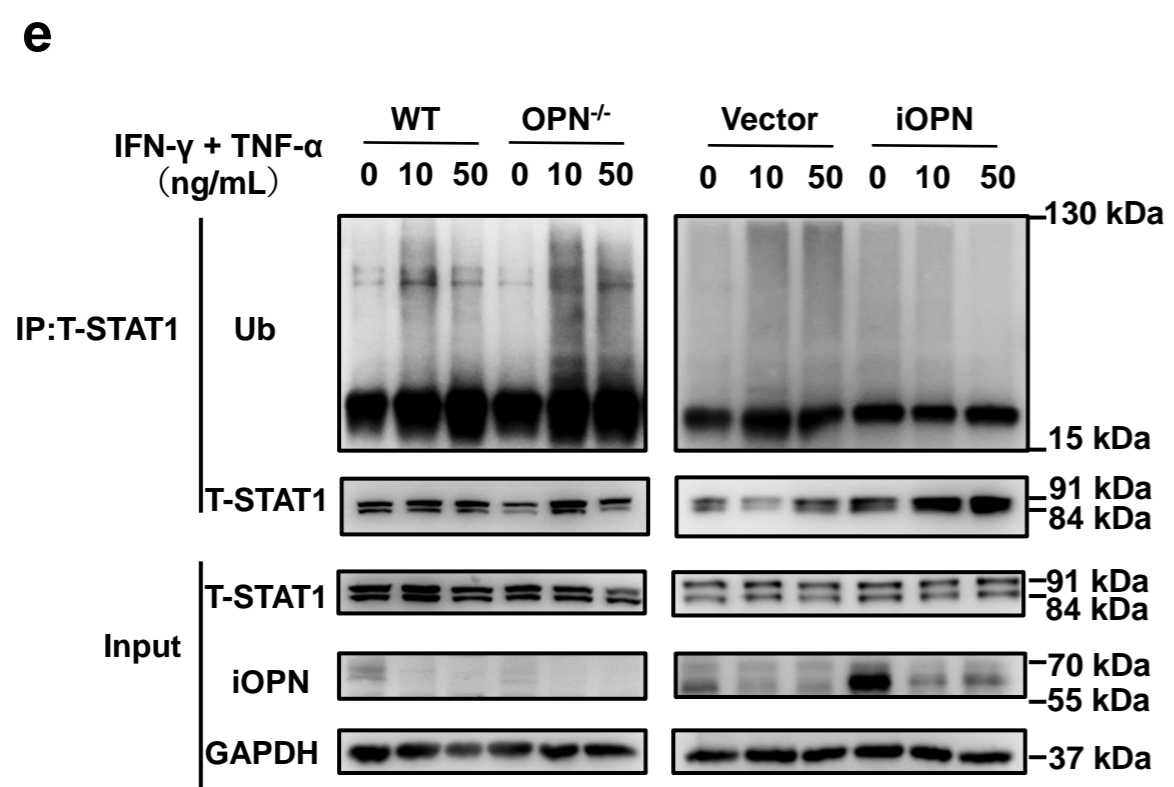

**IP:T-STAT1-Ub**

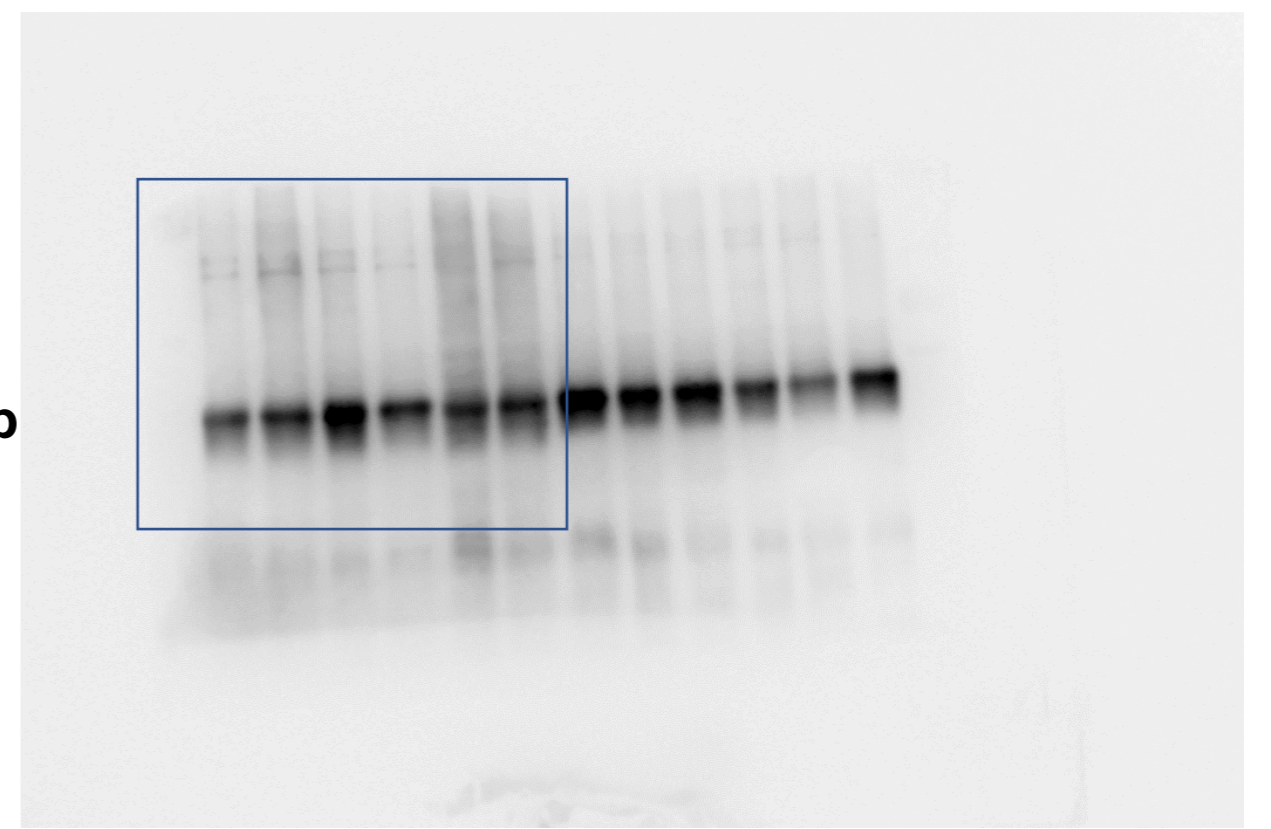

**IP:T-STAT1-T-STAT1**

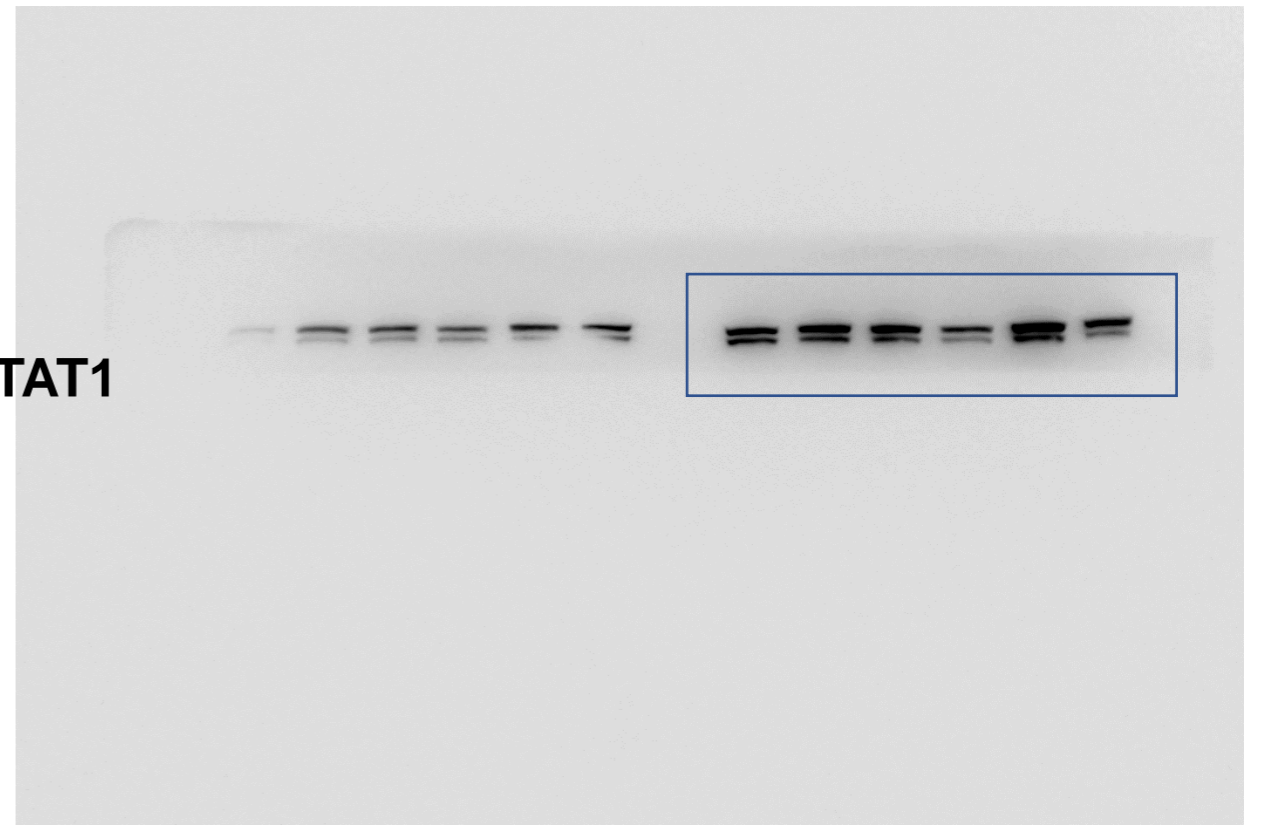

**T-STAT1**

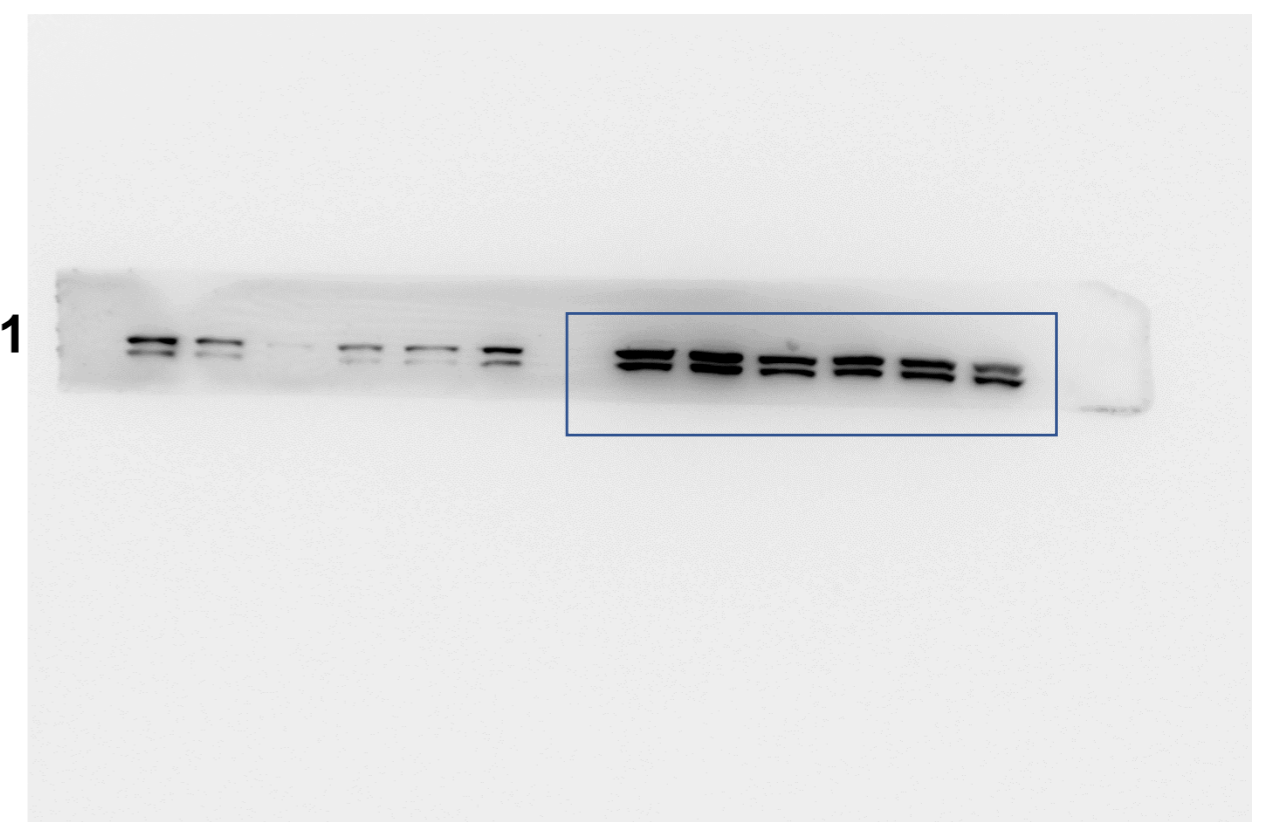

**iOPN**

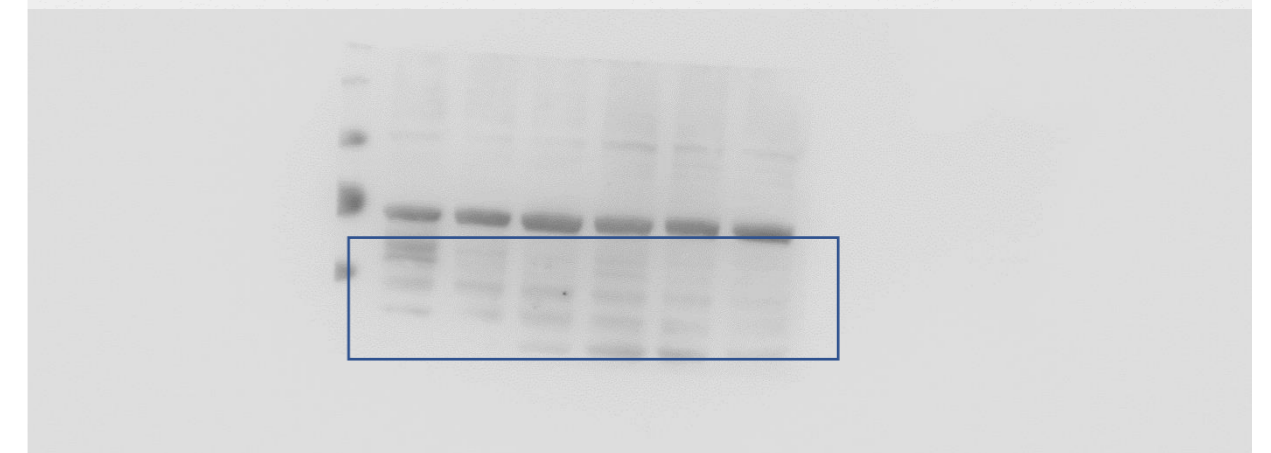

**GAPDH**

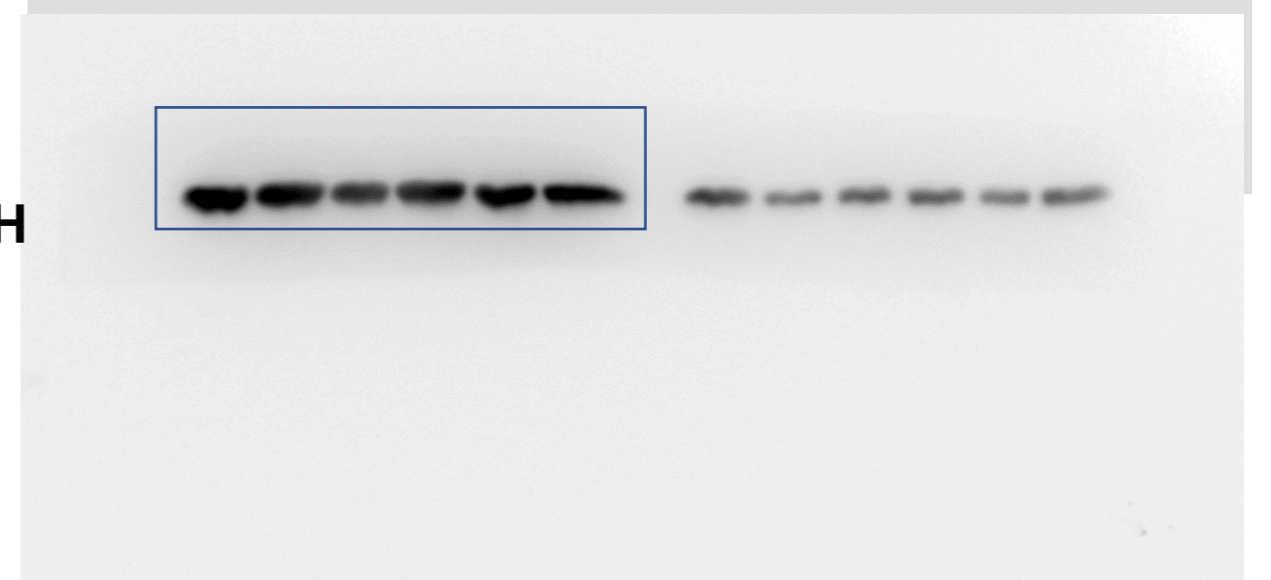



**Figure 6**

**e**

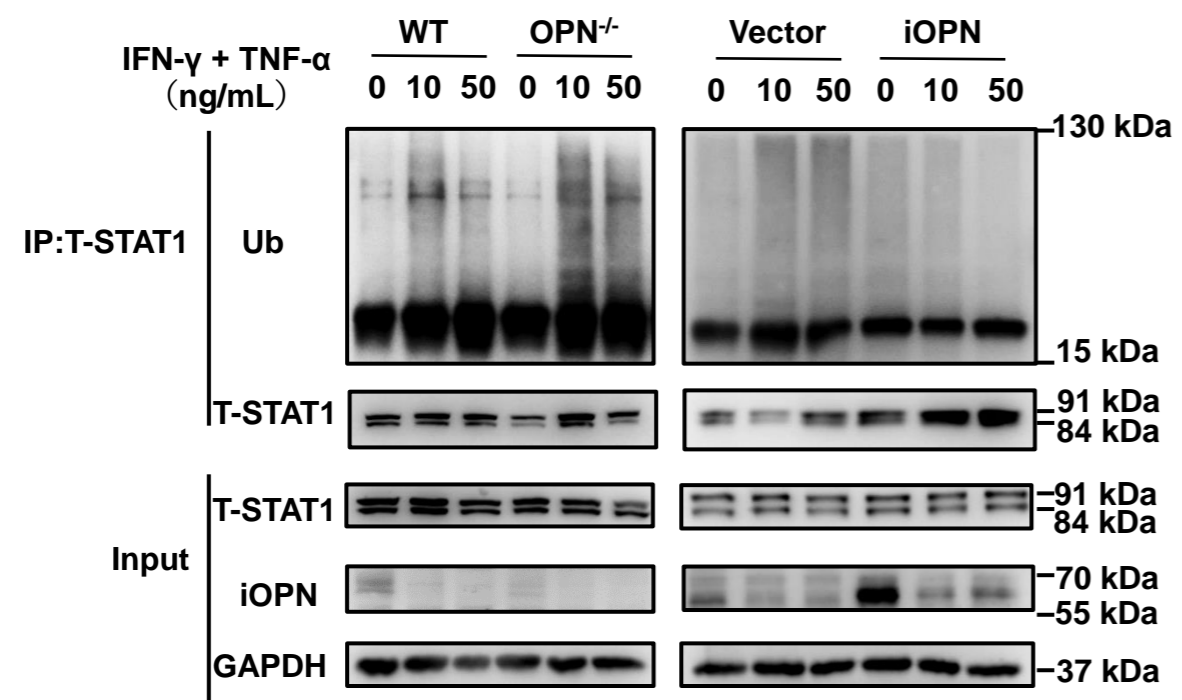

**IP: T-STAT1-Ub**

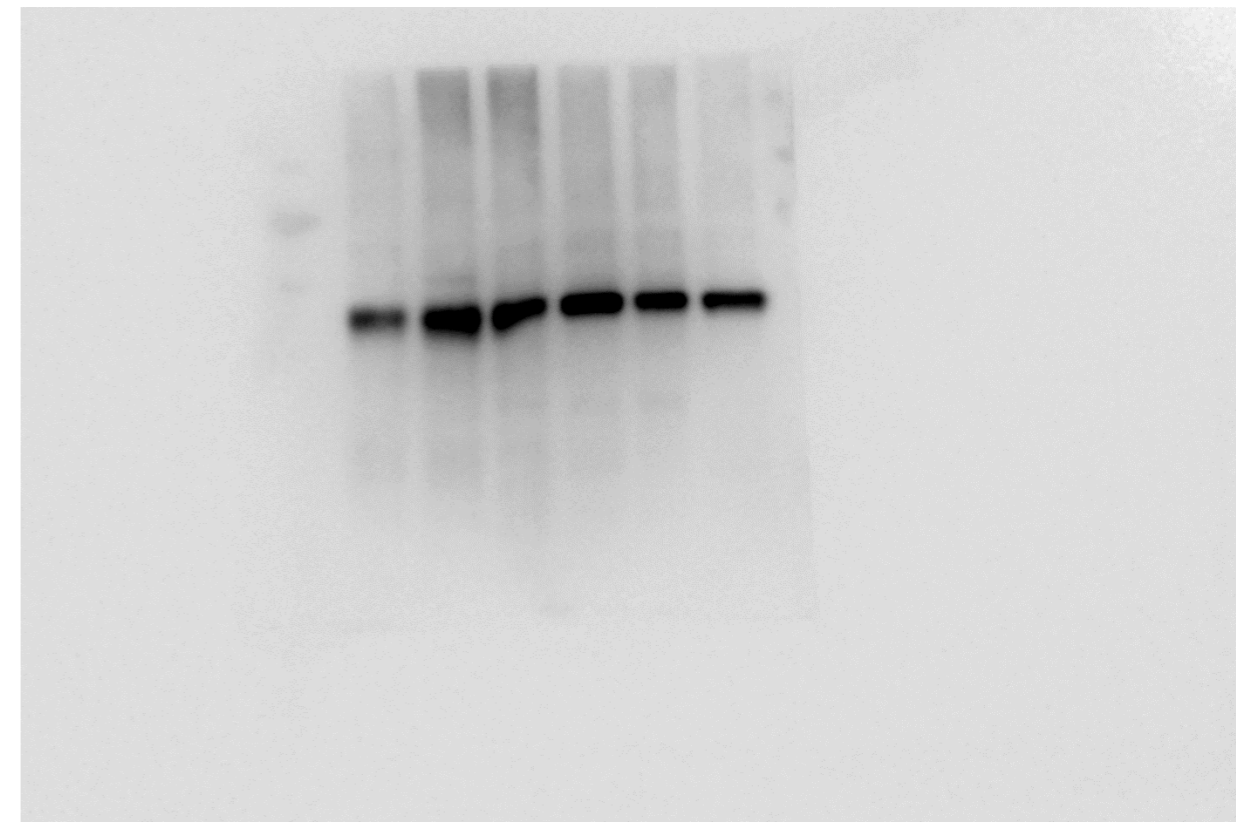

**IP: T-STAT1-T-STAT1**

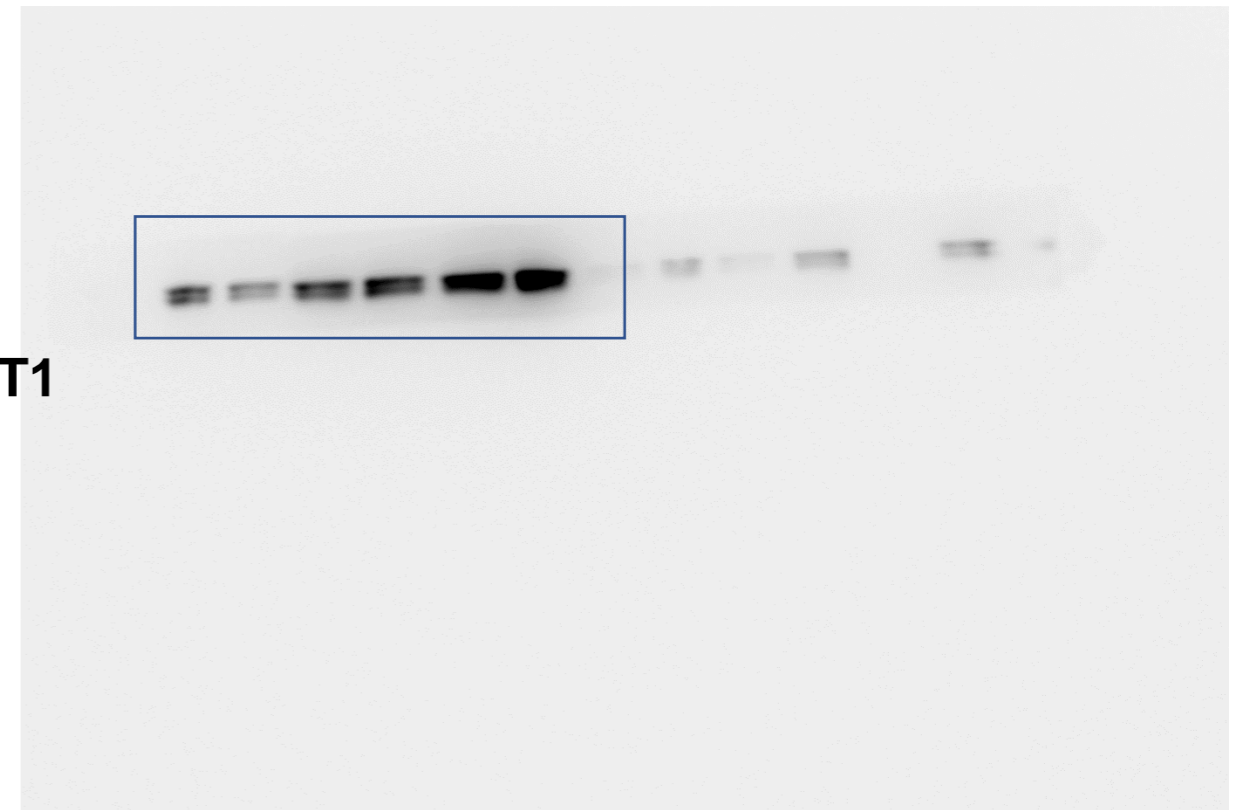

**T-STAT1**

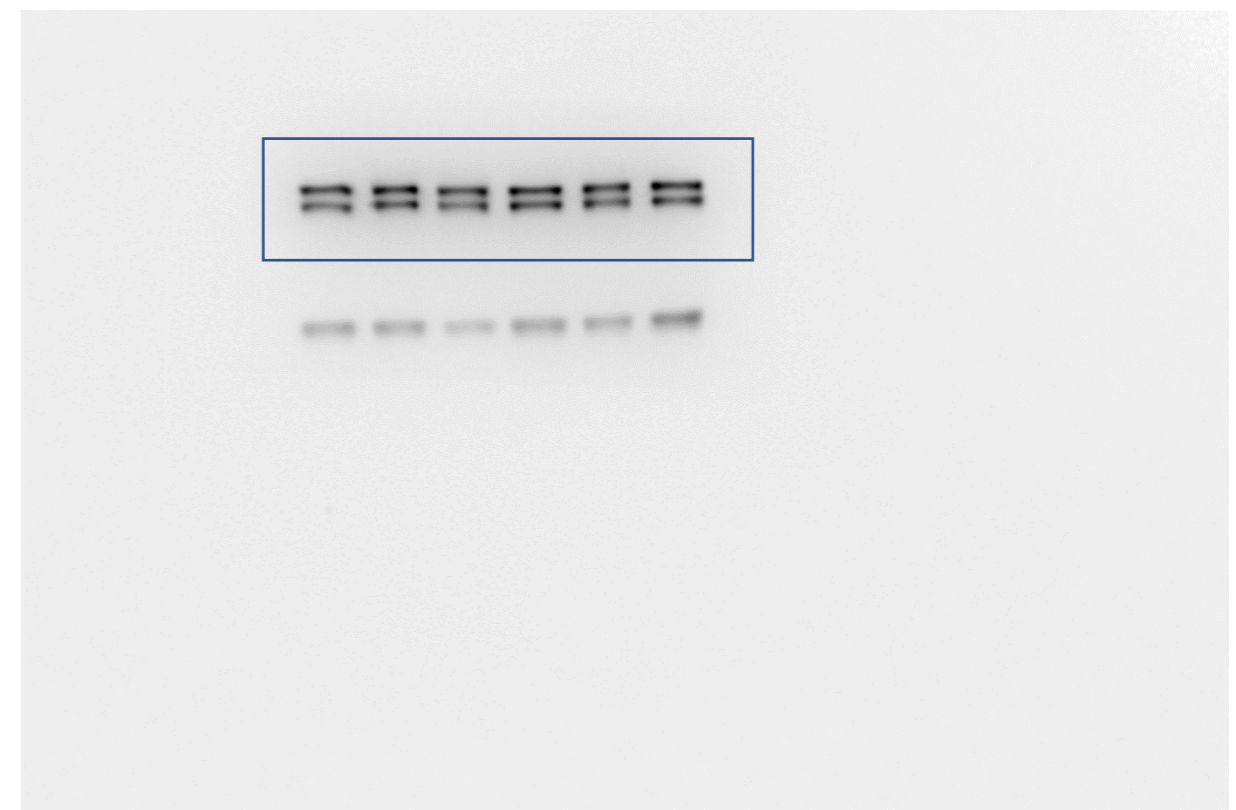

**iOPN**

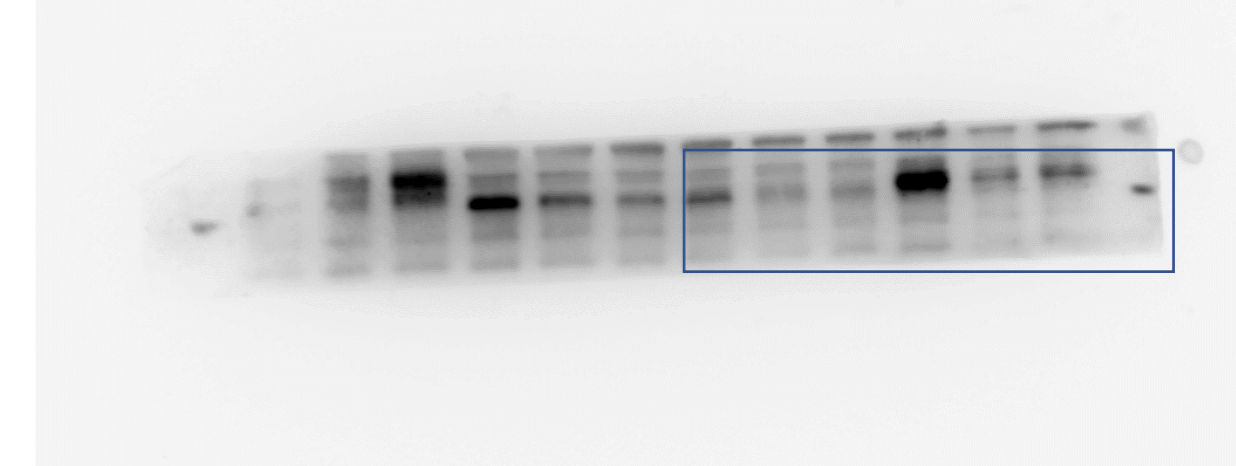

**GAPDH**

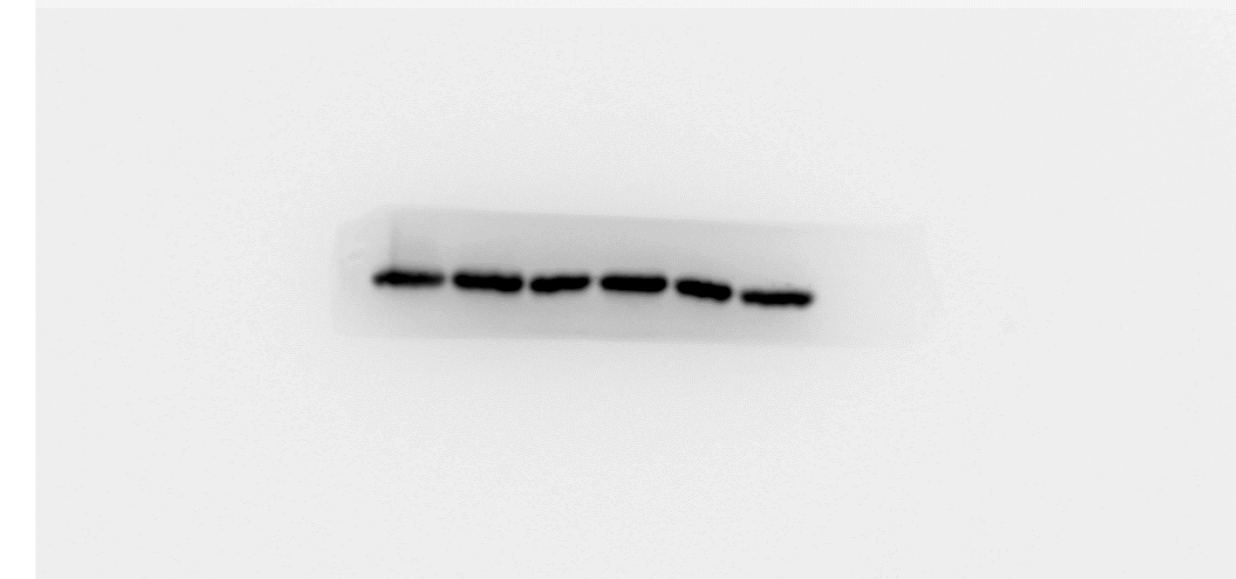

**Right**

**Figure 6**

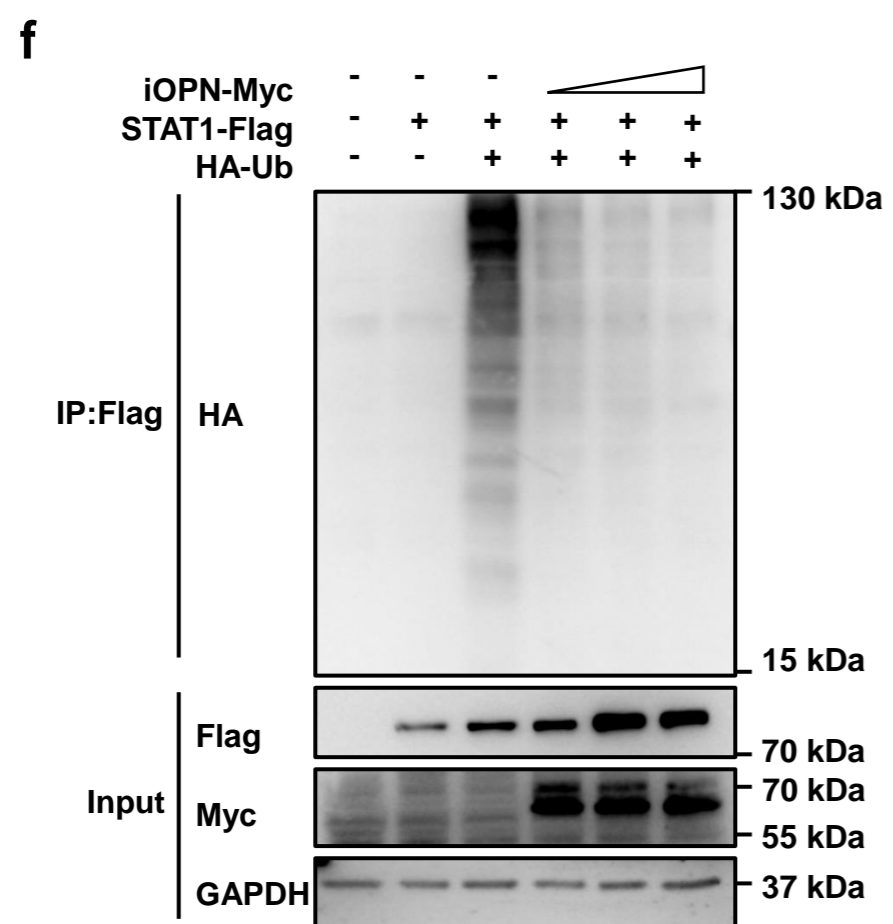

IP:Flag-HA

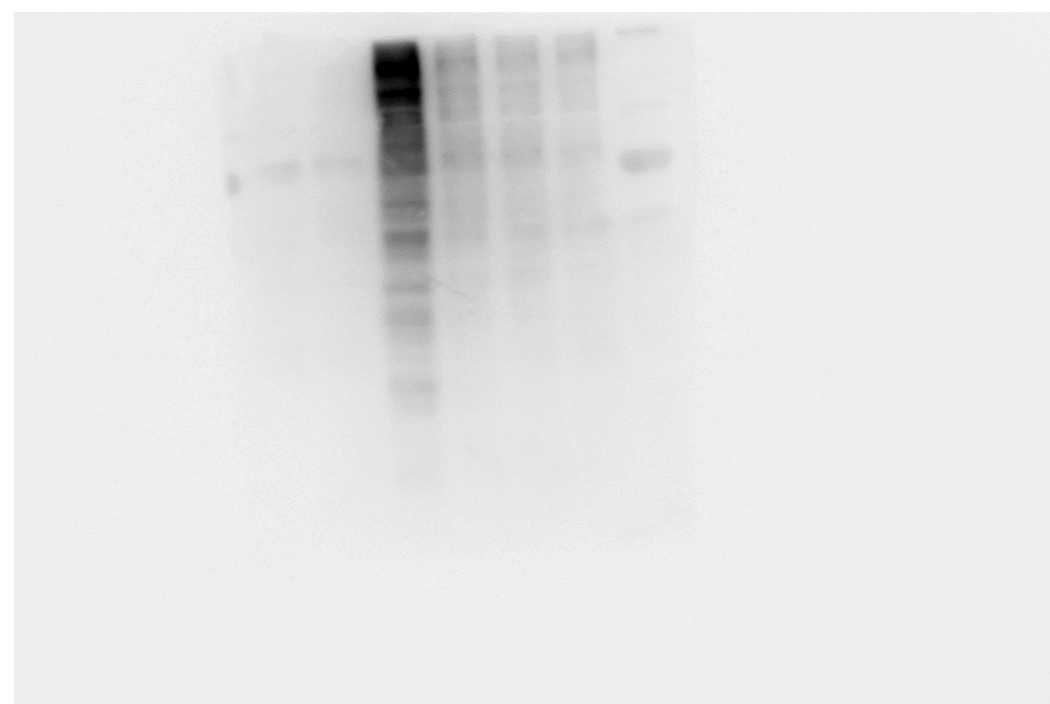

Flag

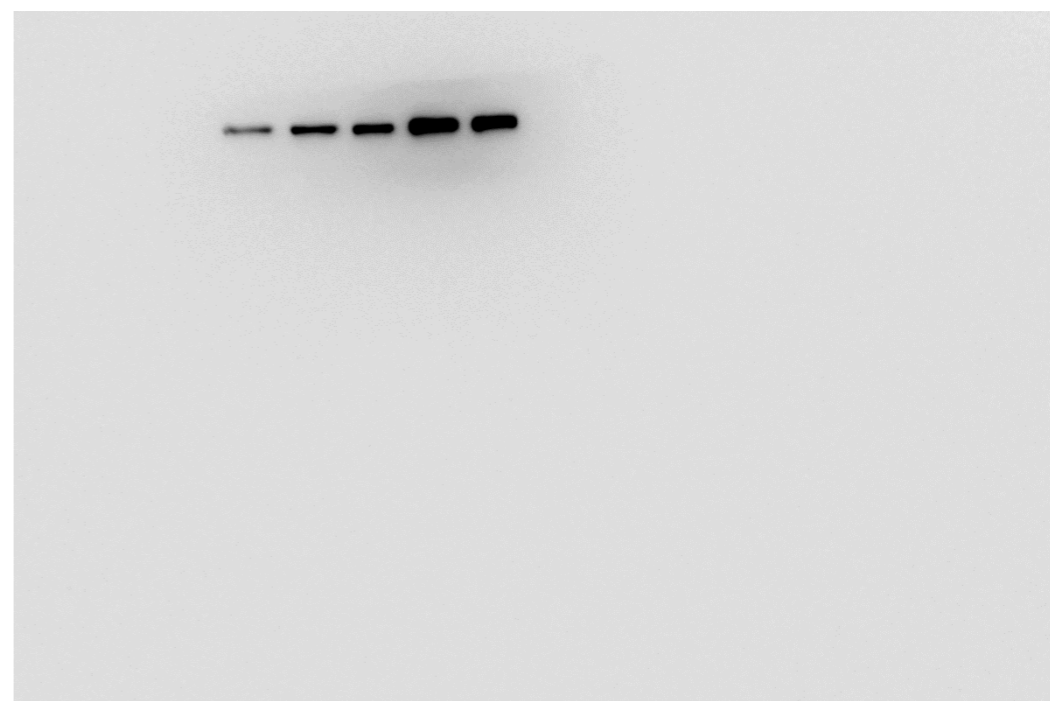

Myc

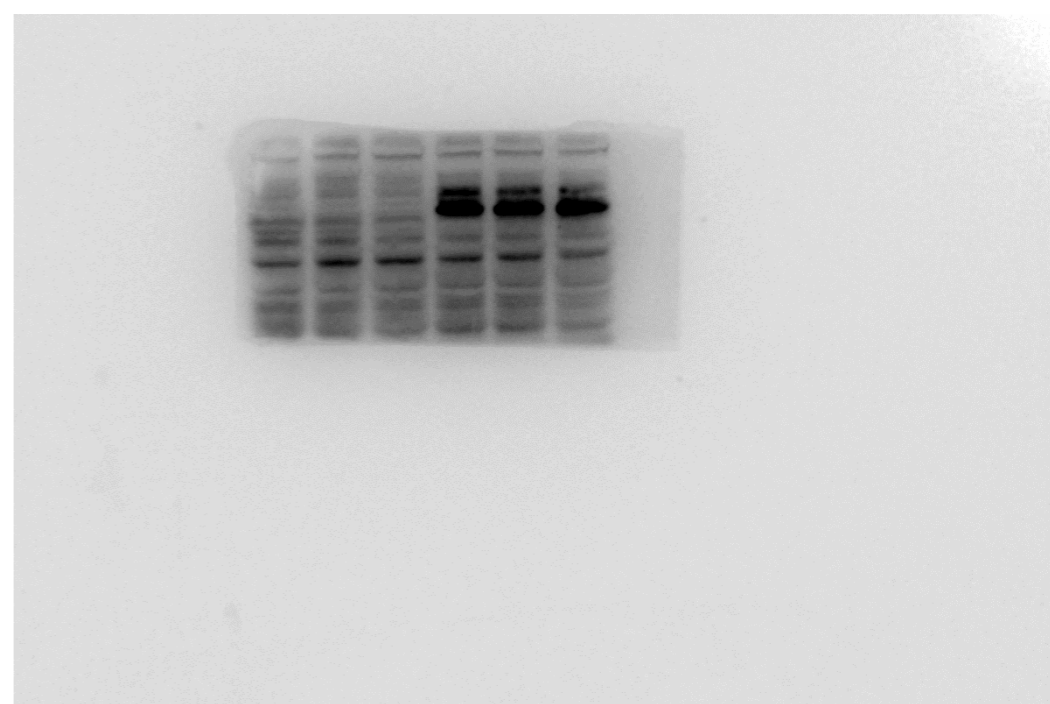

GAPDH

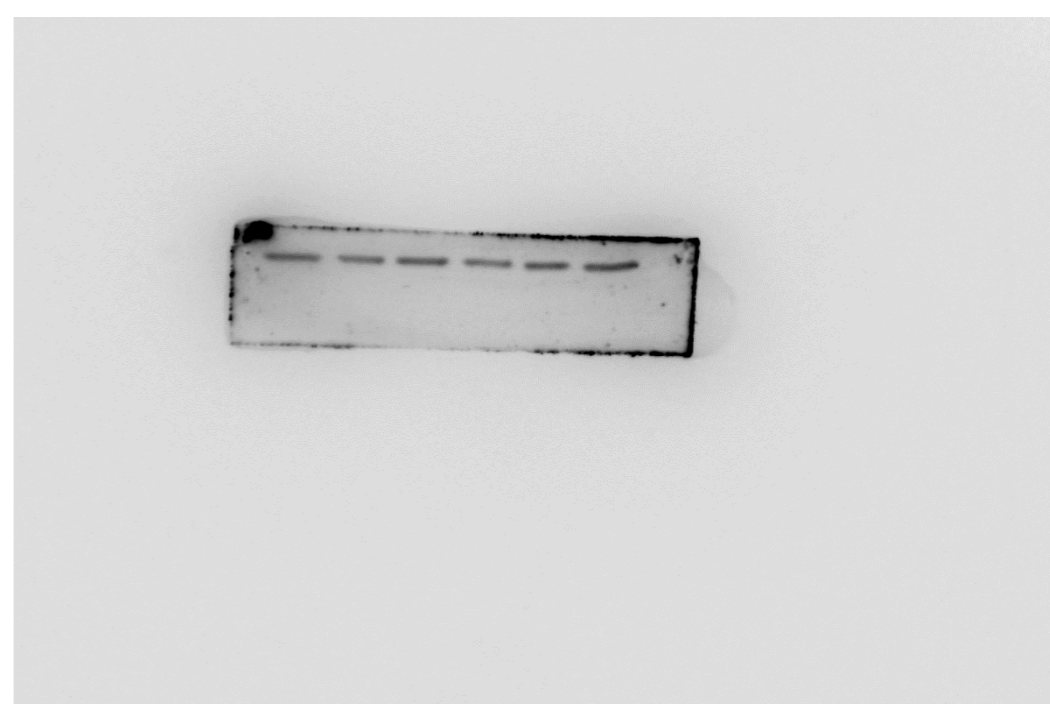



**Figure 7**

**a**

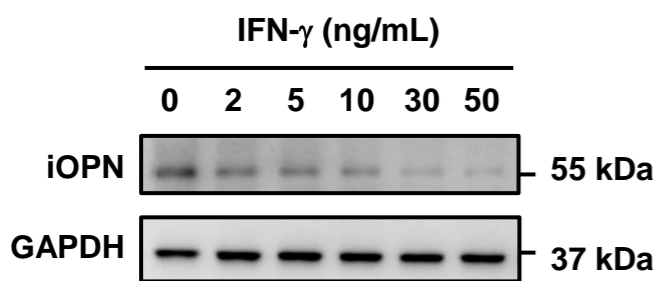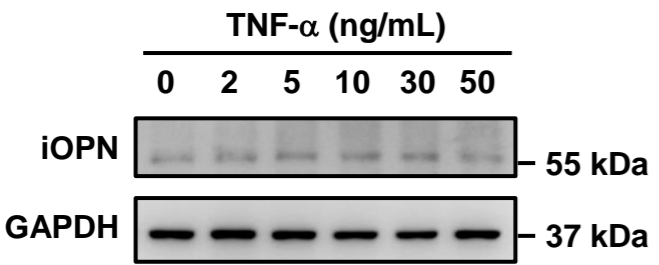

**iOPN**

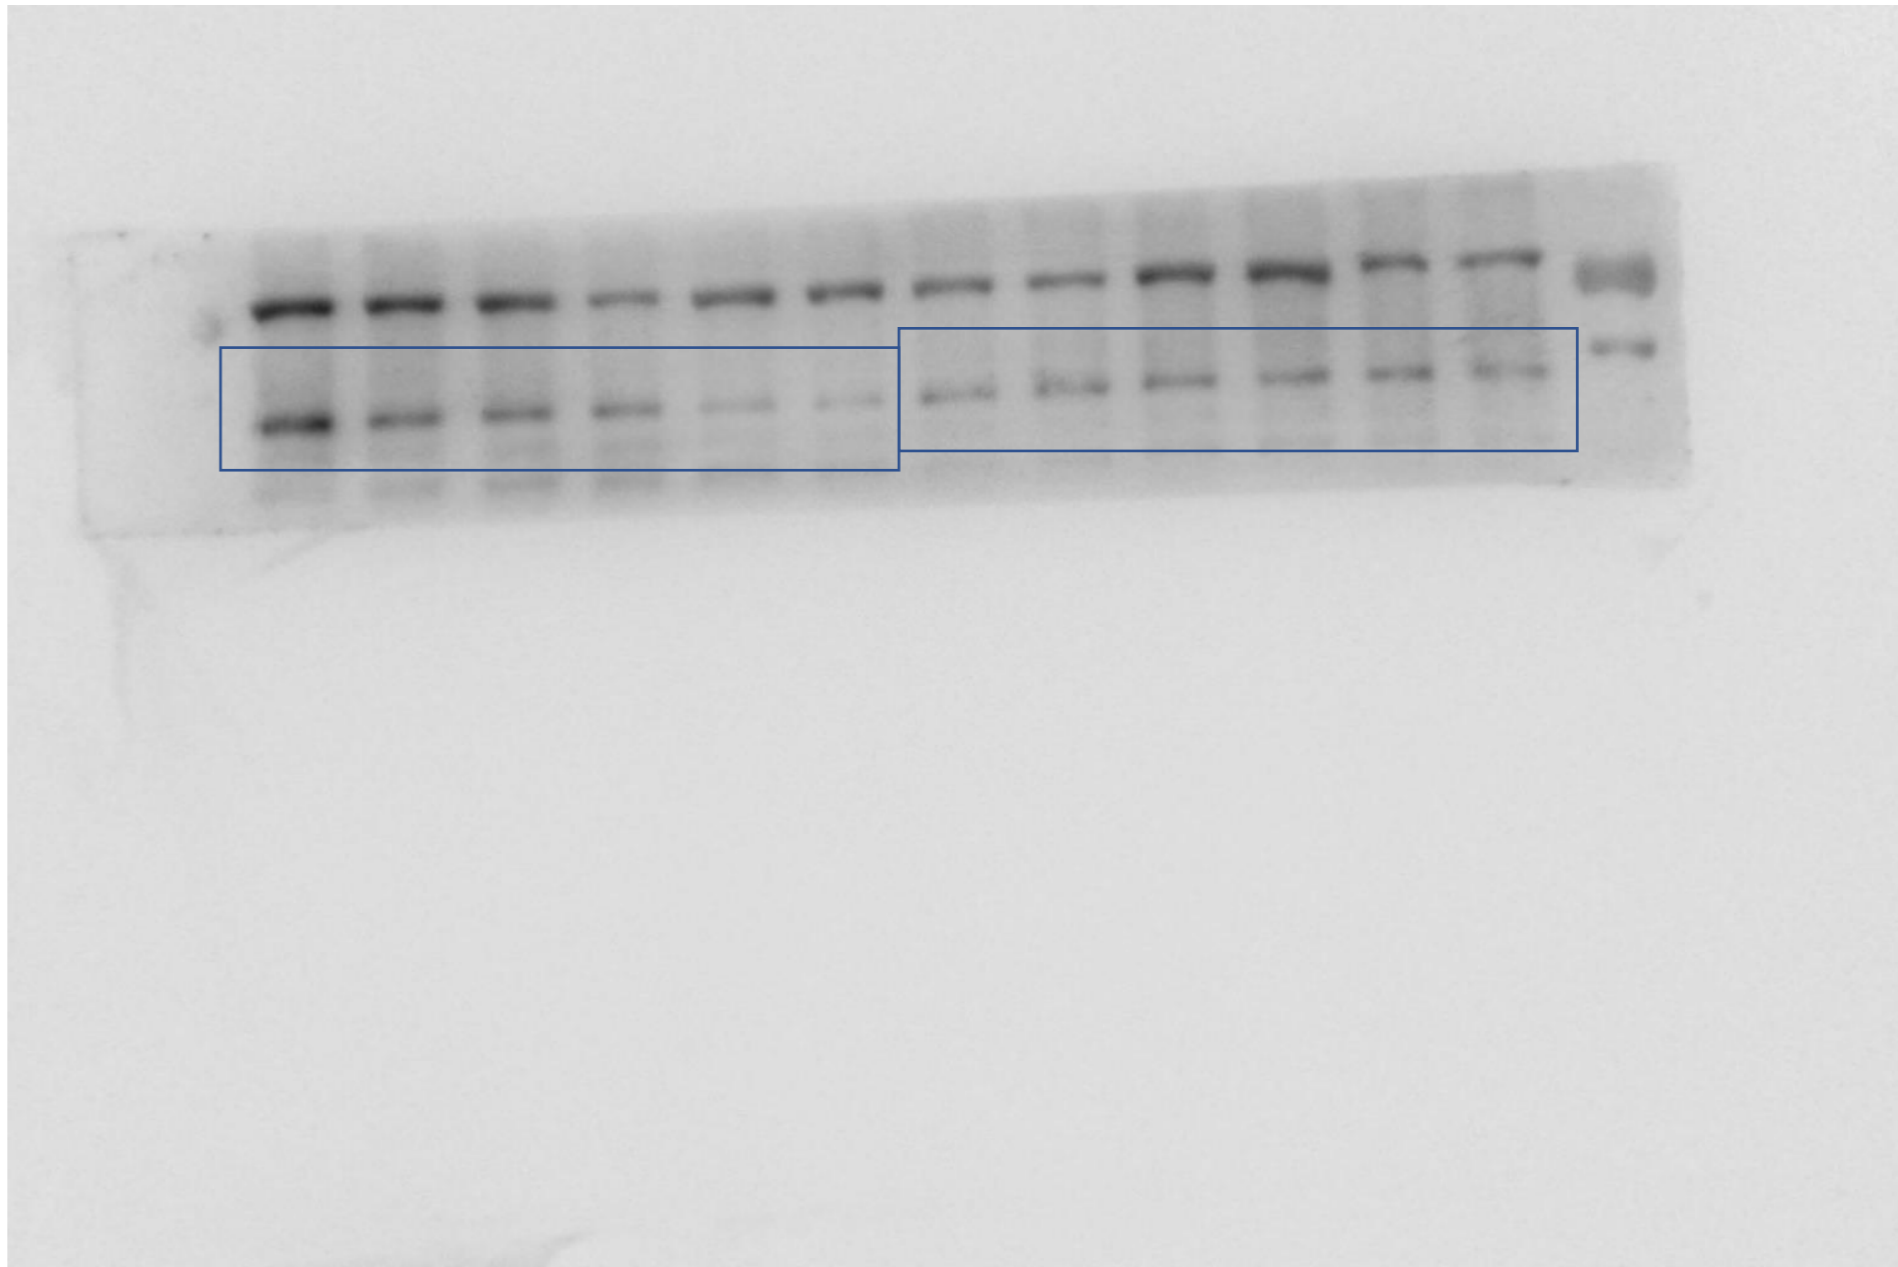

**GAPDH**

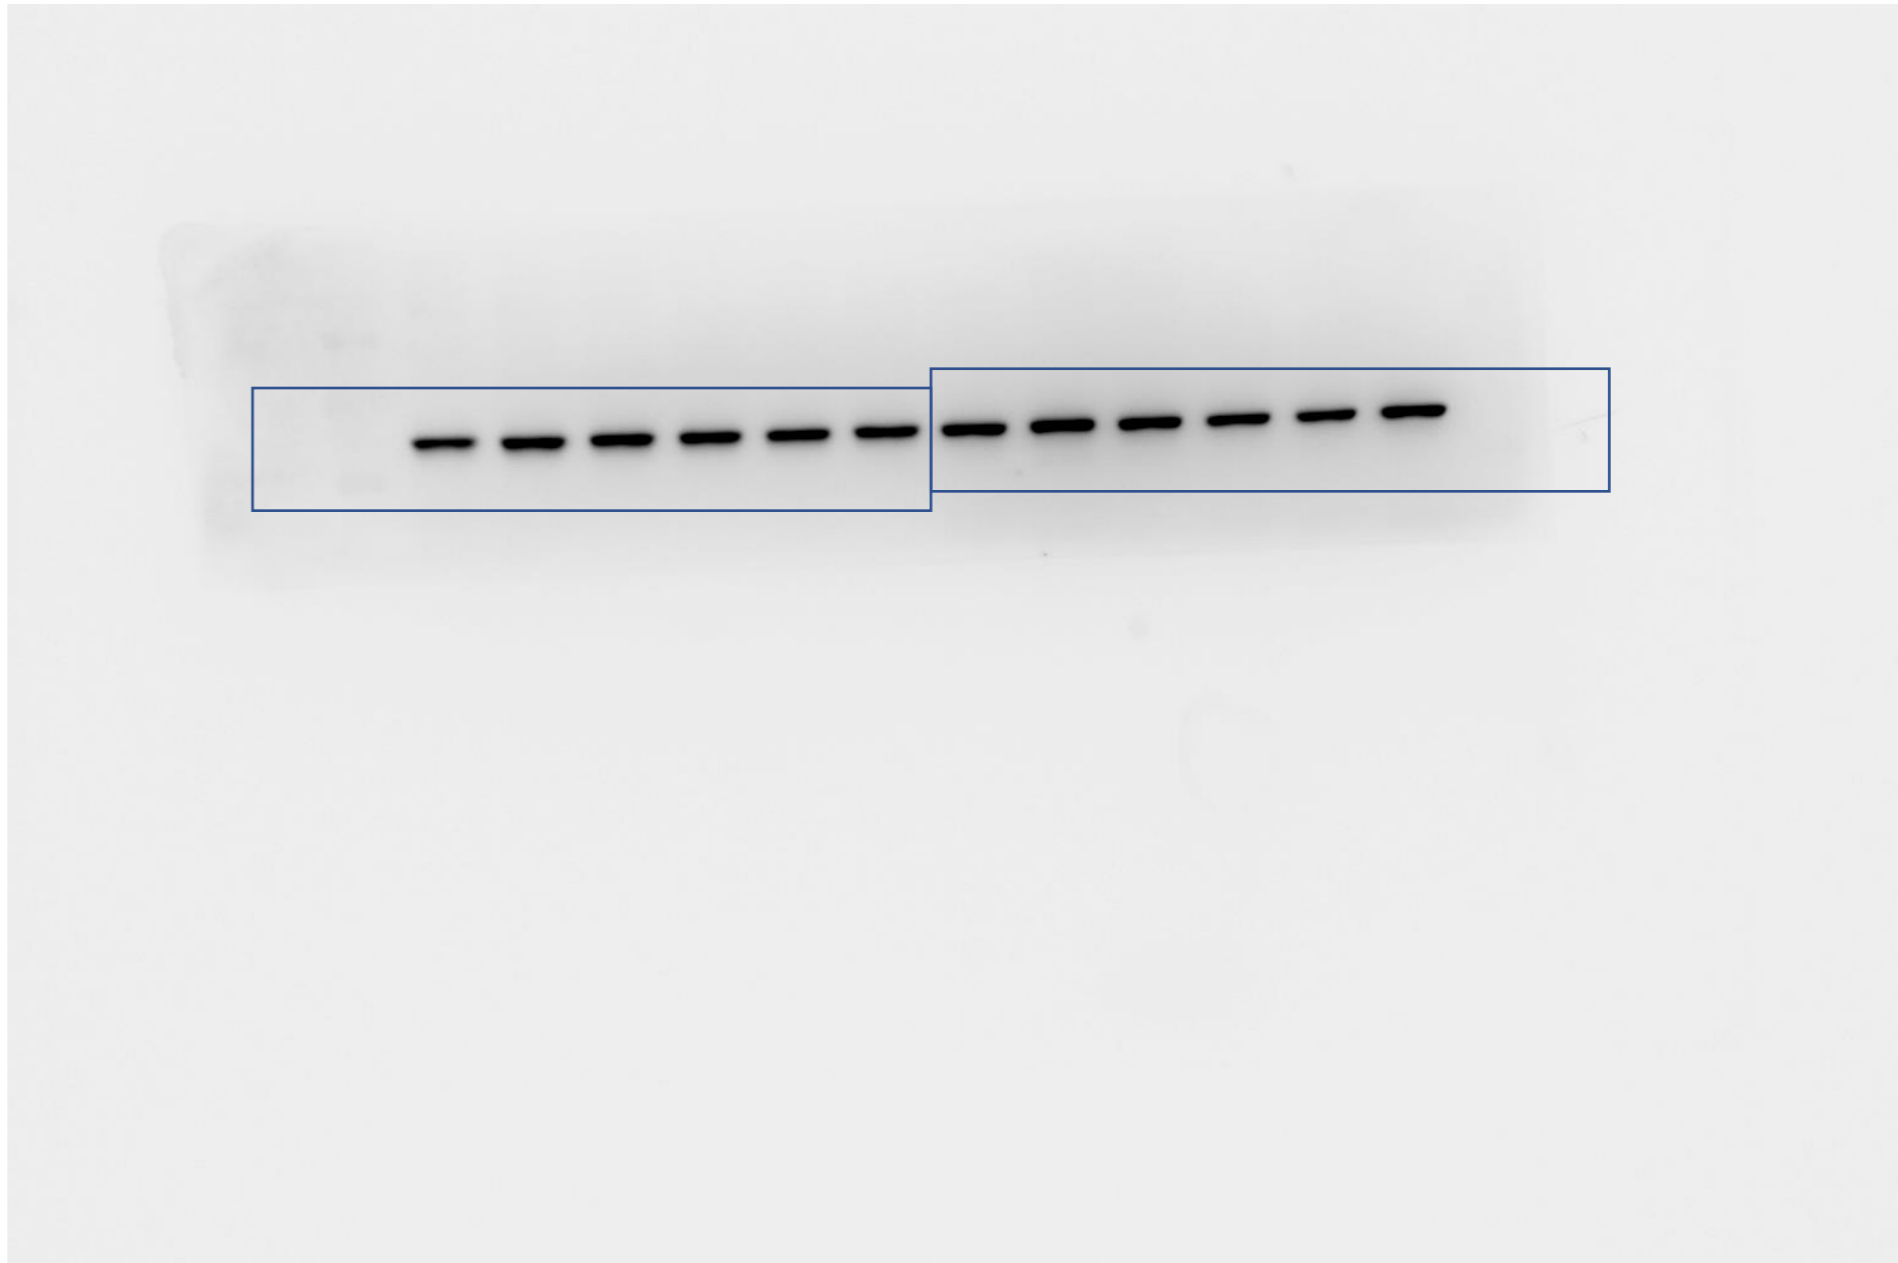

Figure 7

C

|                               |   |   |   |   |   |
|-------------------------------|---|---|---|---|---|
| TNF- $\alpha$ + IFN- $\gamma$ | - | + | + | - | + |
| Anti-IFN- $\gamma$            | - | - | + | - | + |
| Anti-TNF- $\alpha$            | - | - | - | + | + |

iOPN  - 55 kDa  
GAPDH  - 37 kDa

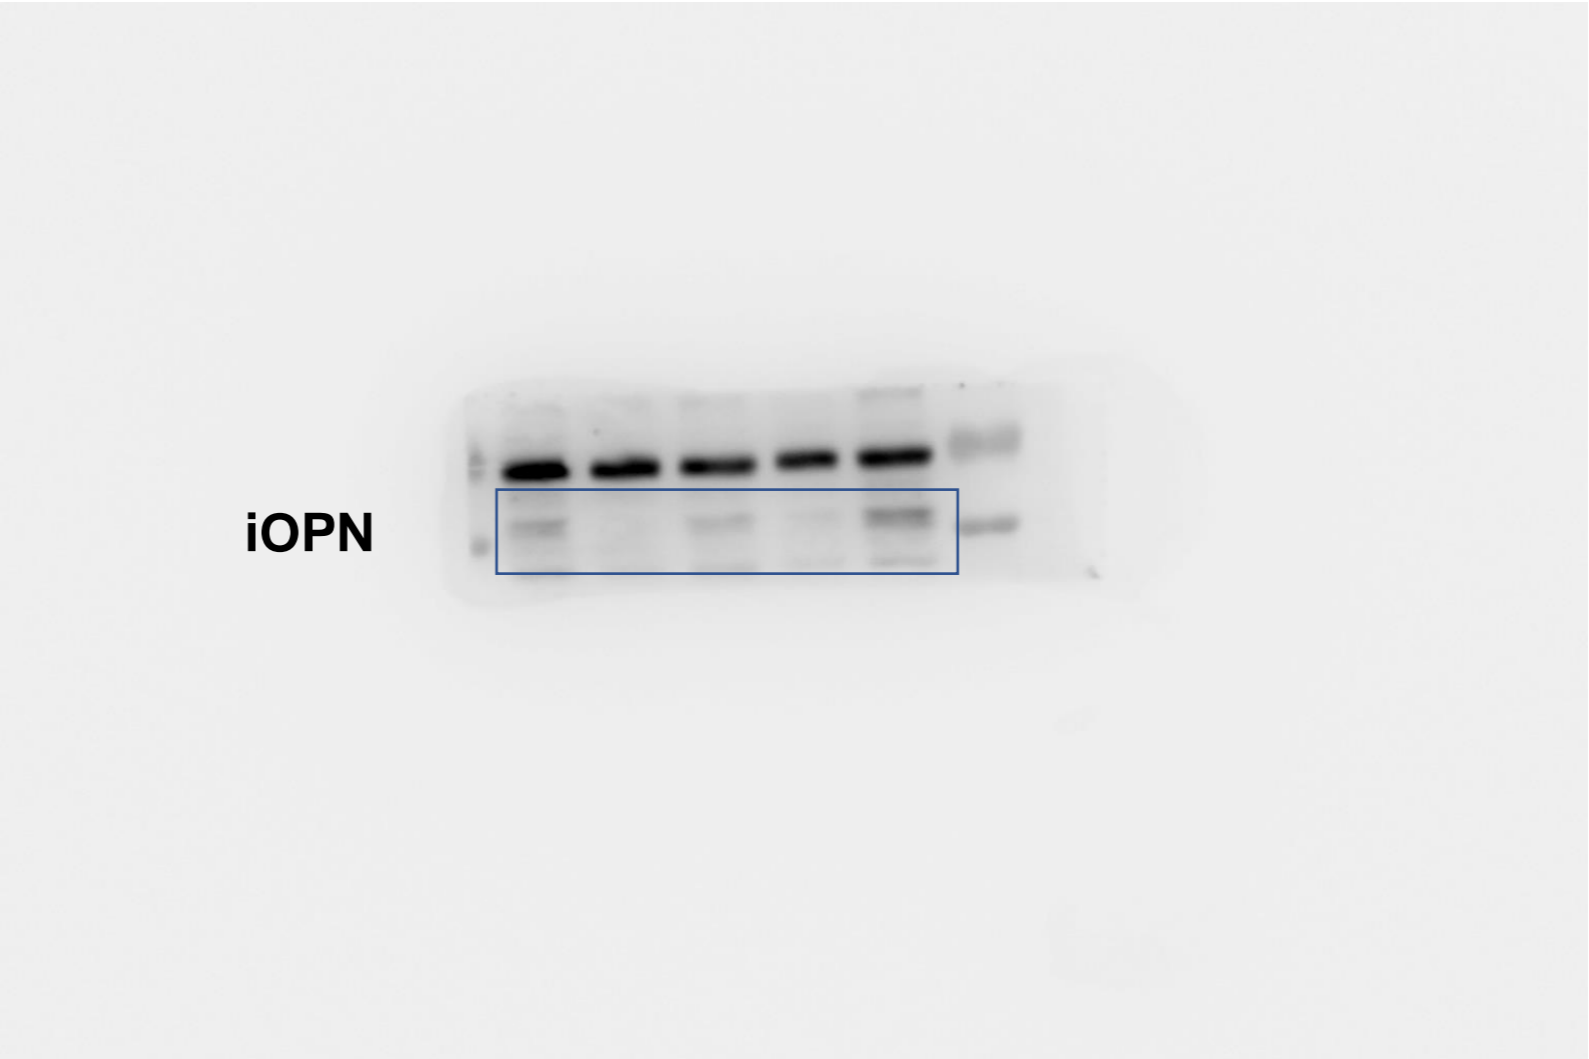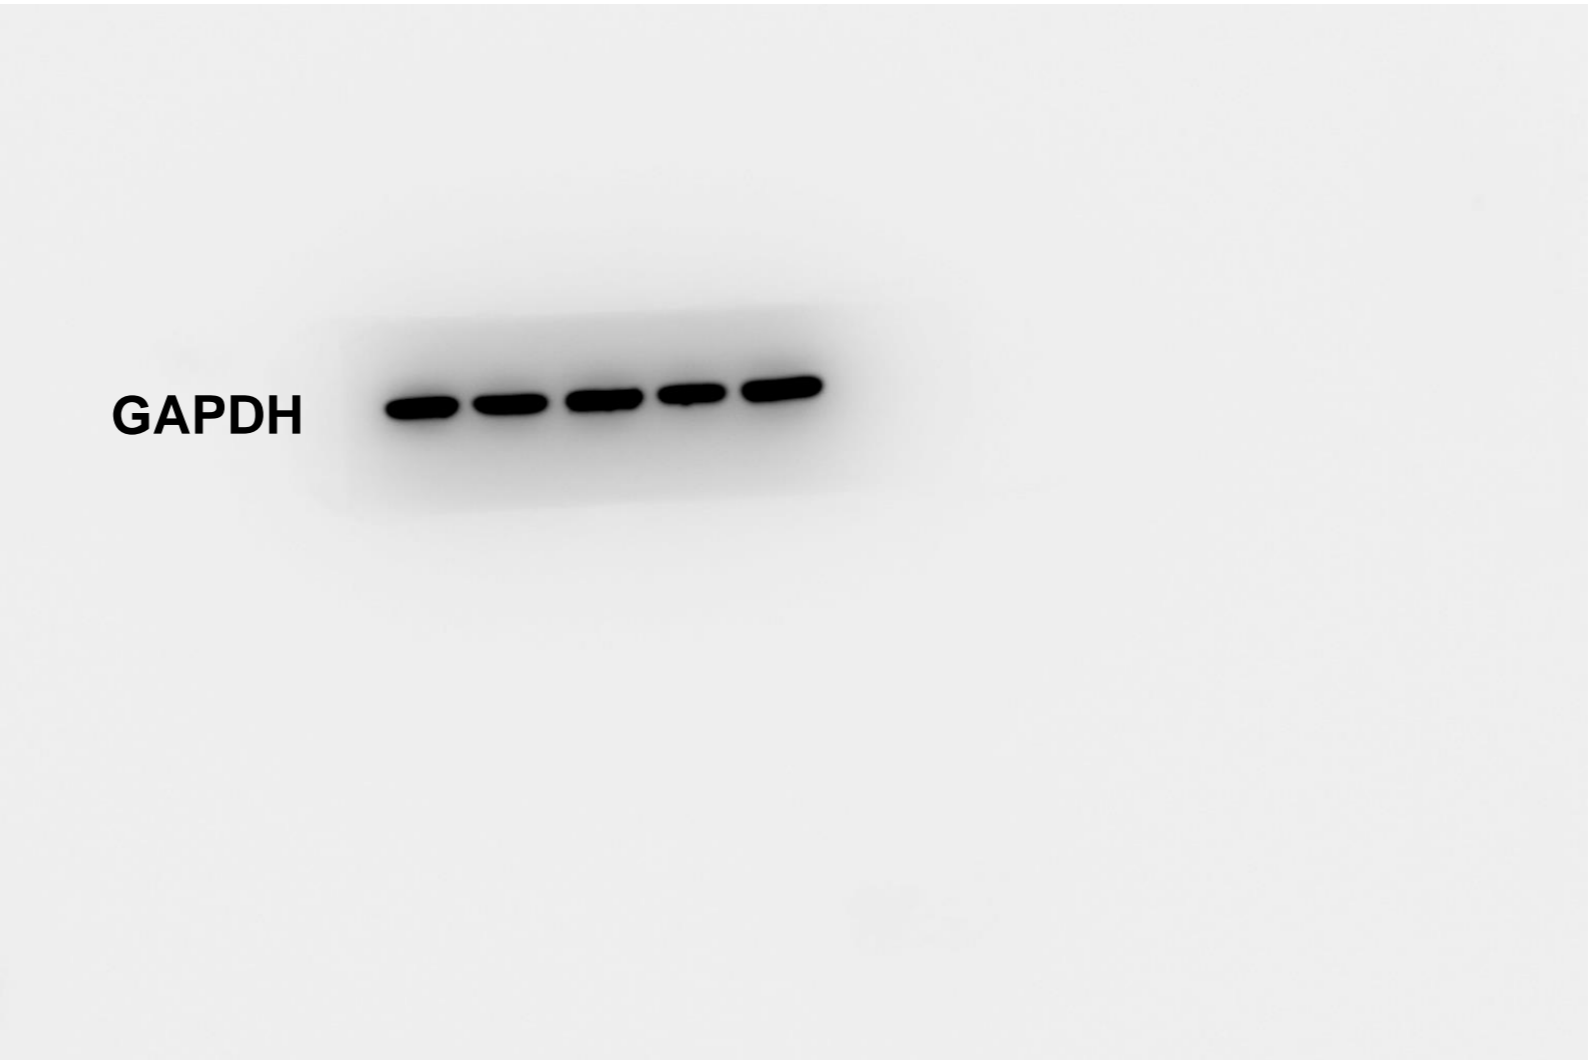

**Figure 7**

**d**

|                               |   |   |   |   |
|-------------------------------|---|---|---|---|
| TNF- $\alpha$ + IFN- $\gamma$ | - | - | + | + |
| Flu                           | - | - | - | + |
| P-STAT1 (Tyr701)              |   |   |   |   |
| iOPN                          |   |   |   |   |
| GAPDH                         |   |   |   |   |

= 91 kDa  
= 84 kDa  
= 55 kDa  
= 37 kDa

**P-STAT1(Tyr701)**

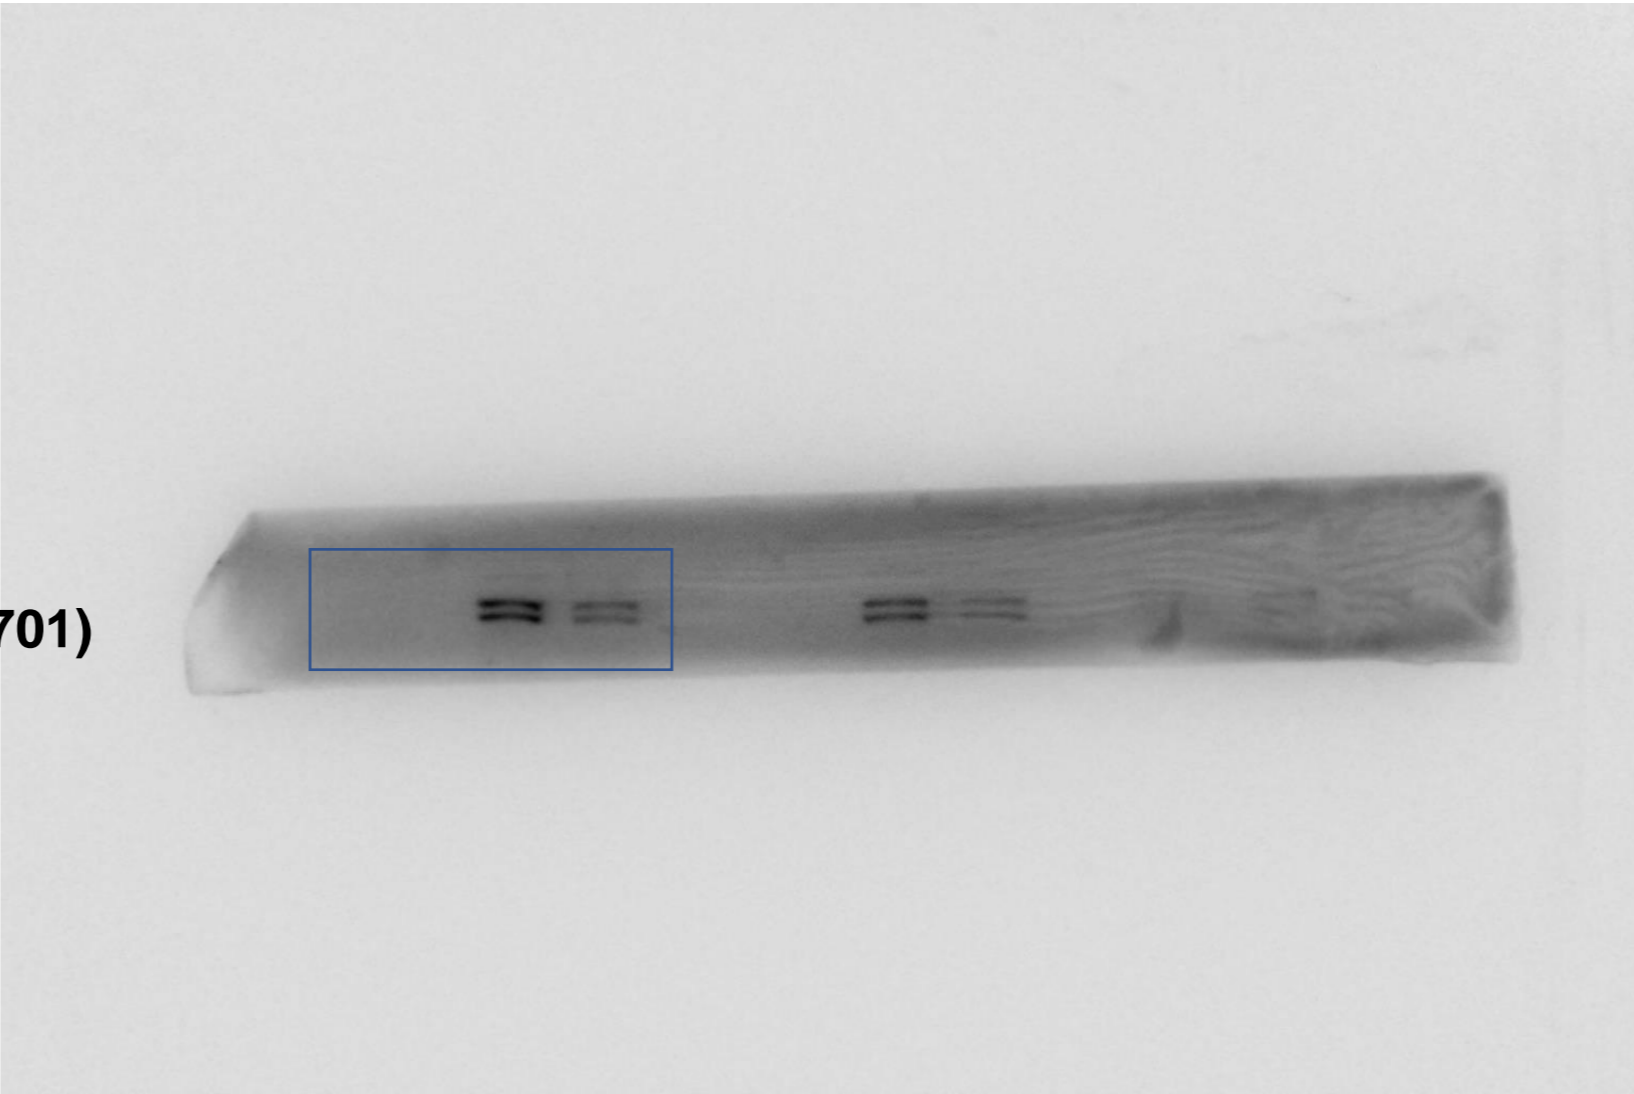

**iOPN**

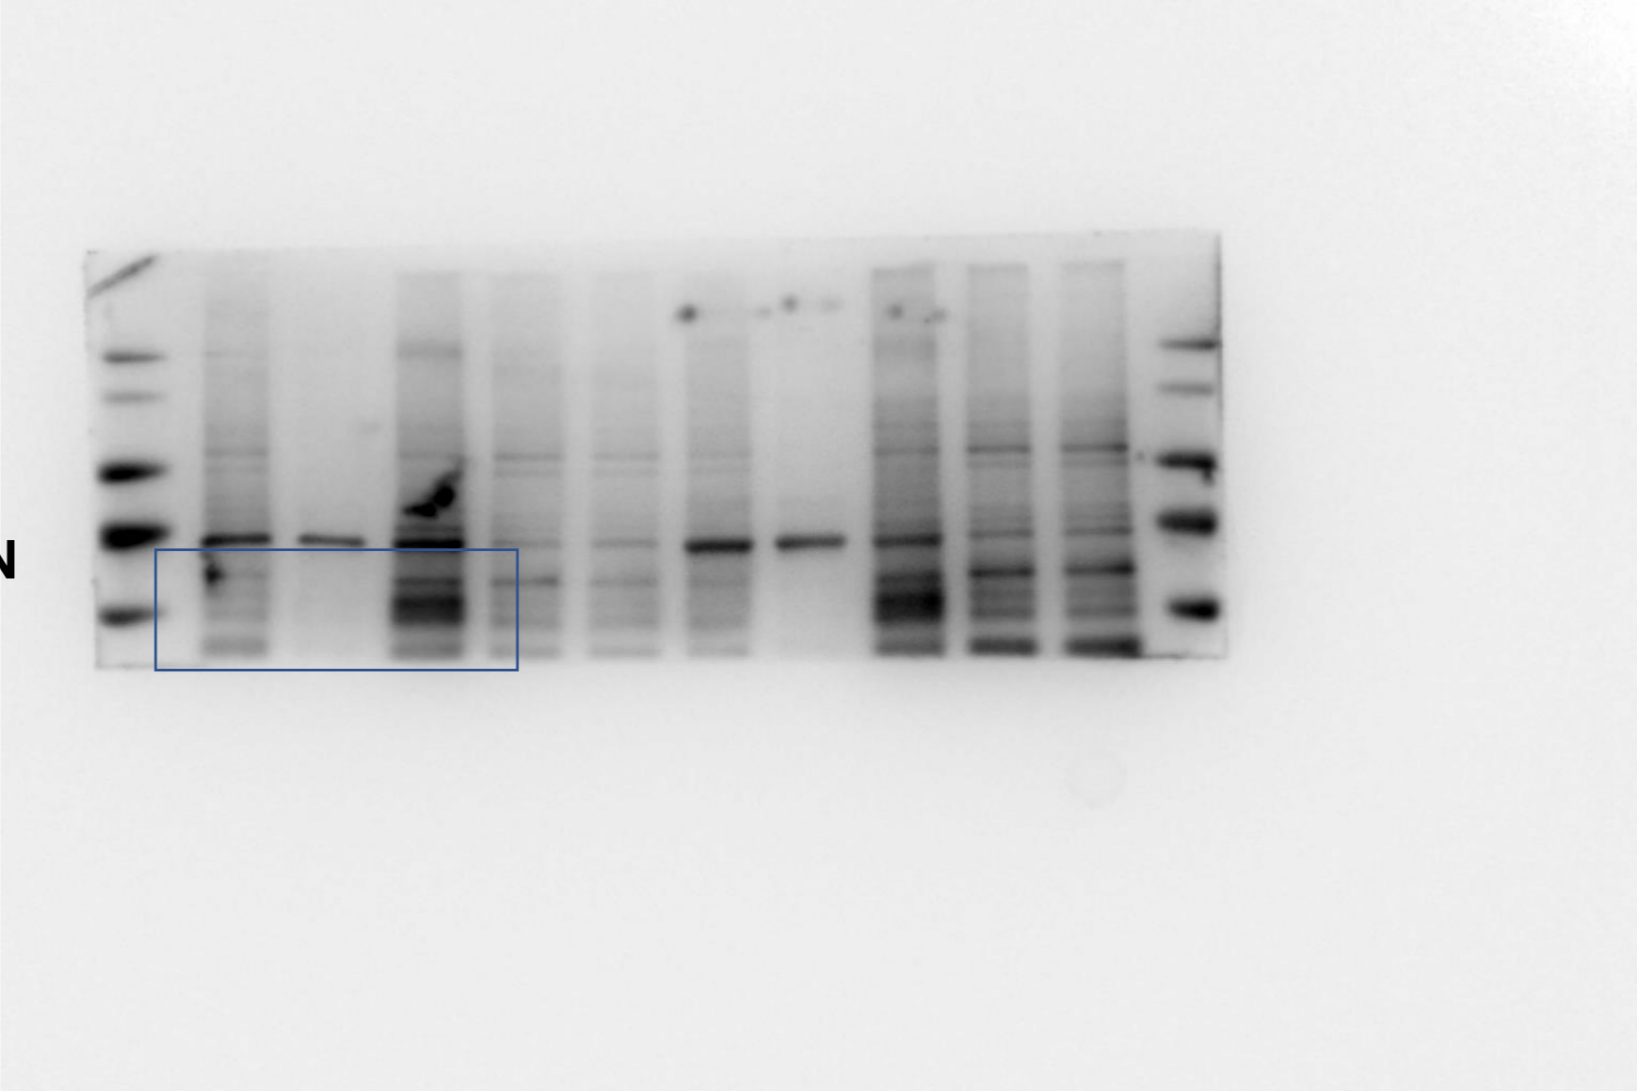

**GAPDH**

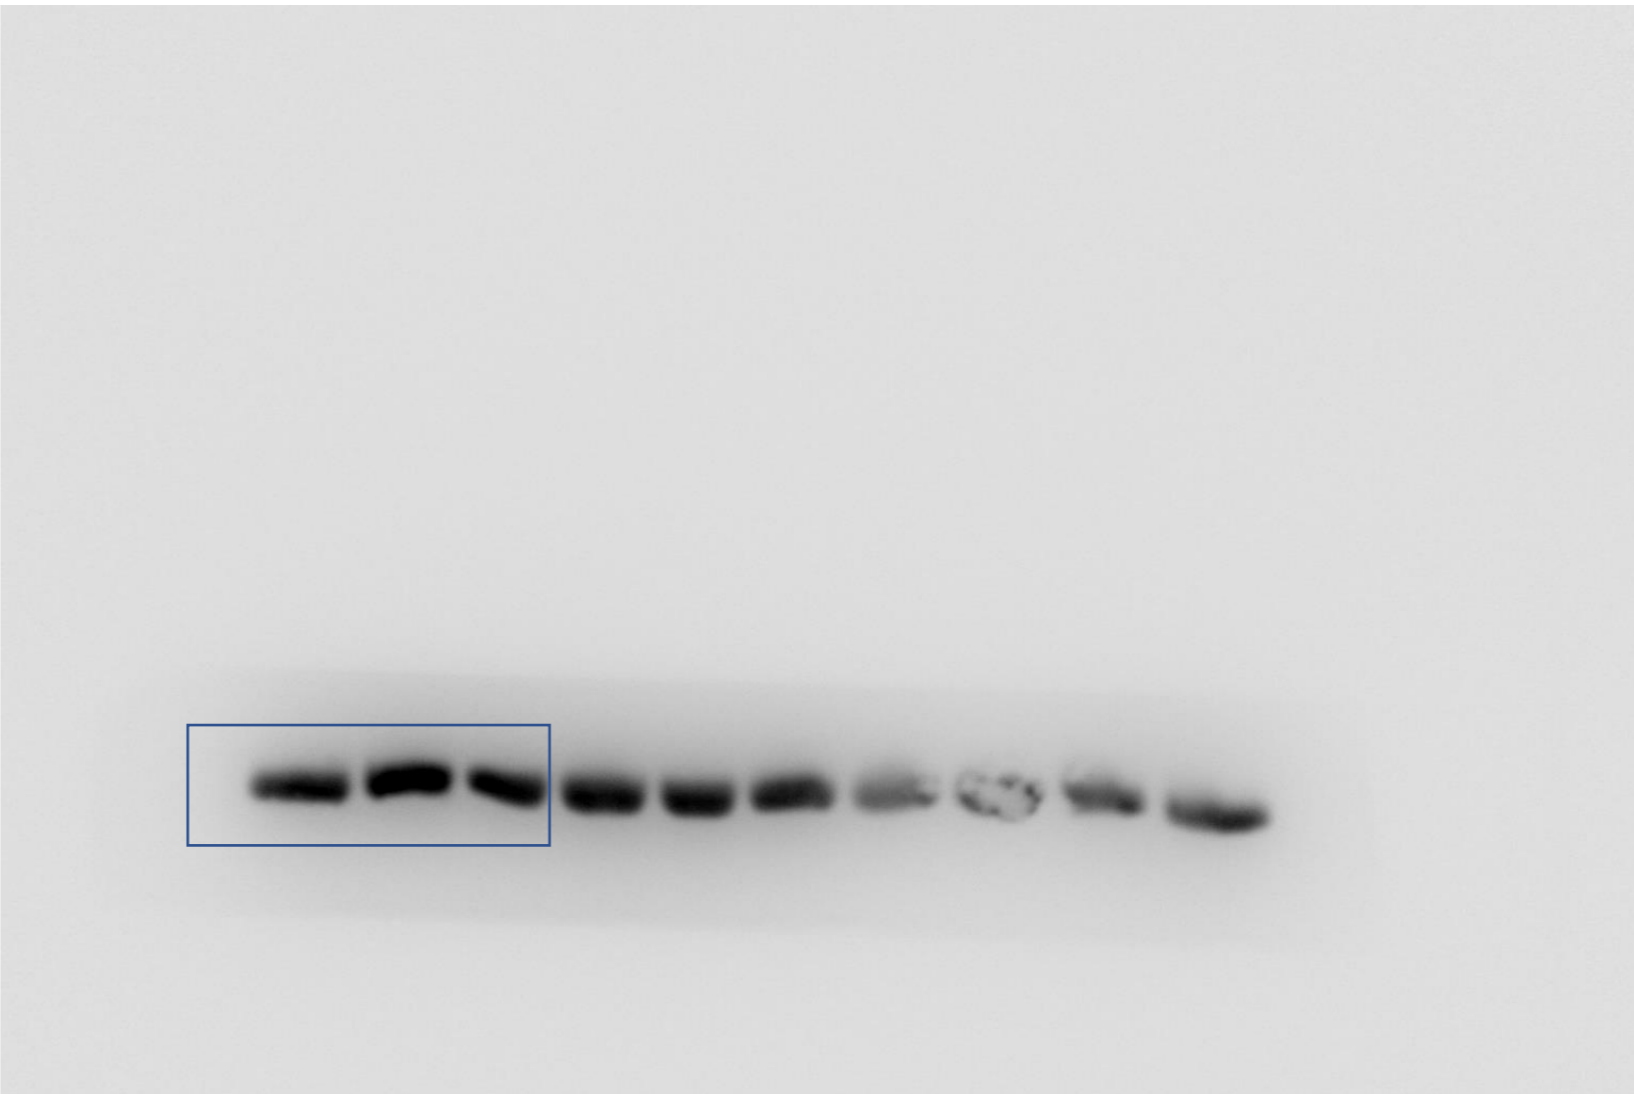

# Figure S2

a

WT OPN<sup>-/-</sup>  
iOPN 55 kDa  
GAPDH 37 kDa

iOPN

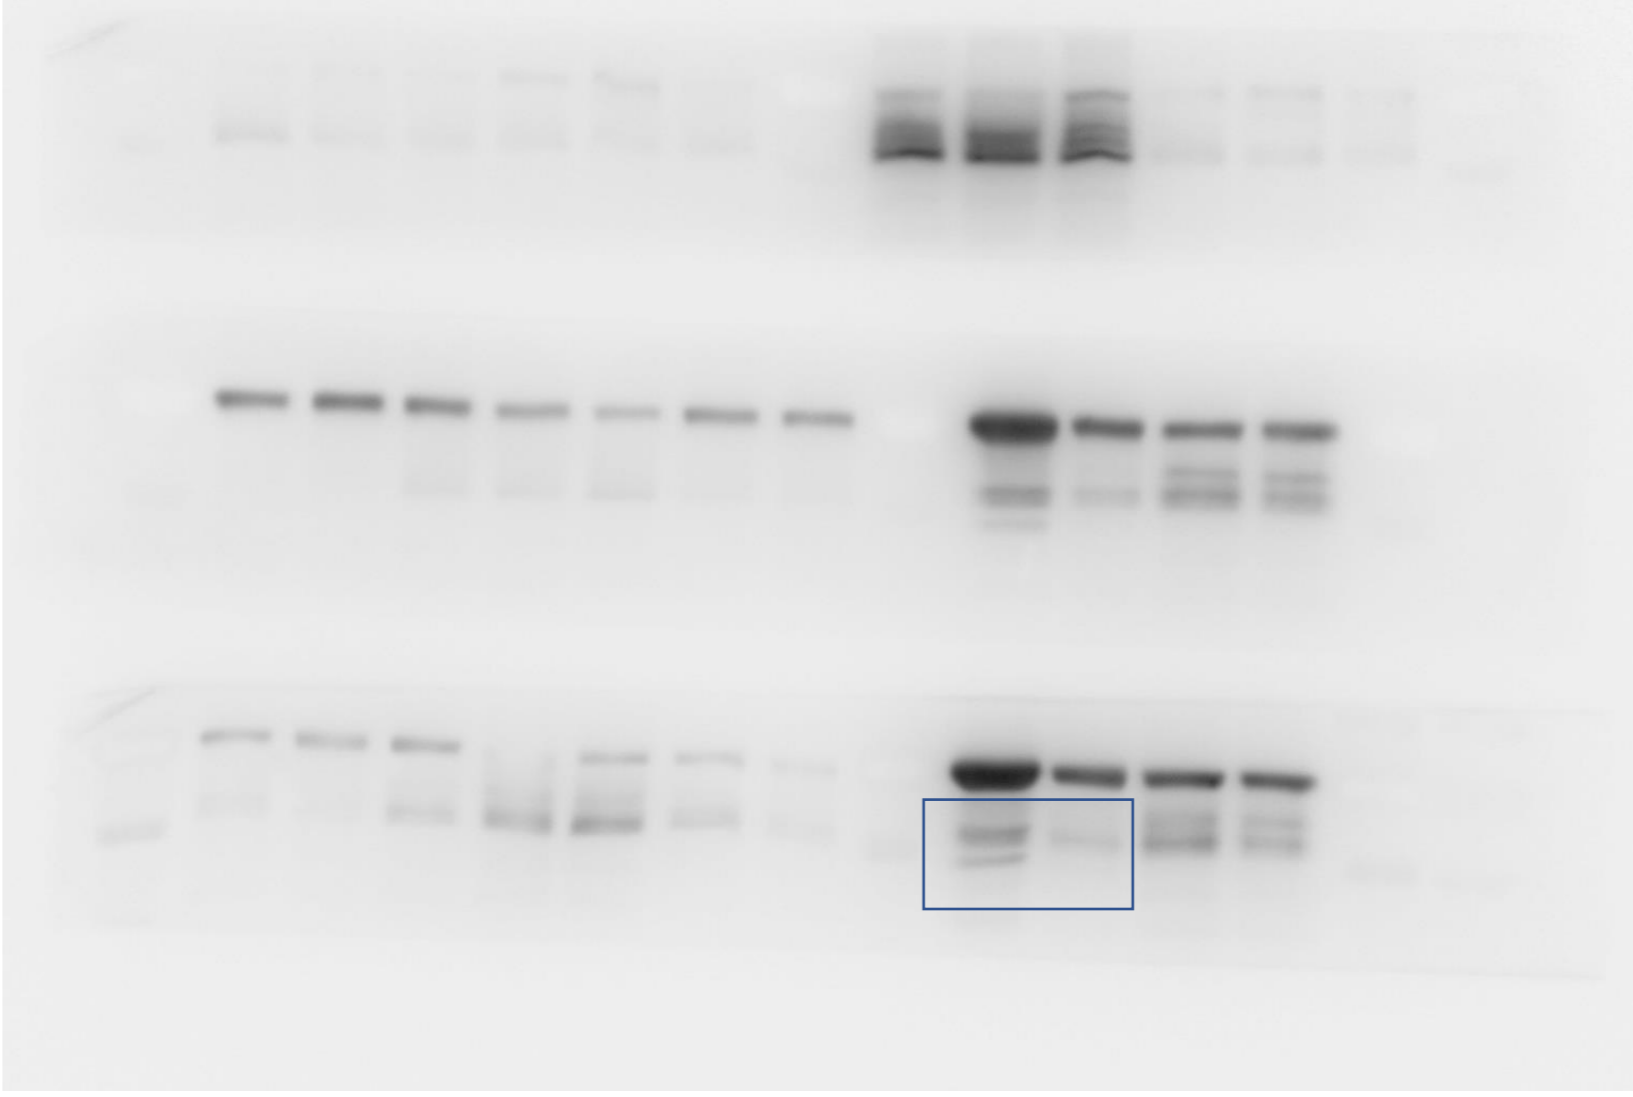

GAPDH

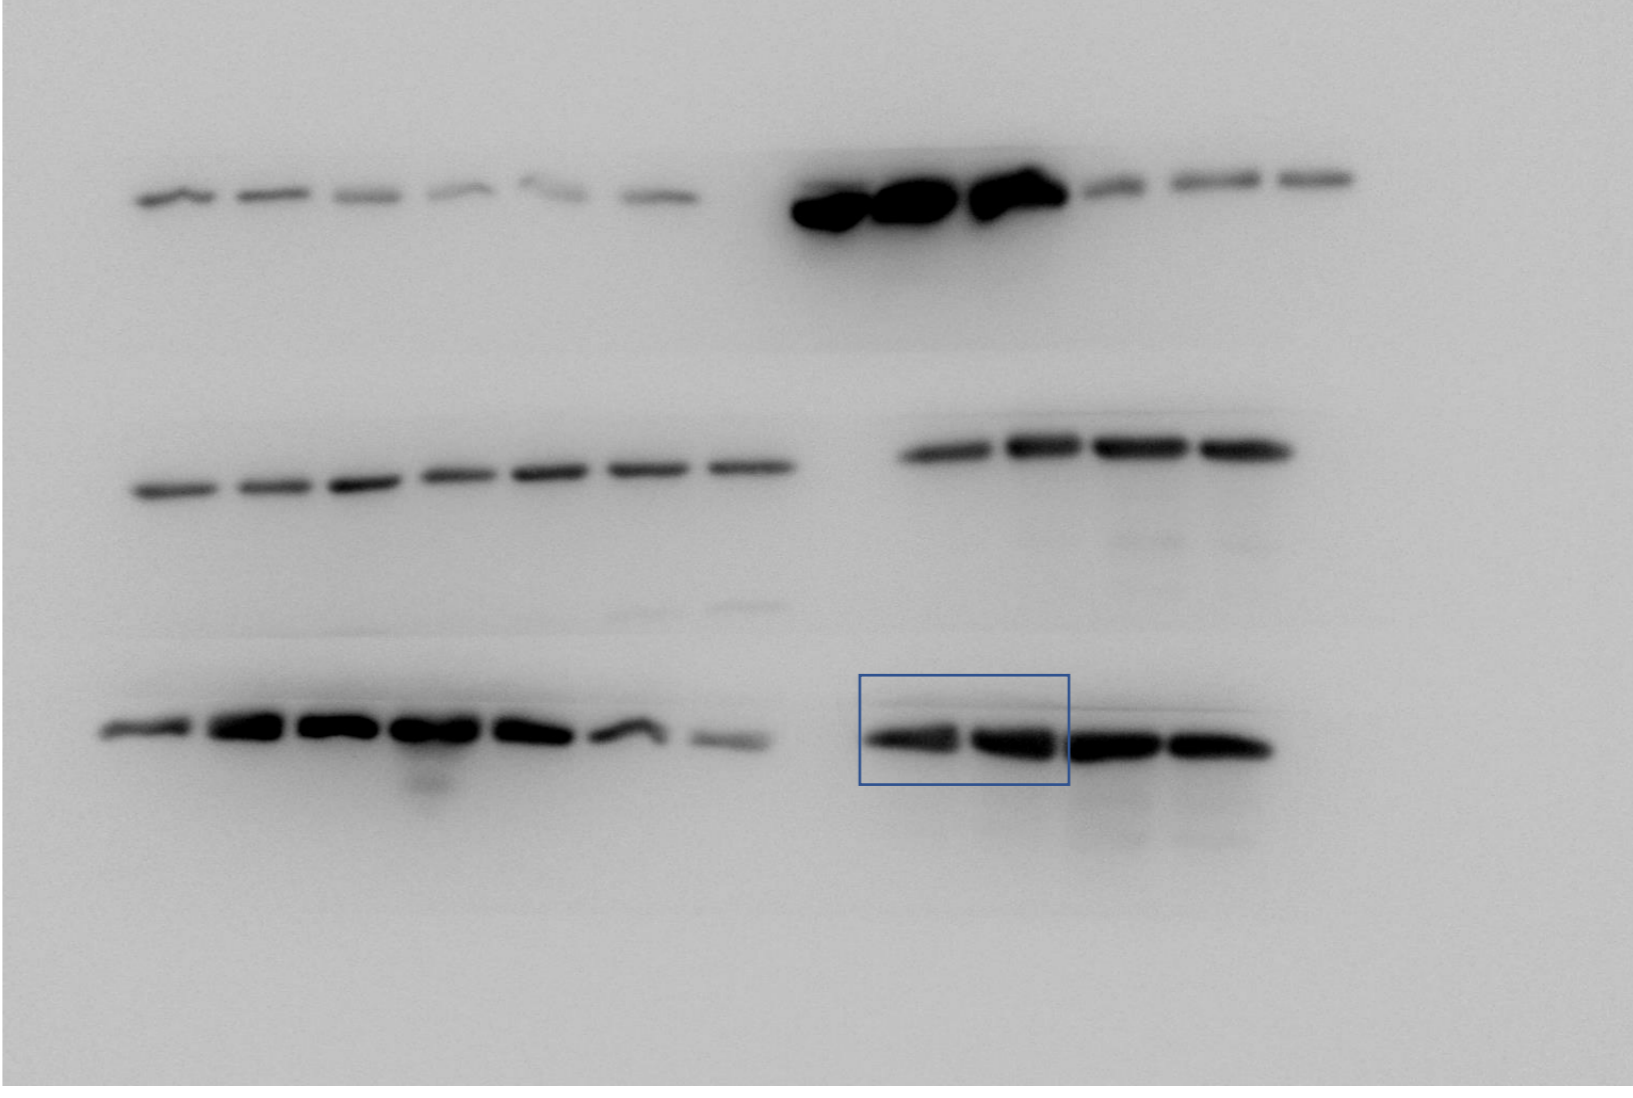



Figure S3

**e**

|       |                                                                                   |                                                                                   |          |  |
|-------|-----------------------------------------------------------------------------------|-----------------------------------------------------------------------------------|----------|--|
|       |                                                                                   | Vector-MSC                                                                        | iOPN-MSC |  |
| iOPN  | 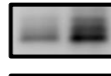 |  | — 55 kDa |  |
| GAPDH |  |  | — 37 kDa |  |

iOPN

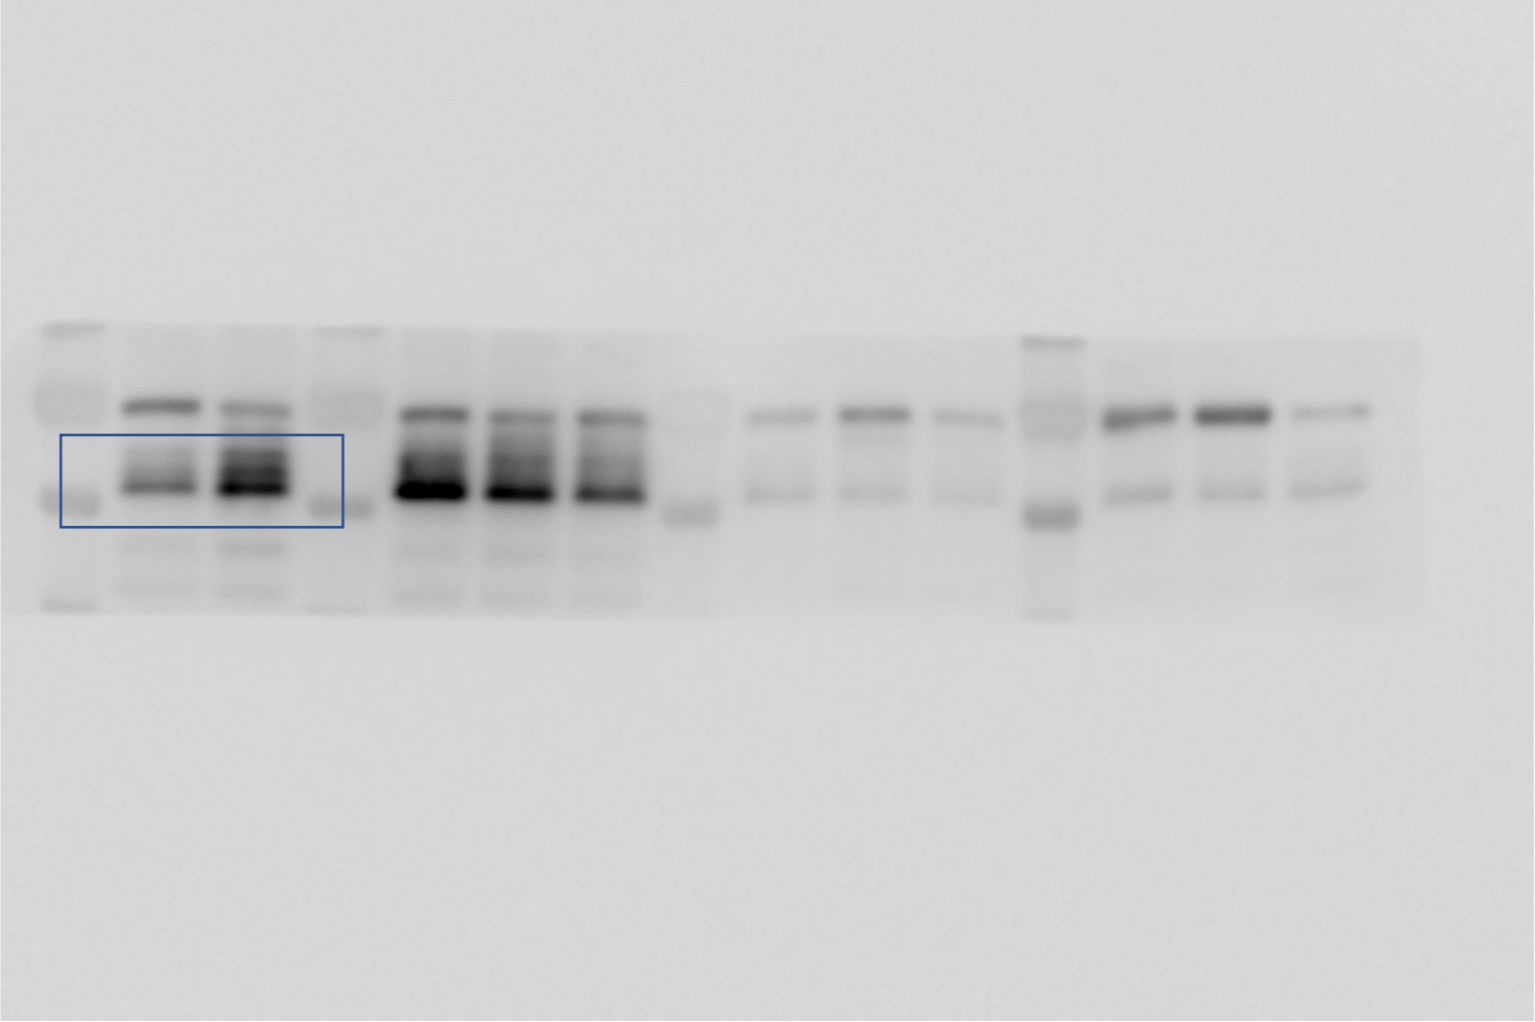

GAPDH

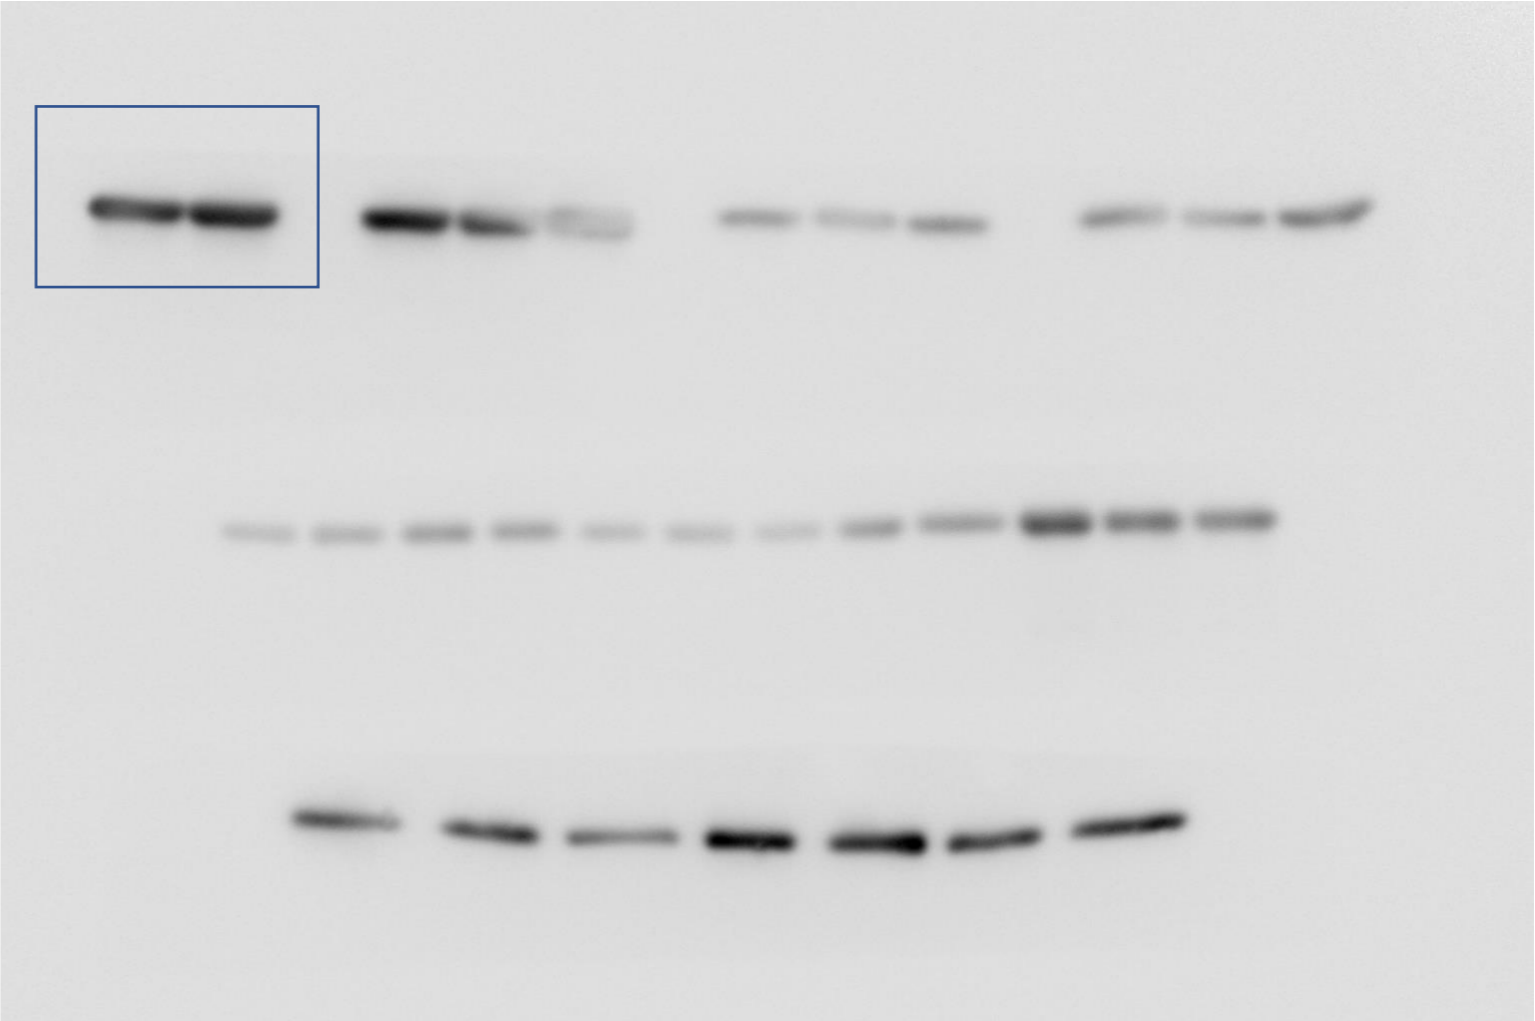

Supplement: 13287_2024_3979_MOESM1_ESM.pdf [file 13287_2024_3979_MOESM1_ESM.pdf]
