# Supplementary material for: Intracellular osteopontin potentiates the immunosuppressive activity of mesenchymal stromal cells
Source: PubMed Central journal article supplement — Stem Cell Res Ther. 2024 Oct 15;15:366. doi: 10.1186/s13287-024-03979-8 (PMC11475537; doi:10.1186/s13287-024-03979-8), 2024-10-15

## Supplementary Figure Legends

### **Fig. S1. Gene enrichment analysis between MSCs with inflammatory stimulated and unstimulated.**

RNA of MSCs with inflammatory stimulated and unstimulated was collected for RNA-sequencing analysis. Volcano plot of changed genes when MSCs stimulated by TNF- $\alpha$  (10 ng/mL) plus IFN- $\gamma$  (10 ng/mL) for 24 h compared with unstimulated MSCs was shown.

### **Fig. S2. Identification of the phenotypes of WT-MSCs and OPN<sup>-/-</sup>-MSCs.**

(a) OPN expression was determined in WT-MSCs and OPN<sup>-/-</sup>-MSCs by quantitative real-time PCR and immunoblotting analysis. Full-length blots are presented in Additional file 1: Fig. S2a.

(b) Markers of WT-MSCs and OPN<sup>-/-</sup>-MSCs were analyzed by flow cytometry. (c) WT-

MSCs and OPN<sup>-/-</sup>-MSCs were cultured in osteogenic differentiation medium, adipogenic differentiation medium and chondroblast differentiation medium, and staining was performed to indicate the effects of OPN on MSC differentiation. The expression of sox9, col2 and aggrecan, markers of chondroblast differentiation of MSCs, was also determined by quantitative real-time PCR. The results are representative of three to six independent experiments. Values are shown as the mean  $\pm$  SEM and statistical significance is indicated as \*P < 0.05, \*\*P < 0.01 and \*\*\*P < 0.001.

### **Fig. S3. iOPN promoted proliferation and inhibited IFN- $\gamma$ plus TNF- $\alpha$ -induced apoptosis in MSCs.**

(a-g) MSCs were stimulated with or without TNF- $\alpha$  (10 ng/mL) plus IFN- $\gamma$  (10 ng/mL) for 24 h. Recombinational sOPN or neutralizing antibody of sOPN was added into the medium of MSCs for 24 h before inflammation stimulation. (e) iOPN overexpression in MSCs was determined by immunoblotting analysis and quantitative real-

time PCR. Full-length blots are presented in Additional file 1: Fig. S3e. **(a, c, f)** The proliferation of MSCs was analyzed by a CCK8 kit. **(b, d, g)** The percentage of apoptotic MSCs after the indicated treatments was analyzed by flow cytometry. The results are representative of three to six independent experiments. Values are shown as the mean  $\pm$  SEM and statistical significance is indicated as \* $P < 0.05$ , \*\* $P < 0.01$  and \*\*\* $P < 0.001$ . ns = no significance.

**Fig. S4. iOPN overexpression in MSCs suppressed immune responses more effectively *in vivo*.** **(a-c)** Mice were intravenously injected with ConA (20 mg/kg), and untreated, Vector-MSCs and iOPN-MSCs were transfused immediately (n = 5 per group). Eight hours later, livers and spleens were sampled. **(a)** Percentages of CD4<sup>+</sup> T cells in livers and spleens were determined by flow cytometry. The absolute numbers and percentages of CD4<sup>+</sup> T cells in livers and spleens were counted. **(b)** BrdU was intraperitoneally injected into naïve mice, ConA mice, Vector-MSC-treated mice or iOPN-MSC-treated mice. Eight hours later, MNCs were isolated from livers and spleens. The percentages of CD4<sup>+</sup>BrdU<sup>+</sup> T cells in the livers and spleens were determined by flow cytometry. **(c)** The levels of CD25 and CD69 on CD4<sup>+</sup> T cells in livers and spleens were analyzed by flow cytometry. **(d-e)** Mice were fed DSS, untreated, Vector-MSCs and iOPN-MSCs were transfused every two days (n = 5 per group). **(d)** Percentages of CD4<sup>+</sup> T cells in the colon and MLNs were determined by flow cytometry. The absolute numbers and percentages of CD4<sup>+</sup> T cells in the colon and MLNs were counted. **(e)** Percentages and absolute numbers of LY6G<sup>+</sup> cells and F4/80<sup>+</sup> cells in colons were determined by flow cytometry. The results are representative of three

to six independent experiments. Values are shown as the mean  $\pm$  SEM and statistical significance is indicated as \*P < 0.05, \*\*P < 0.01 and \*\*\*P < 0.001.

**Fig. S5. Analysis of gene correlation between OPN and iNOS in MSCs.** RNA of MSCs with inflammatory stimulated (TNF- $\alpha$  (10 ng/mL) plus IFN- $\gamma$  (10 ng/mL) for 24 h) and unstimulated was collected for RNA-sequencing analysis. Heatmap of the correlation between gene expression (rows and columns) was shown.

**Fig. S6. OPN was not regulated by T-bet or hnRNP-A/B in MSCs under inflammation.**

**(a)** MSCs were treated with TNF- $\alpha$  (10 ng/mL) plus IFN- $\gamma$  (10 ng/mL) for 24 h. The mRNA was isolated from the cells and *opn*, T-bet, hnRNP-A/B levels were measured by quantitative real-time PCR. **(b-c)** siRNA targeting T-bet or hnRNP-A/B was transfected into MSCs. Then, MSCs were treated with TNF- $\alpha$  (10 ng/mL) plus IFN- $\gamma$  (10 ng/mL) for 24 h. Total mRNA was collected, and the levels of *opn*, T-bet and hnRNP-A/B expression were measured by quantitative real-time PCR. The results are representative of three to six independent experiments. Values are shown as the mean  $\pm$  SEM and statistical significance is indicated as \*P < 0.05, \*\*P < 0.01 and \*\*\*P < 0.001. ns = no significance.

Figure S1

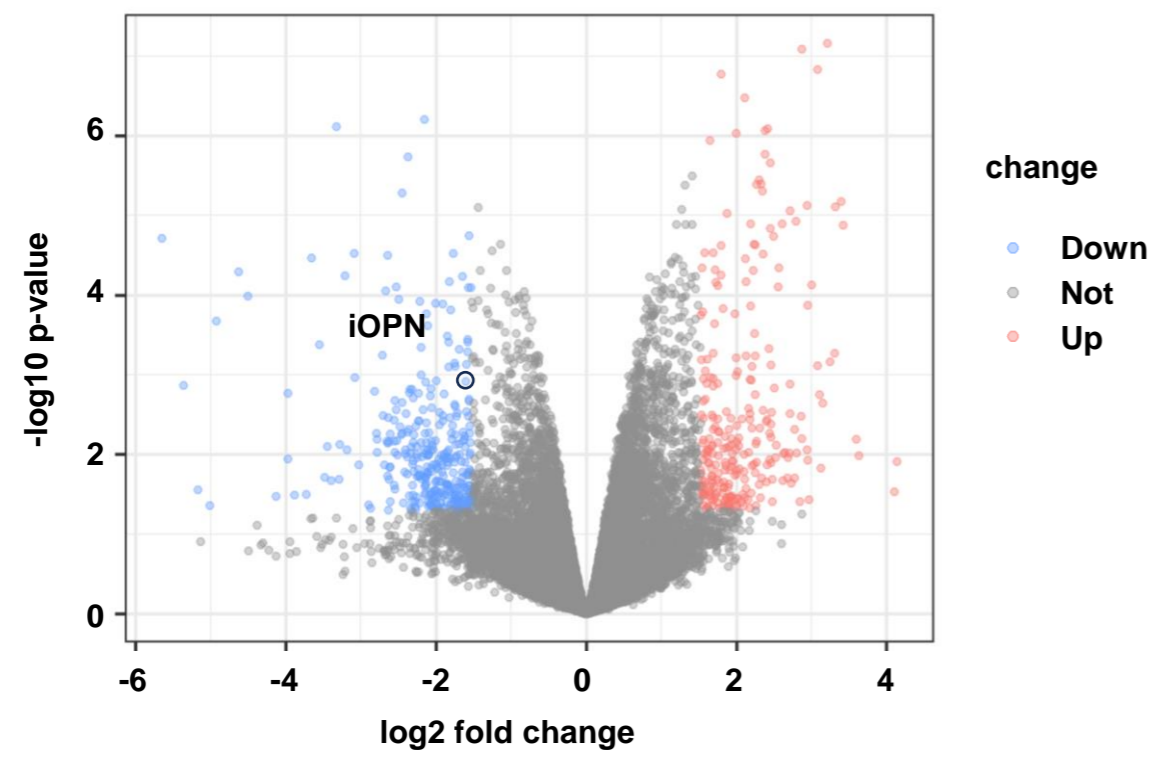

Figure S2

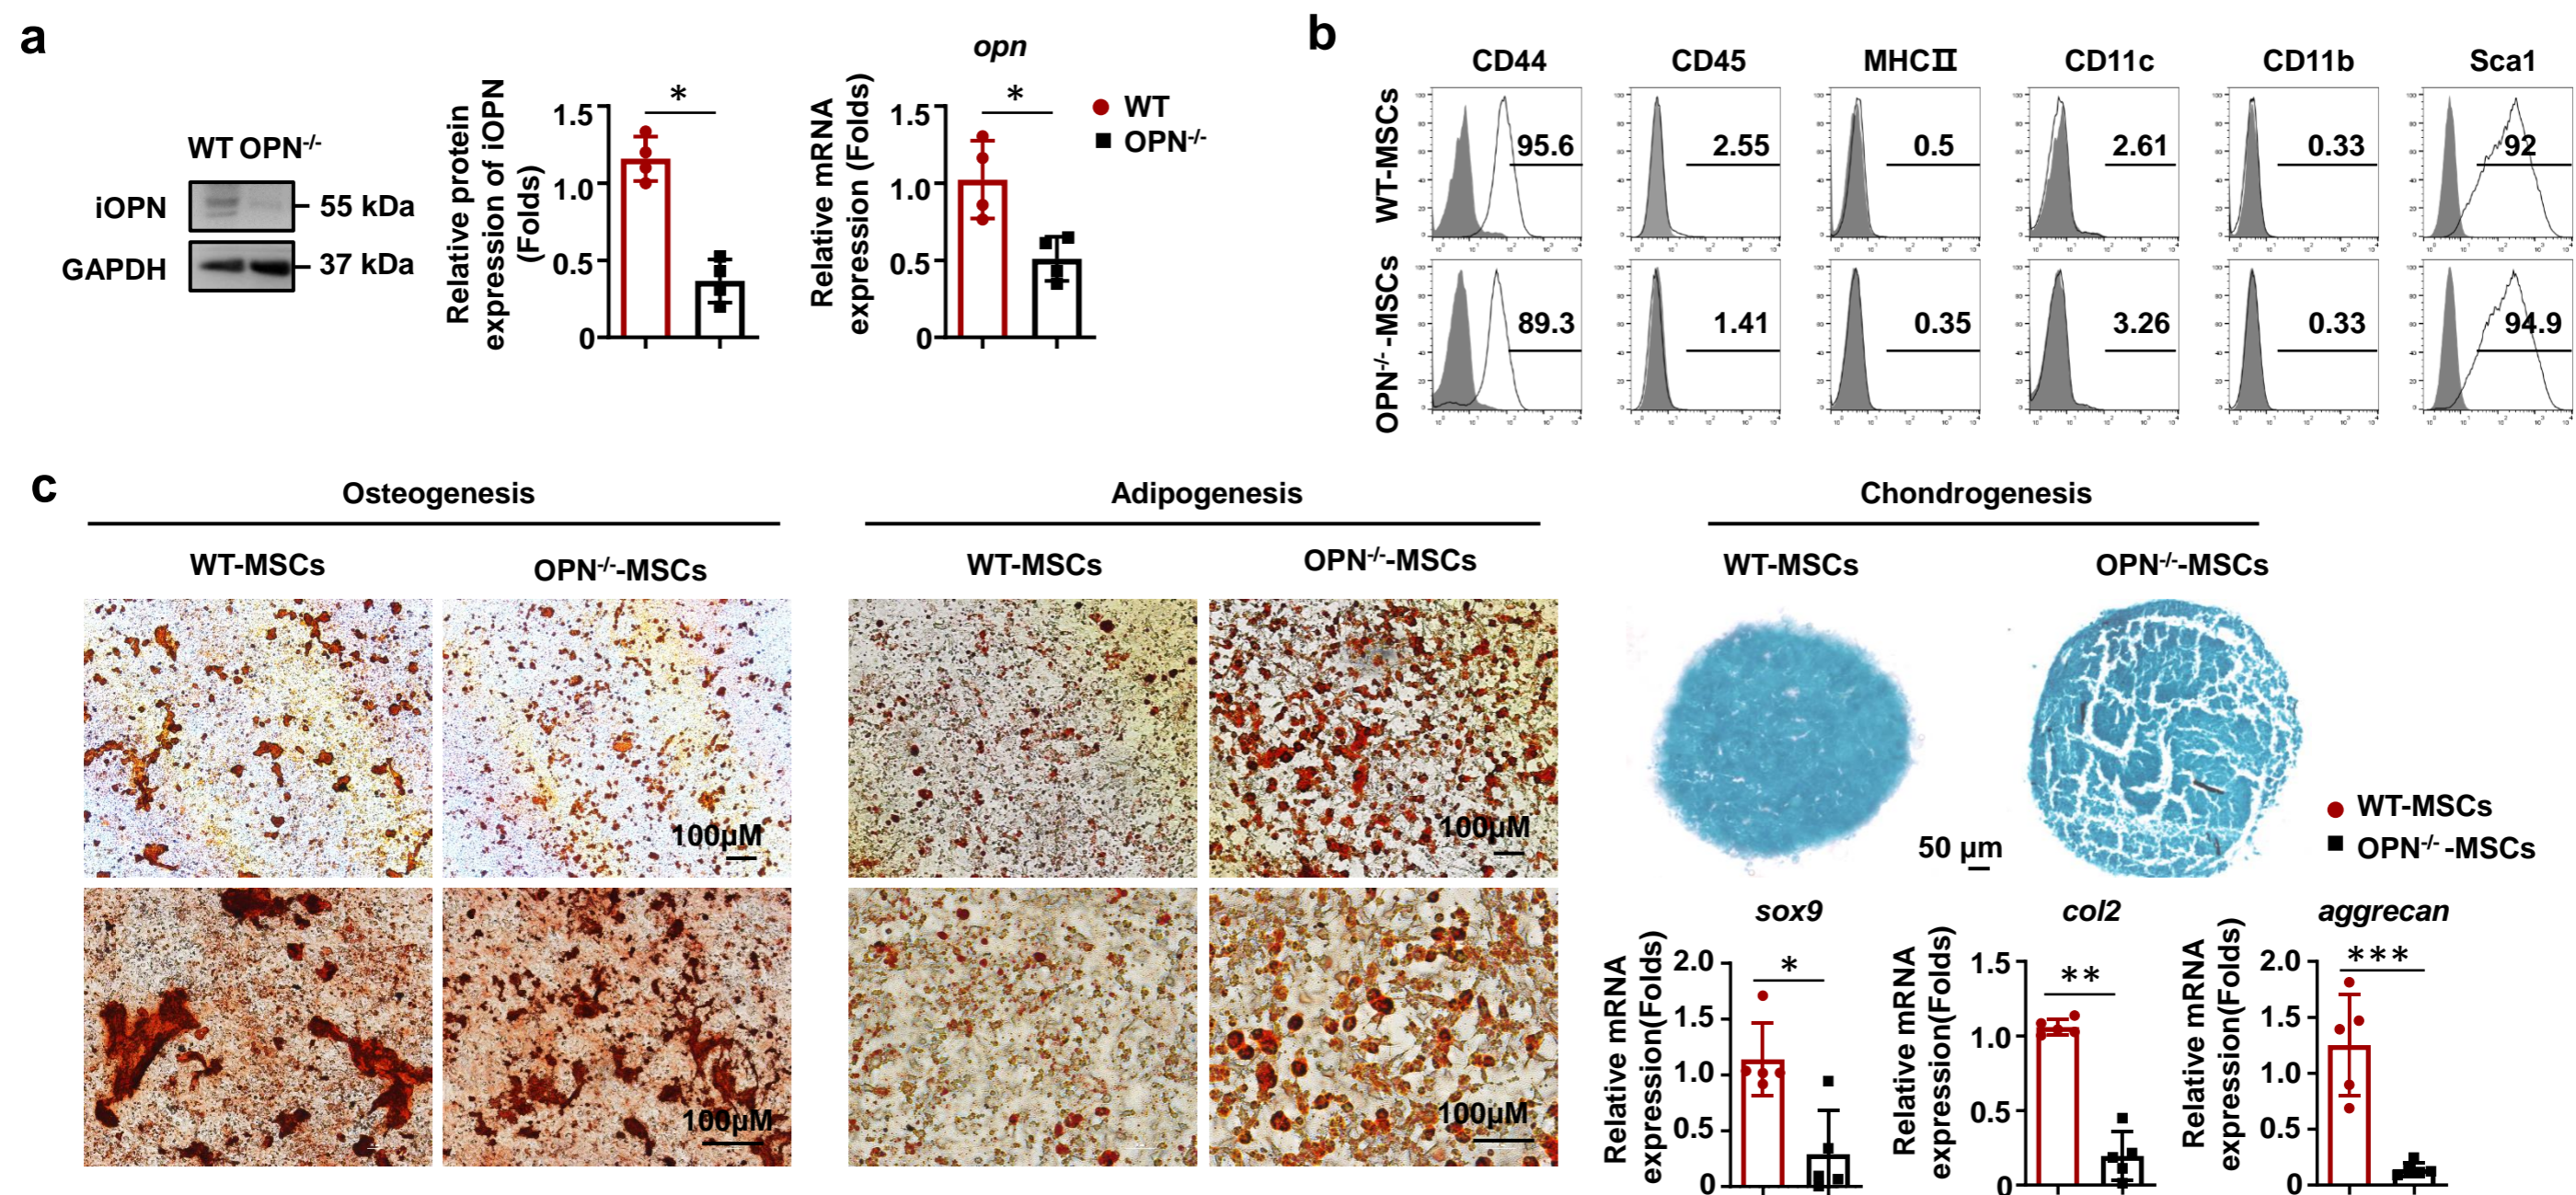



Figure S3

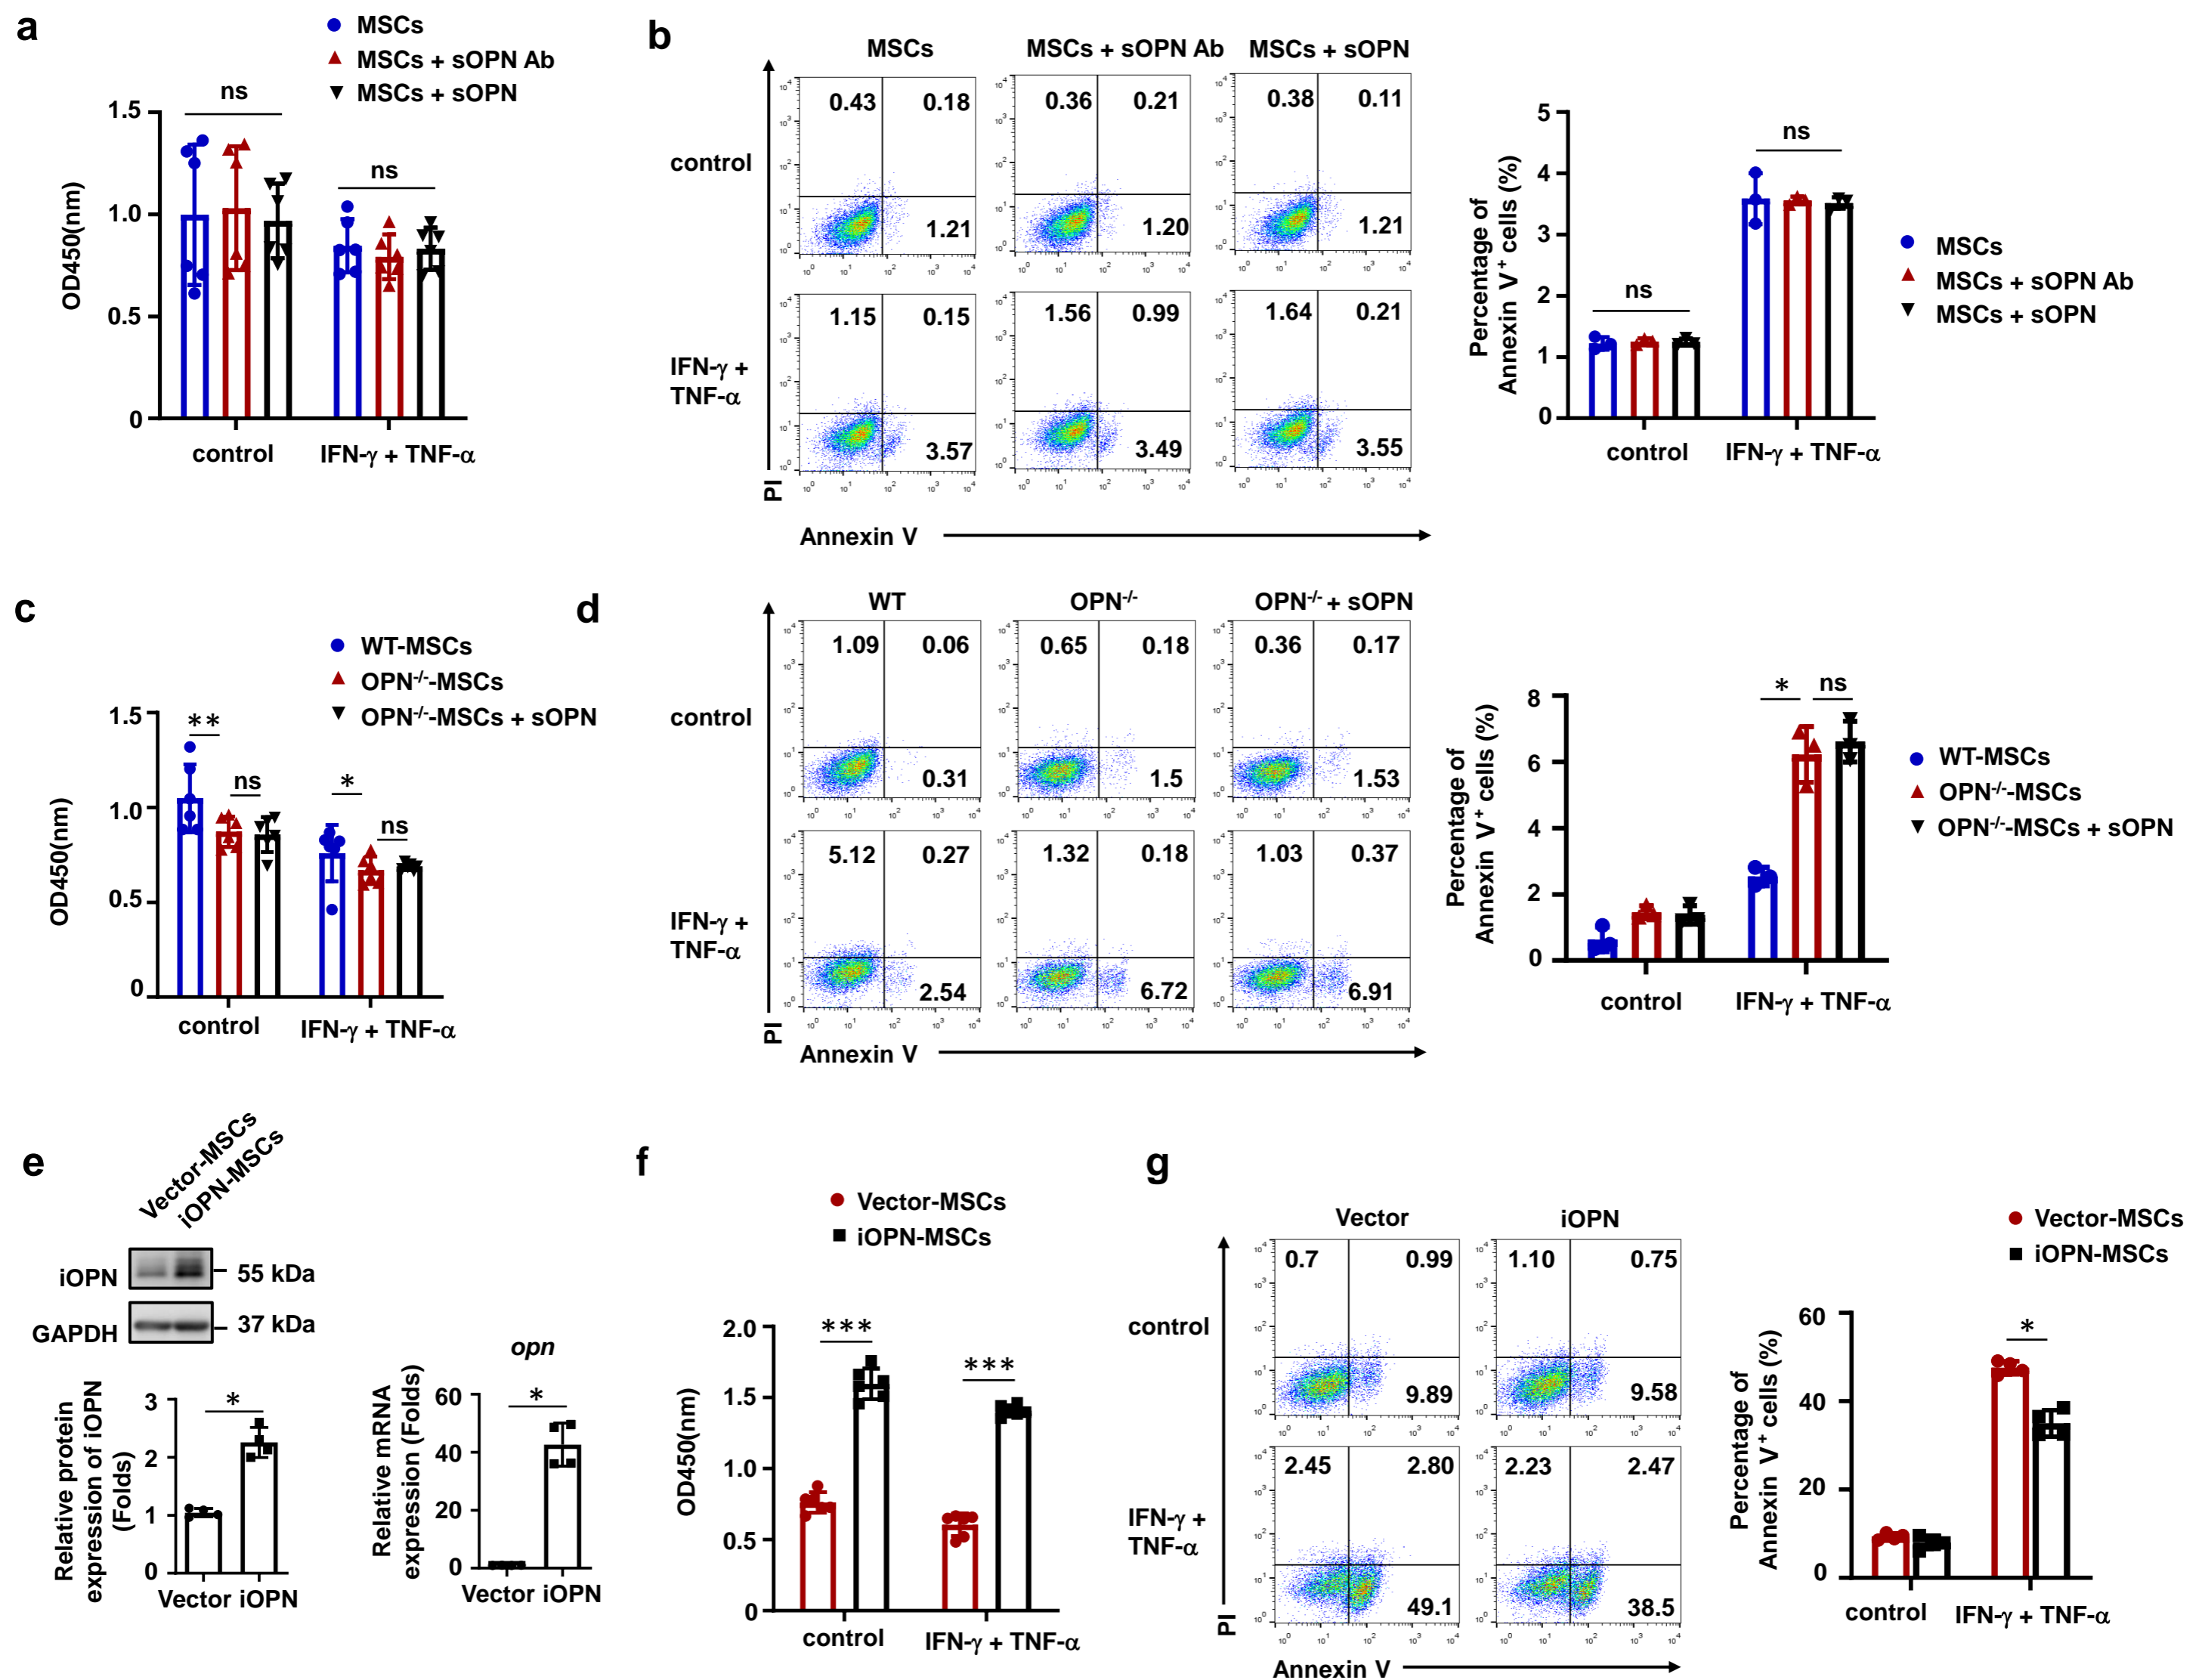

Figure S4

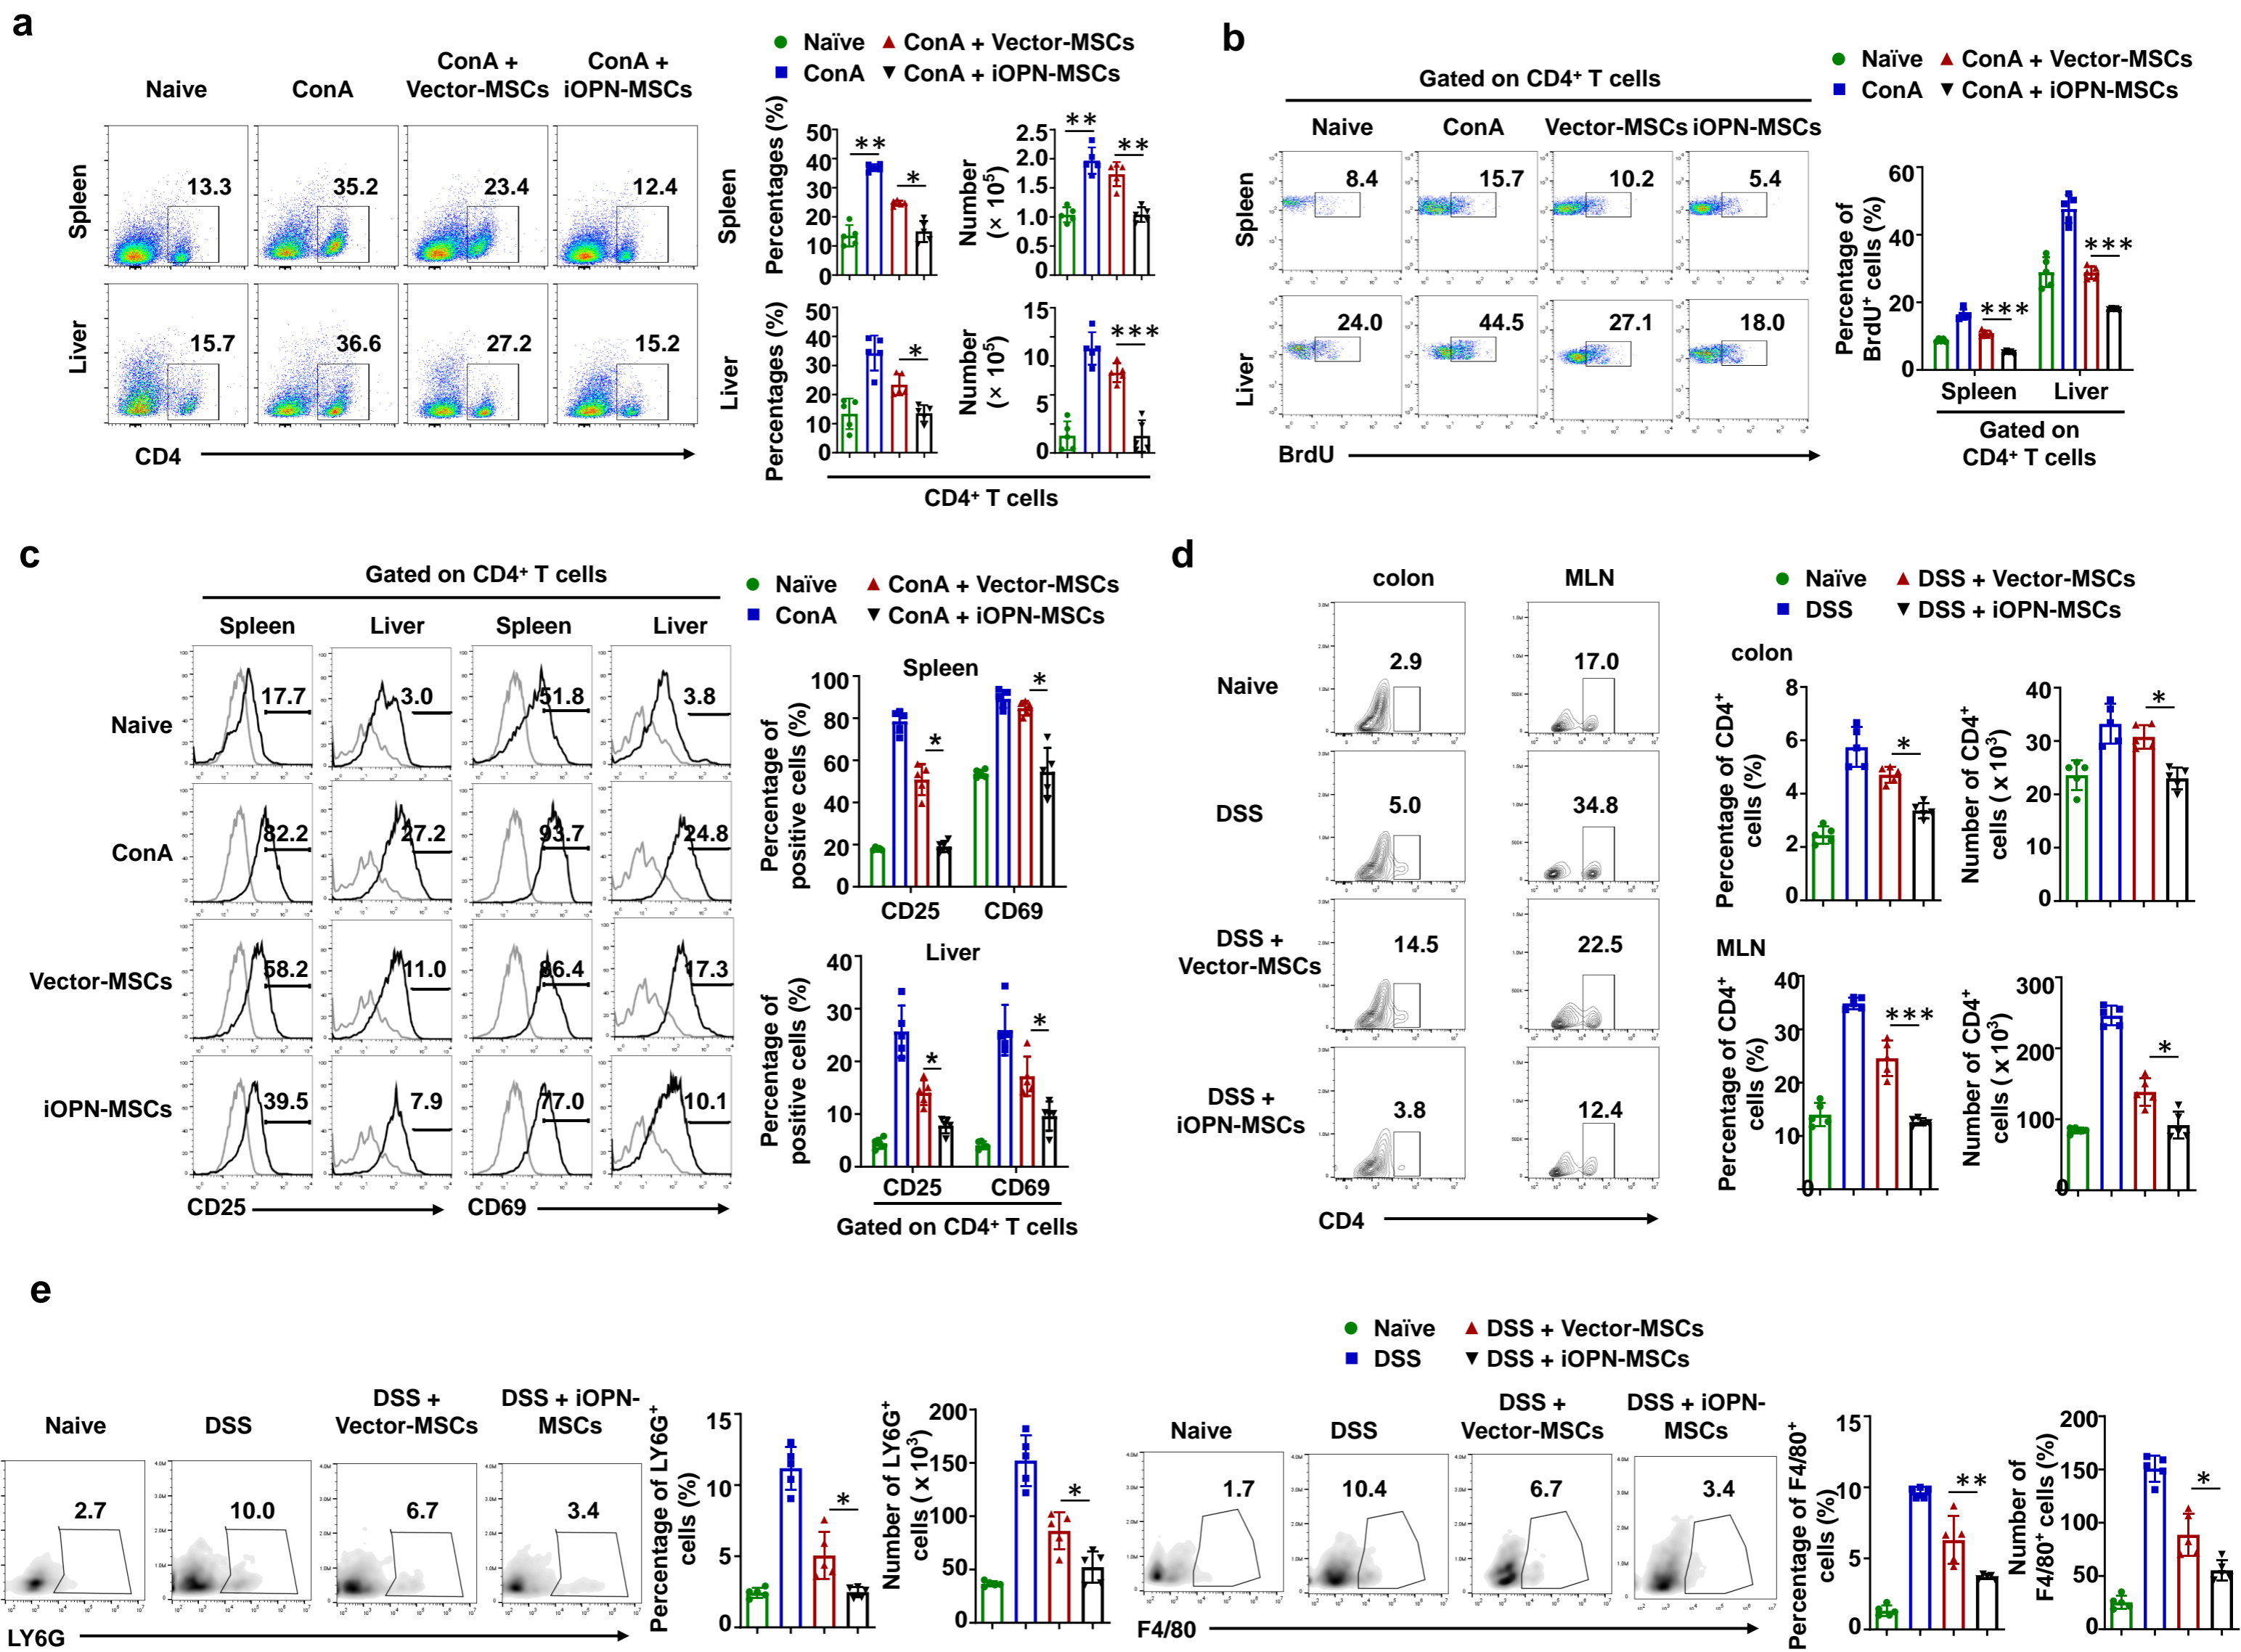

Figure S5

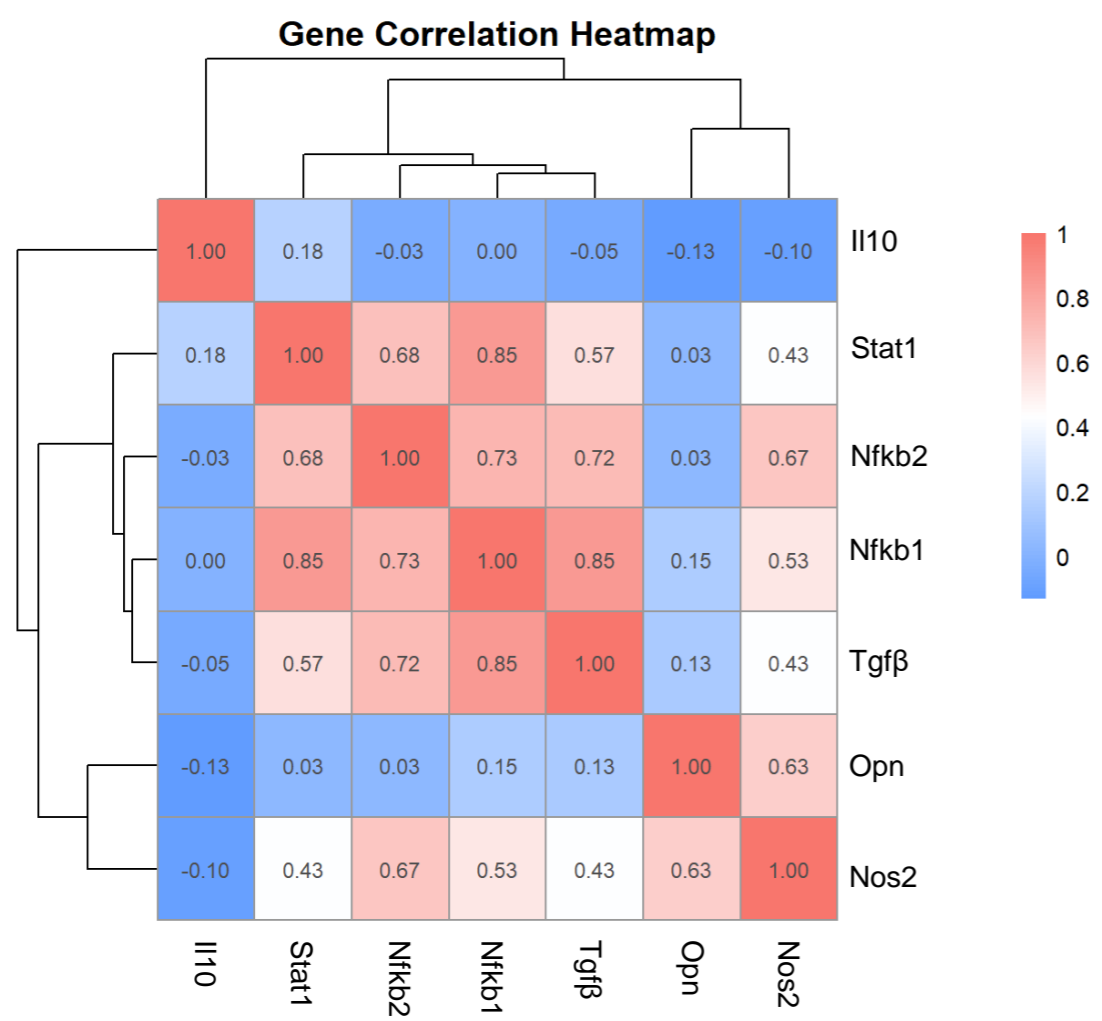



Figure S6

**a**

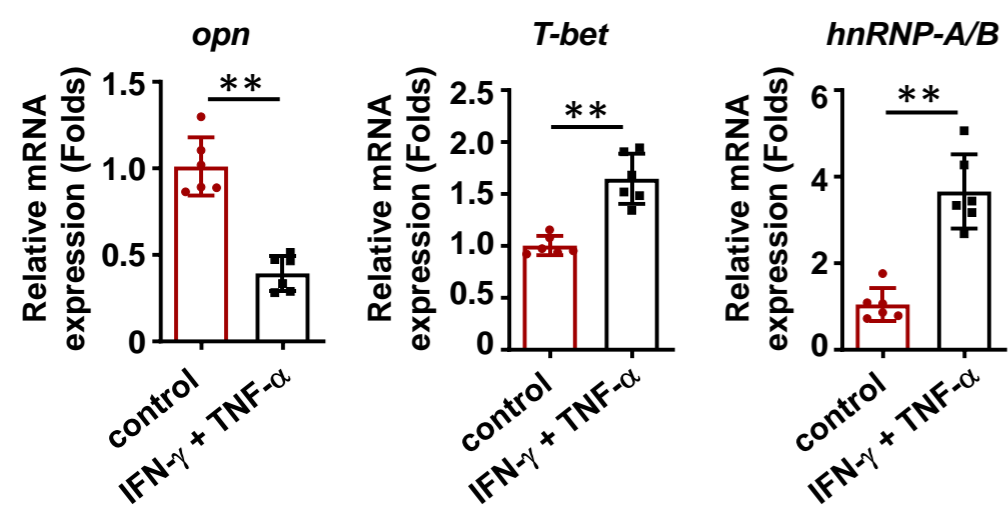

**b**

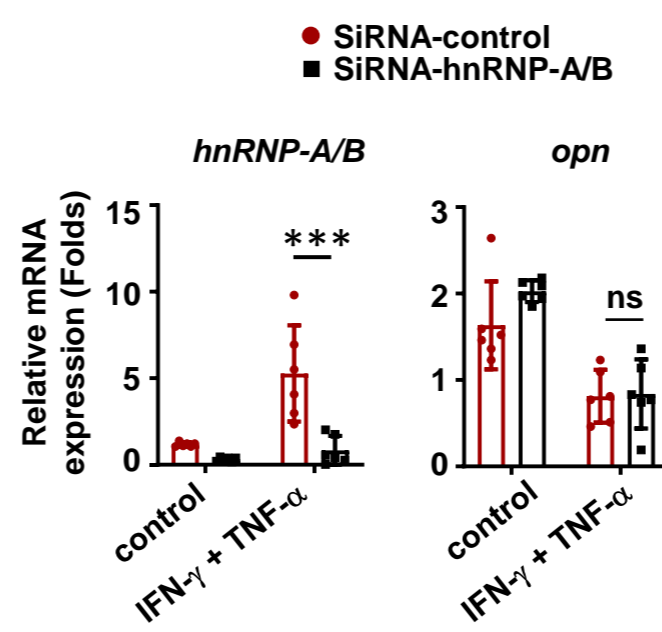

**c**

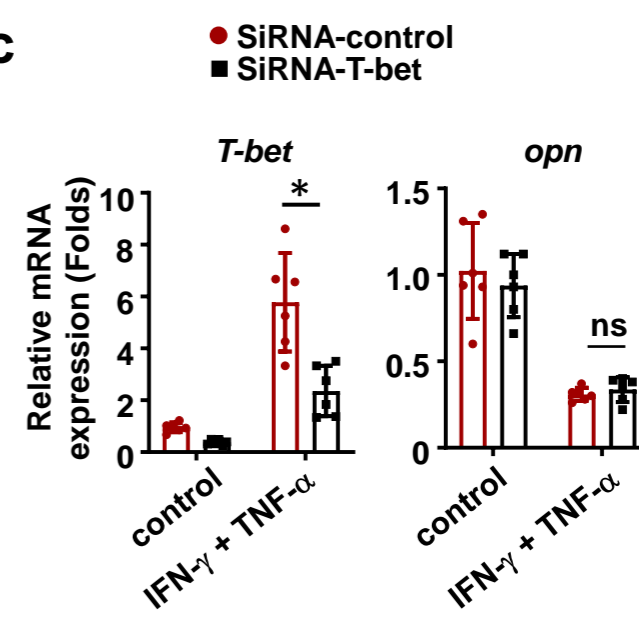

Supplement: 13287_2024_3979_MOESM3_ESM.pdf [file 13287_2024_3979_MOESM3_ESM.pdf]
